# Supplementary material for: Dose-dependent regulation of target gene expression and cell proliferation by c-Myc levels
Source: PubMed Central journal article supplement — Transcription. 2013 Aug 2;4(4):192–7. doi: 10.4161/trns.25907 (PMC3977919; doi:10.4161/trns.25907), 2013-08-02
Supplement: tran-4-192-s01.pdf [file tran-4-192-s01.pdf]

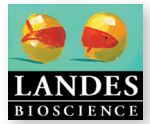

## **Supplemental Material to:**

**Marino Schuhmacher and Dirk Eick**

**Dose-dependent regulation of target gene expression and  
cell proliferation by c-Myc levels**

**Transcription 2013; 4(4)**

**<http://dx.doi.org/10.4161/trns.25907>**

**[www.landesbioscience.com/journals/transcription/article/25907/](http://www.landesbioscience.com/journals/transcription/article/25907/)**

HGNC Symbol  
Ensembl ID  
Gene Description  
regulation\_48h  
Ontology  
Group

|                          |                                                                                        |
|--------------------------|----------------------------------------------------------------------------------------|
| ratioDiff_8Tc vs 100Tc   | Ratio of induction (signal at 8 ng/mL TC / signal at 100 ng/mL TC)                     |
| ratioDiff_6Tc vs 100Tc   | Ratio of induction (signal at 6 ng/mL TC / signal at 100 ng/mL TC)                     |
| ratioDiff_5Tc vs 100Tc   | Ratio of induction (signal at 5 ng/mL TC / signal at 100 ng/mL TC)                     |
| ratioDiff_4Tc vs 100Tc   | Ratio of induction (signal at 4 ng/mL TC / signal at 100 ng/mL TC)                     |
| ratioDiff_3Tc vs 100Tc   | Ratio of induction (signal at 3 ng/mL TC / signal at 100 ng/mL TC)                     |
| ratioDiff_2Tc vs 100Tc   | Ratio of induction (signal at 2 ng/mL TC / signal at 100 ng/mL TC)                     |
| ratioDiff_1 5Tc vs 100Tc | Ratio of induction (signal at 1.5 ng/mL TC / signal at 100 ng/mL TC)                   |
| ratioDiff_1Tc vs 100Tc   | Ratio of induction (signal at 1 ng/mL TC / signal at 100 ng/mL TC)                     |
| ratioDiff_0 5Tc vs 100Tc | Ratio of induction (signal at 0.5 ng/mL TC / signal at 100 ng/mL TC)                   |
| ratioDiff_0Tc vs 100Tc   | Ratio of induction (signal at 0 ng/mL TC / signal at 100 ng/mL TC)                     |
| Ex_100Tc                 | Expression signal on filter (PhosphorImager data)                                      |
| Ex_8Tc                   | Expression signal on filter (PhosphorImager data)                                      |
| Ex_6Tc                   | Expression signal on filter (PhosphorImager data)                                      |
| Ex_5Tc                   | Expression signal on filter (PhosphorImager data)                                      |
| Ex_4Tc                   | Expression signal on filter (PhosphorImager data)                                      |
| Ex_3Tc                   | Expression signal on filter (PhosphorImager data)                                      |
| Ex_2Tc                   | Expression signal on filter (PhosphorImager data)                                      |
| Ex_1 5Tc                 | Expression signal on filter (PhosphorImager data)                                      |
| Ex_1Tc                   | Expression signal on filter (PhosphorImager data)                                      |
| Ex_0 5Tc                 | Expression signal on filter (PhosphorImager data)                                      |
| Ex_0Tc                   | Expression signal on filter (PhosphorImager data)                                      |
| signDiff_8Tc vs 100Tc    | Significance of the difference between signal at 8 ng/mL TC / signal at 100 ng/mL TC   |
| signDiff_6Tc vs 100Tc    | Significance of the difference between signal at 6 ng/mL TC / signal at 100 ng/mL TC   |
| signDiff_5Tc vs 100Tc    | Significance of the difference between signal at 5 ng/mL TC / signal at 100 ng/mL TC   |
| signDiff_4Tc vs 100Tc    | Significance of the difference between signal at 4 ng/mL TC / signal at 100 ng/mL TC   |
| signDiff_3Tc vs 100Tc    | Significance of the difference between signal at 3 ng/mL TC / signal at 100 ng/mL TC   |
| signDiff_2Tc vs 100Tc    | Significance of the difference between signal at 2 ng/mL TC / signal at 100 ng/mL TC   |
| signDiff_1 5Tc vs 100Tc  | Significance of the difference between signal at 1.5 ng/mL TC / signal at 100 ng/mL TC |
| signDiff_1Tc vs 100Tc    | Significance of the difference between signal at 1 ng/mL TC / signal at 100 ng/mL TC   |
| signDiff_0 5Tc vs 100Tc  | Significance of the difference between signal at 0.5 ng/mL TC / signal at 100 ng/mL TC |
| signDiff_0Tc vs 100Tc    | Significance of the difference between signal at 0 ng/mL TC / signal at 100 ng/mL TC   |
| signEx_100Tc             | Significant signal on filter (significant over background)                             |
| signEx_8Tc               | Significant signal on filter (significant over background)                             |
| signEx_6Tc               | Significant signal on filter (significant over background)                             |
| signEx_5Tc               | Significant signal on filter (significant over background)                             |
| signEx_4Tc               | Significant signal on filter (significant over background)                             |
| signEx_3Tc               | Significant signal on filter (significant over background)                             |
| signEx_2Tc               | Significant signal on filter (significant over background)                             |
| signEx_1 5Tc             | Significant signal on filter (significant over background)                             |
| signEx_1Tc               | Significant signal on filter (significant over background)                             |
| signEx_0 5Tc             | Significant signal on filter (significant over background)                             |
| signEx_0Tc               | Significant signal on filter (significant over background)                             |

| HGNC Symbol | Ensembl ID      | Gene Description                                                                                                                                                                                   |
|-------------|-----------------|----------------------------------------------------------------------------------------------------------------------------------------------------------------------------------------------------|
| MYC         | ENSG00000136997 | MYC PROTO-ONCOGENE PROTEIN (C-MYC). [Source:SWISSPROT;Acc:P04467]myc proto-oncogene protein (C-MYC) (P04467)                                                                                       |
| CACNA1G     | ENSG00000006283 | T-type calcium channel alpha1G (CACNA1G); low-voltage-activated T-type calcium channel alpha1G (CACNA1G); low-voltage-activated                                                                    |
| NME1        | ENSG00000011052 | NUCLEOSIDE DIPHOSPHATE KINASE A (EC 2.7.4.6) (NDK A) (NUCLEOSIDE DIPHOSPHATE KINASE A, TYPE II) (EC 4.6.1.1) (ATP PYROPHOSPHATASE, TYPE II) (ATP PYROPHOSPHATASE, TYPE II)                         |
| ADCY2       | ENSG00000078295 | ADENYLATE CYCLASE, TYPE II (EC 4.6.1.1) (ATP PYROPHOSPHATASE, TYPE II) (ATP PYROPHOSPHATASE, TYPE II)                                                                                              |
| C4orf9      | ENSG00000087269 | chromosome 4 open reading frame 9Cluster Incl. AF040965: Homo sapiens chromosome 4 open reading frame 9 (C4orf9)                                                                                   |
| FKBP5       | ENSG00000096060 | FK506-BINDING PROTEIN 5 (EC 5.2.1.8) (PEPTIDYL-PROLYL ISOMERASE, CYTOPLASMIC) (PEPTIDYL-PROLYL ISOMERASE, CYTOPLASMIC)                                                                             |
| CRKL        | ENSG00000099942 | CRK-LIKE PROTEINv-crk sarcoma virus CT10 oncogene homolog (CRKL)                                                                                                                                   |
| RFC5        | ENSG00000111445 | ACTIVATOR 1 36 KDA SUBUNIT (REPLICATION FACTOR C 36 KDA SUBUNIT)                                                                                                                                   |
| PPP2CA      | ENSG00000113575 | SERINE/THREONINE PROTEIN PHOSPHATASE 2A, CATALYTIC SUBUNIT (PPP2CA)                                                                                                                                |
| TIMM8A      | ENSG00000126953 | MITOCHONDRIAL IMPORT INNER MEMBRANE TRANSLOCASE (TIMM8A)                                                                                                                                           |
| n.a.        | ENSG00000132199 | RTS BETA PROTEIN. [Source:RefSeq;Acc:NM_017512]rTS beta protein (RTS)                                                                                                                              |
| MAD2L1      | ENSG00000164109 | MITOTIC SPINDLE ASSEMBLY CHECKPOINT PROTEIN MAD2A (MAD2L1)                                                                                                                                         |
| MRPL12      | ---             | Mrp17mitochondrial ribosomal protein L12 /// mitochondrial ribosomal protein L12                                                                                                                   |
| NME1        | ENSG00000011052 | NUCLEOSIDE DIPHOSPHATE KINASE A (EC 2.7.4.6) (NDK A) (NUCLEOSIDE DIPHOSPHATE KINASE A, TYPE II) (EC 4.6.1.1) (ATP PYROPHOSPHATASE, TYPE II) (ATP PYROPHOSPHATASE, TYPE II)                         |
| METTL1      | ENSG00000037897 | METHYLTRANSFERASE-LIKE PROTEIN 1, ISOFORM C; D1075-LARGE NEUTRAL AMINO ACIDS TRANSPORTER SMALL SUBUNIT (METTL1)                                                                                    |
| SLC7A5      | ENSG00000103257 | LARGE NEUTRAL AMINO ACIDS TRANSPORTER SMALL SUBUNIT (SLC7A5)                                                                                                                                       |
| SRM         | ENSG00000116649 | SPERMIDINE SYNTHASE (EC 2.5.1.16) (PUTRESCINE AMINOPIPERAZINE SYNTHASE) (SPERMIDINE SYNTHASE)                                                                                                      |
| IL1B        | ENSG00000125538 | INTERLEUKIN-1 BETA PRECURSOR (IL-1 BETA) (CATABOLIN) (INTERLEUKIN-1 BETA PRECURSOR)                                                                                                                |
| PAICS       | ENSG00000128050 | MULTIFUNCTIONAL PROTEIN ADE2 [INCLUDES: PHOSPHORIBOSYLTRANSFERASE 2 (EC 2.4.1.19) (ADENOSYLTRANSFERASE 2) (ADENOSYLTRANSFERASE 2)]                                                                 |
| TOMM40      | ENSG00000130204 | PROBABLE MITOCHONDRIAL IMPORT RECEPTOR SUBUNIT (TOMM40)                                                                                                                                            |
| PYCR1       | ENSG00000141548 | PYRROLINE-5-CARBOXYLATE REDUCTASE (EC 1.5.1.2) (P5CR) (PYRROLINE-5-CARBOXYLATE REDUCTASE)                                                                                                          |
| UMP5K       | ENSG00000143179 | URIDINE-CYTIDINE KINASE 2 (EC 2.7.1.48) (UCK 2) (URIDINE 5-PHOSPHATE CYTIDYLTRANSFERASE 2) (URIDINE 5-PHOSPHATE CYTIDYLTRANSFERASE 2)                                                              |
| LRP8        | ENSG00000157193 | APOLIPOPROTEIN E RECEPTOR 2, ISOFORM 3 PRECURSOR; DUAL SPECIFICITY PROTEIN PHOSPHATASE 14 (EC 3.1.3.48) (DUAL SPECIFICITY PROTEIN PHOSPHATASE 14)                                                  |
| DUSP14      | ENSG00000161326 | DUAL SPECIFICITY PROTEIN PHOSPHATASE 14 (EC 3.1.3.48) (DUAL SPECIFICITY PROTEIN PHOSPHATASE 14)                                                                                                    |
| METAP1      | ENSG00000164024 | METHIONINE AMINOPEPTIDASE 1 (EC 3.4.11.18) (METAP 1) (PHOSPHATIDYL METHYLTRANSFERASE 1) (PHOSPHATIDYL METHYLTRANSFERASE 1)                                                                         |
| ABCE1       | ENSG00000164163 | ATP-BINDING CASSETTE SUB-FAMILY E MEMBER 1 (RNASE L) (ABCE1)                                                                                                                                       |
| PA2G4       | ENSG00000170515 | PROLIFERATION-ASSOCIATED PROTEIN 2G4 (CELL CYCLE PROTEIN) (PA2G4)                                                                                                                                  |
| BOP1        | ENSG00000170727 | BLOCK OF PROLIFERATION 1. [Source:SWISSPROT;Acc:Q1413]block of proliferation 1 (BOP1)                                                                                                              |
| RANBP1      | ENSG00000170987 | RAN binding protein 1Cluster Incl. D38076:Human mRNA for RanE (RANBP1)                                                                                                                             |
| CTPS        | ENSG00000171793 | CTP SYNTHASE (EC 6.3.4.2) (UTP--AMMONIA LIGASE) (CTP SYNTHASE)                                                                                                                                     |
| TRAP1       | ENSG00000178436 | heat shock protein 75U12595 /FEATURE= /DEFINITION=HSU125 (TRAP1)                                                                                                                                   |
| HSPD1       | ENSG00000178461 | SHORT HEAT SHOCK PROTEIN 60 HSP60S2. [Source:SPTREMB (HSPD1)                                                                                                                                       |
| PFAS        | ENSG00000178921 | PHOSPHORIBOSYLFORMYLGLYCINAMIDINE SYNTHASE (EC 2.4.1.19) (ADENOSYLTRANSFERASE 2) (ADENOSYLTRANSFERASE 2)                                                                                           |
| TEAD4       | ENSG00000179162 | TRANSCRIPTIONAL ENHANCER FACTOR TEF-3 (TEA DOMAIN) (TEAD4)                                                                                                                                         |
| MIF         | ENSG00000179677 | macrophage migration inhibitory factor (glycosylation-inhibiting factor) (MIF)                                                                                                                     |
| VAR52       | ENSG00000180181 | VALYL-TRNA SYNTHETASE 2 (EC 6.1.1.9) (VALINE--TRNA LIGASE) (VALYL-TRNA SYNTHETASE 2)                                                                                                               |
| CENTG1      | ENSG00000181137 | centaurin, gamma 1Cluster Incl. D79989:Human mRNA for KIAA01 (CENTG1)                                                                                                                              |
| DSCR2       | ---             | leucine rich proteinDown syndrome critical region gene 2 /// Down syndrome critical region gene 2                                                                                                  |
| JAG2        | ---             | Jagged 2jagged 2Cluster Incl. AF029778: Homo sapiens Jagged2 (cAMP-dependent protein kinase type I beta regulatory subunit) (JAG2)                                                                 |
| PRKAR1B     | ---             | MAC30hypothetical protein MAC30Cluster Incl. L19183: Human M (PRKAR1B)                                                                                                                             |
| n.a.        | ---             | MEGAKARYOCYTE-ASSOCIATED TYROSINE-PROTEIN KINASE (PRKAR1B)                                                                                                                                         |
| MATK        | ENSG00000007264 | ISOLEUCYL-TRNA SYNTHETASE, CYTOPLASMIC (EC 6.1.1.5) (ISOLEUCYL-TRNA SYNTHETASE, CYTOPLASMIC)                                                                                                       |
| IARS        | ENSG00000021374 | (ISOLEUCYL-TRNA SYNTHETASE, CYTOPLASMIC) (IARS)                                                                                                                                                    |
| GAL         | ENSG00000069482 | GALANIN PRECURSOR [CONTAINS: GALANIN; GALANIN MESSAGE] (GAL)                                                                                                                                       |
| MCAM        | ENSG00000076706 | CELL SURFACE GLYCOPROTEIN MUC18 PRECURSOR (MELAI) (MCAM)                                                                                                                                           |
| CAD         | ENSG00000084774 | CAD PROTEIN [INCLUDES: GLUTAMINE-DEPENDENT CARBANIONIC AMINO ACID ISOMERASE, MITOCHONDRIAL PRECURSOR (EC 5.4.1.1) (GLUTAMINE-DEPENDENT CARBANIONIC AMINO ACID ISOMERASE, MITOCHONDRIAL PRECURSOR)] |
| FH          | ENSG00000091483 | FUMARATE HYDRATASE, MITOCHONDRIAL PRECURSOR (EC 4.2.1.24) (FUMARATE HYDRATASE, MITOCHONDRIAL PRECURSOR)                                                                                            |
| SRPK1       | ENSG00000096063 | SFRS PROTEIN KINASE 1; SR PROTEIN KINASE 1. [Source:RefSeq;Acc:NM_001196757]SR protein kinase 1 (SRPK1)                                                                                            |
| NEFH        | ENSG00000100285 | NEUROFILAMENT TRIPLET H PROTEIN (200 KDA NEUROFILAMENT TRIPLET H PROTEIN)                                                                                                                          |
| NP          | ENSG00000100831 | PURINE NUCLEOSIDE PHOSPHORYLASE (EC 2.4.2.1) (INOSINE 5-PHOSPHATASE) (NP)                                                                                                                          |
| AHCY        | ENSG00000101444 | ADENOSYLHOMOCYSTEINASE (EC 3.3.1.1) (S-ADENOSYL-L-HOMOCYSTEINASE) (AHCY)                                                                                                                           |
| POLD2       | ENSG00000106628 | DNA POLYMERASE DELTA SUBUNIT 2 (EC 2.7.7.7). [Source:SWISSPROT;Acc:P09622]DNA polymerase delta subunit 2 (POLD2)                                                                                   |
| C1QBP       | ENSG00000108561 | COMPLEMENT COMPONENT 1, Q SUBCOMPONENT BINDING PROTEIN (C1QBP)                                                                                                                                     |
| CAMKK2      | ENSG00000110931 | CALCIUM/CALMODULIN-DEPENDENT PROTEIN KINASE KINASE 2 (CAMKK2)                                                                                                                                      |
| n.a.        | ENSG00000111234 | PROTEIN PREDICTED BY CLONE 23733. [Source:RefSeq;Acc:NM_001112334]protein predicted by clone 23733 (n.a.)                                                                                          |
| BYSL        | ENSG00000112578 | BYSTIN. [Source:SWISSPROT;Acc:Q13895]bystin-like /// bystin-like                                                                                                                                   |
| NUP155      | ENSG00000113569 | NUCLEAR PORE COMPLEX PROTEIN NUP155 (NUCLEOPORIN) (NUP155)                                                                                                                                         |

| HGNC Symbol | Ensembl ID      | Gene Description                                               |
|-------------|-----------------|----------------------------------------------------------------|
| IFRD2       | ENSG00000114366 | N-ACETYLTRANSFERASE 6 (EC 2.3.1.-) (FUS-2 PROTEIN) (FUS        |
| MRPL3       | ENSG00000114686 | MITOCHONDRIAL 60S RIBOSOMAL PROTEIN L3 (L3MT). [Sourc          |
| HSPE1       | ENSG00000115541 | 10 KDA HEAT SHOCK PROTEIN, MITOCHONDRIAL (HSP10) (10           |
| HSPE1       | ENSG00000115541 | 10 KDA HEAT SHOCK PROTEIN, MITOCHONDRIAL (HSP10) (10           |
| n.a.        | ENSG00000115946 | PUTATIVE 28 KDA PROTEIN. [Source:RefSeq;Acc:NM_020143          |
| EBNA1BP2    | ENSG00000117395 | PROBABLE RRNA PROCESSING PROTEIN EBP2 (EBNA1 BIND              |
| TNFRSF8     | ENSG00000120949 | TUMOR NECROSIS FACTOR RECEPTOR SUPERFAMILY MEME                |
| PRDX4       | ENSG00000123131 | PEROXIREDOXIN 4 (EC 1.11.1.-) (PRX-IV) (THIOREDOXIN PERI       |
| CSE1L       | ENSG00000124207 | IMPORTIN-ALPHA RE-EXPORTER (CHROMOSOME SEGREGATI               |
| RPP40       | ENSG00000124787 | RIBONUCLEASE P PROTEIN SUBUNIT P40 (EC 3.1.26.5) (RNA5         |
| n.a.        | ENSG00000125912 | hypothetical protein from EUROIMAGE 2021883Cluster Incl. AI867 |
| HRMT1L2     | ENSG00000126457 | PROTEIN ARGININE N-METHYLTRANSFERASE 1 (EC 2.1.1.-) (I         |
| n.a.        | ENSG00000132877 | KIAA1026 proteinCluster Incl. AB028949:Homo sapiens mRNA for   |
| n.a.        | ENSG00000136933 | RAB9 EFFECTOR P40. [Source:RefSeq;Acc:NM_005833]Rab9 ef        |
| MADH4       | ENSG00000141646 | MOTHERS AGAINST DECAPENTAPLEGIC HOMOLOG 4 (SMAD                |
| IL9         | ENSG00000145839 | INTERLEUKIN-9 PRECURSOR (IL-9) (T-CELL GROWTH FACTOR           |
| PDCD11      | ENSG00000148843 | RRP5 PROTEIN HOMOLOG (FRAGMENT). [Source:SWISSPROT             |
| HK2         | ENSG00000159399 | HEXOKINASE, TYPE II (EC 2.7.1.1) (HK II) (MUSCLE FORM HEX      |
| PWP2H       | ENSG00000160220 | PERIODIC TRYPTOPHAN PROTEIN 2 HOMOLOG. [Source:SWIS            |
| n.a.        | ENSG00000161813 | C-MPL BINDING PROTEIN. [Source:RefSeq;Acc:NM_052879]c-M        |
| NOLC1       | ENSG00000166197 | NUCLEOLAR PHOSPHOPROTEIN P130 (NUCLEOLAR 130 KDA               |
| NOLC1       | ENSG00000166197 | NUCLEOLAR PHOSPHOPROTEIN P130 (NUCLEOLAR 130 KDA               |
| CCT2        | ENSG00000166226 | T-COMPLEX PROTEIN 1, BETA SUBUNIT (TCP-1-BETA) (CCT-BI         |
| DTYMK       | ENSG00000168393 | THYMIDYLATE KINASE (EC 2.7.4.9) (DTMP KINASE). [Source:SV      |
| HNRPAB      | ENSG00000169162 | HETEROGENEOUS NUCLEAR RIBONUCLEOPROTEIN AB ISOF                |
| FASN        | ENSG00000169710 | FATTY ACID SYNTHASE (EC 2.3.1.85) [INCLUDES: EC 2.3.1.38;      |
| FASN        | ENSG00000169710 | FATTY ACID SYNTHASE (EC 2.3.1.85) [INCLUDES: EC 2.3.1.38;      |
| NMB         | ENSG00000177279 | NEUROMEDIN B-32 PRECURSOR [CONTAINS: NEUROMEDIN B              |
| CHC1        | ENSG00000180198 | RCC1chromosome condensation 1 /// chromosome condensation      |
| KIAA0179    | ---             | cDNA DKFZp586K1318Cluster Incl. AL049382:Homo sapiens mRNA f   |
| NTHL1       | ENSG00000065057 | KIAA0179KIAA0179Cluster Incl. D80001:Human mRNA for KIAA0      |
| UNG         | ENSG00000076248 | NTH ENDONUCLEASE III-LIKE 1 (E. COLI); NTH (E.COLI ENDO        |
| KIAA0020    | ENSG00000080608 | URACIL-DNA GLYCOSYLASE, MITOCHONDRIAL PRECURSOR                |
| n.a.        | ENSG00000086189 | KIAA0020Cluster Incl. D13645:Human mRNA for KIAA0020 gene,     |
| n.a.        | ENSG00000100304 | PROBABLE DIMETHYLADENOSINE TRANSFERASE (EC 2.1.1.-             |
| POLE2       | ENSG00000100479 | KIAA0153 proteinCluster Incl. D63487:Human mRNA for KIAA015    |
| MTHFD1      | ENSG00000100714 | DNA POLYMERASE EPSILON SUBUNIT B (EC 2.7.7.7) (DNA PO          |
| NOL5A       | ENSG00000101361 | C-1-TETRAHYDROFOLATE SYNTHASE, CYTOPLASMIC (C1-TH              |
| PRPS2       | ENSG00000101911 | NUCLEOLAR PROTEIN NOP56 (NUCLEOLAR PROTEIN 5A). [Sc            |
| RUVBL2      | ENSG00000104818 | RIBOSE-PHOSPHATE PYROPHOSPHOKINASE II (EC 2.7.6.1) (F          |
| GPI         | ENSG00000105220 | CHORIOGONADOTROPIN BETA CHAIN PRECURSOR (CHORIC                |
| n.a.        | ENSG00000106305 | GLUCOSE-6-PHOSPHATE ISOMERASE (EC 5.3.1.9) (GPI) (PHO          |
| NPM3        | ENSG00000107833 | MULTISYNTHETASE COMPLEX AUXILIARY COMPONENT P38 (              |
| n.a.        | ENSG00000110104 | NUCLEOPLASMIN 3. [Source:SWISSPROT;Acc:O75607]nucleopl         |
| CDC20       | ENSG00000117399 | hypothetical protein MGC2574Cluster Incl. AA195301:zr36g11.r1  |
| n.a.        | ENSG00000119812 | CELL DIVISION CYCLE 20; CELL DIVISION CYCLE 20, S.CEREV        |
| PRKDC       | ENSG00000121031 | DKFZP564F0522 proteinCluster Incl. AL049943:Homo sapiens mF    |
| CKS2        | ENSG00000123975 | DNA-DEPENDENT PROTEIN KINASE CATALYTIC SUBUNIT (EC             |
| CSE1L       | ENSG00000124207 | CYCLIN-DEPENDENT KINASES REGULATORY SUBUNIT 2 (CK              |
| EEF1E1      | ENSG00000124802 | IMPORTIN-ALPHA RE-EXPORTER (CHROMOSOME SEGREGATI               |
| HRMT1L2     | ENSG00000126457 | MULTISYNTHETASE COMPLEX AUXILIARY COMPONENT P18.               |
| n.a.        | ENSG00000127564 | PROTEIN ARGININE N-METHYLTRANSFERASE 1 (EC 2.1.1.-) (I         |
| TST         | ENSG00000128311 | MEMBRANE-ASSOCIATED TYROSINE- AND THREONINE-SPEC               |
| DKC1        | ENSG00000130826 | THIOSULFATE SULFURTRANSFERASE (EC 2.8.1.1) (RHODANE            |
| RAN         | ENSG00000132341 | DYSKERIN (NUCLEOLAR PROTEIN NAP57) (CBF5 HOMOLOG)              |
| PDGFRA      | ENSG00000134853 | GTP-BINDING NUCLEAR PROTEIN RAN (TC4) (RAN GTPASE) (           |
|             |                 | ALPHA PLATELET-DERIVED GROWTH FACTOR RECEPTOR PF               |

| HGNC Symbol | Ensembl ID       | Gene Description                                                    |
|-------------|------------------|---------------------------------------------------------------------|
| CDK4        | ENSG00000135446  | CELL DIVISION PROTEIN KINASE 4 (EC 2.7.1.-) (CYCLIN-DEPE            |
| ALDH1B1     | ENSG00000137124  | mitochondrial aldehyde dehydrogenase x genealdehyde dehydrog        |
| SORD        | ENSG00000140263  | SORBITOL DEHYDROGENASE (EC 1.1.1.14) (L-IDITOL 2-DEHYD              |
| BDH         | ENSG00000161267  | D-BETA-HYDROXYBUTYRATE DEHYDROGENASE, MITOCHON                      |
| GMPS        | ENSG00000163655  | GMP SYNTHASE [GLUTAMINE-HYDROLYZING] (EC 6.3.5.2) (GL               |
| GPR30       | ENSG00000164850  | CHEMOKINE RECEPTOR-LIKE 2 (IL8-RELATED RECEPTOR DR                  |
| PHB         | ENSG00000167085  | PROHIBITIN. [Source:SWISSPROT;Acc:P35232]prohibitinCluster          |
| STRA13      | ENSG00000169689  | stimulated by retinoic acid 13Cluster Incl. U95006:Human D9 splice  |
| XPOT        | ENSG00000175719  | exportin texportin, tRNA (nuclear export receptor for tRNAs)Cluster |
| SMN1        | ENSG00000179850  | SURVIVAL OF MOTOR NEURON (hSMN)survival of motor neuron             |
| CHC1        | ENSG00000180198  | REGULATOR OF CHROMOSOME CONDENSATION (CELL CYCL                     |
| PLK1        | ENSG00000181598  | SERINE/THREONINE-PROTEIN KINASE PLK (EC 2.7.1.-) (PLK-1             |
| n.a.        | ---              | protein arginine N-methyltransferase 3 (PRMT3)protein arginine N-   |
| AK2         | ENSG000000004455 | ADENYLATE KINASE ISOENZYME 2, MITOCHONDRIAL (EC 2.7                 |
| n.a.        | ENSG000000006634 | ACTIVATOR OF S PHASE KINASE. [Source:RefSeq;Acc:NM_006              |
| MGST1       | ENSG000000008394 | MICROSOMAL GLUTATHIONE S-TRANSFERASE 1 (EC 2.5.1.18                 |
| CSDA        | ENSG000000060138 | DNA-BINDING PROTEIN A (COLD SHOCK DOMAIN PROTEIN A)                 |
| n.a.        | ENSG000000065485 | PROTEIN DISULFIDE ISOMERASE A5 PRECURSOR (EC 5.3.4.1                |
| ATP1B3      | ENSG000000069849 | SODIUM/POTASSIUM-TRANSPORTING ATPASE BETA-3 CHAIN                   |
| BCS1L       | ENSG000000074582 | BCS1-LIKE (YEAST); BCS1 (YEAST HOMOLOG)-LIKE. [Source:F             |
| UNG         | ENSG000000076248 | URACIL-DNA GLYCOSYLASE, MITOCHONDRIAL PRECURSOR                     |
| PBP         | ENSG000000089220 | PHOSPHATIDYLETHANOLAMINE-BINDING PROTEIN (PEBP) (N                  |
| CDC6        | ENSG000000094804 | CDC6 HOMOLOG; CDC6 (CELL DIVISION CYCLE 6, S. CEREVIS               |
| CDC7        | ENSG000000097046 | CELL DIVISION CYCLE 7-RELATED PROTEIN KINASE (EC 2.7.1              |
| MTAP        | ENSG000000099810 | 5'-METHYLTHIOADENOSINE PHOSPHORYLASE (EC 2.4.2.28) (                |
| ADSL        | ENSG00000100357  | ADENYLOSUCCINATE LYASE (EC 4.3.2.2) (ADENYLOSUCCINA                 |
| CDKN3       | ENSG00000100526  | CYCLIN-DEPENDENT KINASE INHIBITOR 3 (EC 3.1.3.48) (EC 3.            |
| VRK1        | ENSG00000100749  | VACCINIA RELATED KINASE 1; VACCINIA-RELATED KINASE-1.               |
| WFDC2       | ENSG00000101443  | MAJOR EPIDIDYMI-SPECIFIC PROTEIN E4 PRECURSOR (HE                   |
| GSPT1       | ENSG00000103342  | G1 TO S PHASE TRANSITION PROTEIN 1 HOMOLOG (GTP-BIN                 |
| SLC39A14    | ENSG00000104635  | KIAA0062solute carrier family 39 (zinc transporter), member 14Clu   |
| n.a.        | ENSG00000105677  | SEVEN TRANSMEMBRANE DOMAIN PROTEIN. [Source:RefSeq                  |
| RLN2        | ENSG00000107014  | PRORELAXIN H2 PRECURSOR. [Source:SWISSPROT;Acc:P040                 |
| BAG2        | ENSG00000112208  | BAG-FAMILY MOLECULAR CHAPERONE REGULATOR-2. [Sourc                  |
| HSD17B8     | ENSG00000112474  | ESTRADIOL 17 BETA-DEHYDROGENASE 8 (EC 1.1.1.62) (17-BE              |
| UCHL3       | ENSG00000118939  | UBIQUITIN CARBOXYL-TERMINAL HYDROLASE ISOZYME L3 (I                 |
| NME2        | ENSG00000121054  | NUCLEOSIDE DIPHOSPHATE KINASE B (EC 2.7.4.6) (NDK B) (N             |
| MRPS12      | ENSG00000128626  | 28S RIBOSOMAL PROTEIN S12, MITOCHONDRIAL PRECURSOR                  |
| PCNA        | ENSG00000132646  | PROLIFERATING CELL NUCLEAR ANTIGEN (PCNA) (CYCLIN).                 |
| DPH2L2      | ENSG00000132768  | DIPHTHAMIDE BIOSYNTHESIS-LIKE PROTEIN 2. [Source:RefSe              |
| CCNB1       | ENSG00000134057  | G2/MITOTIC-SPECIFIC CYCLIN B1. [Source:SWISSPROT;Acc:P1             |
| MC1R        | ENSG00000141037  | TUBULIN BETA-4 CHAIN (TUBULIN BETA-III). [Source:SWISSPR            |
| SOD1        | ENSG00000142168  | SUPEROXIDE DISMUTASE [CU-ZN] (EC 1.15.1.1). [Source:SWIS            |
| ATP5G3      | ENSG00000154518  | ATP SYNTHASE LIPID-BINDING PROTEIN, MITOCHONDRIAL P                 |
| CCT3        | ENSG00000163468  | T-COMPLEX PROTEIN 1, GAMMA SUBUNIT (TCP-1-GAMMA) (C                 |
| RFC4        | ENSG00000163918  | ACTIVATOR 1 37 KDA SUBUNIT (REPLICATION FACTOR C 37 K               |
| CDC25A      | ENSG00000164045  | M-PHASE INDUCER PHOSPHATASE 1 (EC 3.1.3.48) (DUAL SPE               |
| FRDA        | ENSG00000165060  | FRATAXIN, MITOCHONDRIAL PRECURSOR (FRIEDREICH'S AT                  |
| SNRPD1      | ENSG00000167088  | SMALL NUCLEAR RIBONUCLEOPROTEIN SM D1 (SNRNP COR                    |
| CHAF1A      | ENSG00000167670  | CHROMATIN ASSEMBLY FACTOR 1 SUBUNIT A (CAF-1 SUBUN                  |
| PRDX2       | ENSG00000167815  | PEROXIREDOXIN 2 (EC 1.11.1.-) (THIOREDOXIN PEROXIDASE               |
| BUB1        | ENSG00000169679  | MITOTIC CHECKPOINT SERINE/THREONINE-PROTEIN KINASE                  |
| CDC2        | ENSG00000170312  | CELL DIVISION CONTROL PROTEIN 2 HOMOLOG (EC 2.7.1.-) (              |
| POLR1C      | ENSG00000171453  | DNA-DIRECTED RNA POLYMERASE I 40 KDA POLYPEPTIDE (E                 |
| SLC19A1     | ENSG00000173638  | FOLATE TRANSPORTER 1 (PLACENTAL FOLATE TRANSPORTI                   |
| TOMM20      | ENSG00000173726  | MITOCHONDRIAL IMPORT RECEPTOR SUBUNIT TOM20 HOMOC                   |
| MMP3        | ENSG00000175007  | STROMELYSIN-1 PRECURSOR (EC 3.4.24.17) (MATRIX METALI               |

| HGNC Symbol | Ensembl ID      | Gene Description                                                      |
|-------------|-----------------|-----------------------------------------------------------------------|
| UBE2C       | ENSG00000175063 | UBIQUITIN-CONJUGATING ENZYME E2 C (EC 6.3.2.19) (UBIQU                |
| PTPN2       | ENSG00000175354 | PROTEIN-TYROSINE PHOSPHATASE, NON-RECEPTOR TYPE ;                     |
| RUVBL1      | ENSG00000175792 | TATA BINDING PROTEIN INTERACTING PROTEIN 49 KDA; RUV                  |
| TYMS        | ENSG00000176890 | THYMIDYLATE SYNTHASE (EC 2.1.1.45) (TS) (TSASE). [Source:             |
| DDX10       | ENSG00000178105 | PROBABLE ATP-DEPENDENT RNA HELICASE DDX10 (DEAD-B                     |
| TUFM        | ENSG00000178952 | ELONGATION FACTOR TU, MITOCHONDRIAL PRECURSOR (EI                     |
| AURKB       | ENSG00000178999 | SERINE/THREONINE PROTEIN KINASE 12 (EC 2.7.1.37) (AURC                |
| RRS1        | ENSG00000179041 | RIBOSOME BIOGENESIS REGULATORY PROTEIN HOMOLOG.                       |
| GEMIN4      | ENSG00000179409 | COMPONENT OF GEMS 4 (GEMIN4) (P97). [Source:SWISSPRO                  |
| PTMA        | ENSG00000181571 | PROTHYMOSIN A14. [Source:RefSeq;Acc:NM_016171]prothymos               |
| CYP51A1     | ENSG00000001630 | CYTOCHROME P450 51 (EC 1.14.14.-) (CYPL1) (P450L1) (STER              |
| ARHGEF5     | ENSG00000050327 | RHO GUANINE NUCLEOTIDE EXCHANGE FACTOR 5 (GUANINI                     |
| KIAA0690    | ENSG00000052749 | KIAA0690Cluster Incl. AB014590:Homo sapiens mRNA for KIAA06           |
| VDAC1       | ENSG00000073905 | VOLTAGE-DEPENDENT ANION-SELECTIVE CHANNEL PROTEIN                     |
| DDX1        | ENSG00000079785 | ATP-DEPENDENT HELICASE DDX1 (DEAD-BOX PROTEIN 1) (D                   |
| SCAMP1      | ENSG00000085365 | SECRETORY CARRIER-ASSOCIATED MEMBRANE PROTEIN 1.                      |
| DDX18       | ENSG00000088205 | ATP-DEPENDENT RNA HELICASE DDX18 (DEAD-BOX PROTEIN                    |
| PES1        | ENSG00000100029 | PESCADILLO HOMOLOG 1. [Source:SWISSPROT;Acc:O00541]p                  |
| RANGAP1     | ENSG00000100401 | RAN-GTPASE ACTIVATING PROTEIN 1. [Source:SWISSPROT;Ac                 |
| APEX1       | ENSG00000100823 | DNA-(APURINIC OR APYRIMIDINIC SITE) LYASE (EC 4.2.99.18)              |
| MYBL2       | ENSG00000101057 | MYB-RELATED PROTEIN B (B-MYB). [Source:SWISSPROT;Acc:f                |
| USP10       | ENSG00000103194 | UBIQUITIN CARBOXYL-TERMINAL HYDROLASE 10 (EC 3.1.2.1;                 |
| n.a.        | ENSG00000104613 | hypothetical protein FLJ10569Cluster Incl. W27152:23h11 Homo s        |
| RPA3        | ENSG00000106399 | REPLICATION PROTEIN A 14 KDA SUBUNIT (RP-A) (RF-A) (REF               |
| CXCL12      | ENSG00000107562 | stromal cell derived factor 1 precursor (SDF1); pre B-cell growth sti |
| n.a.        | ENSG00000109184 | KIAA0276 proteinCluster Incl. D87466:Human mRNA for KIAA0276          |
| MCM3        | ENSG00000112118 | DNA REPLICATION LICENSING FACTOR MCM3 (DNA POLYMER                    |
| GMNN        | ENSG00000112312 | GEMININ. [Source:SWISSPROT;Acc:O75496]                                |
| HSPA9B      | ENSG00000113013 | STRESS-70 PROTEIN, MITOCHONDRIAL PRECURSOR (75 KDA/                   |
| TCERG1      | ENSG00000113649 | TRANSCRIPTION ELONGATION REGULATOR 1; TRANSCRIPTI                     |
| RNU3IP2     | ENSG00000114767 | U3 SNORNP-ASSOCIATED 55-KDA PROTEIN. [Source:RefSeq;A                 |
| SFRS7       | ENSG00000115875 | SPLICING FACTOR, ARGININE/SERINE-RICH 7 (SPLICING FAC                 |
| MSH6        | ENSG00000116062 | DNA MISMATCH REPAIR PROTEIN MSH6 (MUTS-ALPHA 160 KI                   |
| CENPF       | ENSG00000117724 | CENP-F KINETOCHORE PROTEIN (CENTROMERE PROTEIN F                      |
| MXI1        | ENSG00000119950 | MAX INTERACTING PROTEIN 1 (MXI1 PROTEIN). [Source:SWIS                |
| AMD1        | ENSG00000123505 | S-ADENOSYLMETHIONINE DECARBOXYLASE PROENZYME (E                       |
| ELK1        | ENSG00000126767 | ETS-DOMAIN PROTEIN ELK-1. [Source:SWISSPROT;Acc:P1941                 |
| ILF3        | ENSG00000129351 | INTERLEUKIN ENHANCER-BINDING FACTOR 3 (NUCLEAR FAC                    |
| TFDP1       | ENSG00000130266 | TRANSCRIPTION FACTOR DP-1 (E2F DIMERIZATION PARTNEF                   |
| n.a.        | ENSG00000130713 | EXOSOME COMPLEX EXONUCLEASE RRP4 (EC 3.1.13.-) (RIB                   |
| TOP2A       | ENSG00000131747 | DNA TOPOISOMERASE II, ALPHA ISOZYME (EC 5.99.1.3). [Sour              |
| EIF5A       | ENSG00000132507 | EUKARYOTIC TRANSLATION INITIATION FACTOR 5A (EIF-5A) (                |
| n.a.        | ENSG00000132763 | DKFZP564I122 protein /// DKFZP564I122 proteinCluster Incl. AL08       |
| n.a.        | ENSG00000136718 | U3 snoRNP protein 4 homologCluster Incl. AF054996:Homo sapien         |
| ATIC        | ENSG00000138363 | BIFUNCTIONAL PURINE BIOSYNTHESIS PROTEIN PURH [INCL                   |
| ATIC        | ENSG00000138363 | BIFUNCTIONAL PURINE BIOSYNTHESIS PROTEIN PURH [INCL                   |
| PEX5        | ENSG00000139197 | PEROXISOMAL TARGETING SIGNAL 1 RECEPTOR (PEROXISM                     |
| TAF4B       | ENSG00000141384 | TRANSCRIPTION INITIATION FACTOR TFIID 105 KDA SUBUNIT                 |
| HDGF        | ENSG00000143321 | HEPATOMA-DERIVED GROWTH FACTOR (HDGF) (HIGH-MOBIL                     |
| HDGF        | ENSG00000143321 | HEPATOMA-DERIVED GROWTH FACTOR (HDGF) (HIGH-MOBIL                     |
| ILF2        | ENSG00000143621 | INTERLEUKIN ENHANCER BINDING FACTOR 2; NUCLEAR FAC                    |
| CCNA2       | ENSG00000145386 | CYCLIN A2 (CYCLIN A). [Source:SWISSPROT;Acc:P20248]cyclin             |
| MDH2        | ENSG00000146701 | MALATE DEHYDROGENASE, MITOCHONDRIAL PRECURSOR (                       |
| PEG10       | ENSG00000146743 | PATERNALLY EXPRESSED 10. [Source:RefSeq;Acc:NM_015068                 |
| PPRC1       | ENSG00000148840 | peroxisome proliferative activated receptor, gamma, coactivator-rel   |
| SSRP1       | ENSG00000149136 | STRUCTURE-SPECIFIC RECOGNITION PROTEIN 1 (SSRP1) (R                   |
| PTK9        | ENSG00000151239 | PTK9 PROTEIN TYROSINE KINASE 9; PROTEIN TYROSINE KIN                  |

**HGNC Symbol Ensembl ID**

ACSL1 ENSG00000151726  
 PFKM ENSG00000152556  
 HNRPD1 ENSG00000152795  
 RPIA ENSG00000153574  
 SLC16A1 ENSG00000155380  
 KCNJ6 ENSG00000157542  
 SFRS2 ENSG00000161547  
 PRKCI ENSG00000163558  
 POLR2H ENSG00000163882  
 ABCE1 ENSG00000164163  
 MELK ENSG00000165304  
 DDX21 ENSG00000165732  
 SSSCA1 ENSG00000173465  
 n.a. ENSG00000175602  
 HSPCA ENSG00000176668  
 DEAF1 ENSG00000177030  
 n.a. ENSG00000177176  
 EIF1AX ENSG00000179112  
 n.a. ENSG00000180997  
 n.a. ENSG00000181708  
 SF3A3 ---  
 n.a. ---  
 AK2 ENSG00000004455  
 PLAUR ENSG00000011422  
 SCARB1 ENSG00000073060  
 MCM2 ENSG00000073111  
 EXOSC7 ENSG00000075914  
 KHSRP ENSG00000088247  
 NUDC ENSG00000090273  
 CGRRF1 ENSG00000100532  
 APEX1 ENSG00000100823  
 GARS ENSG00000106105  
 EIF3S9 ENSG00000106263  
 IMPDH1 ENSG00000106348  
 VEGF ENSG00000112715  
 TFDP2 ENSG00000114126  
 PRDX1 ENSG00000117450  
 SCO2 ENSG00000130489  
 TUBG1 ENSG00000131462  
 MYCN ENSG00000134323  
 ABL2 ENSG00000143322  
 SLC20A1 ENSG00000144136  
 CDKN2B ENSG00000147883  
 n.a. ENSG00000162568  
 FANCG ENSG00000165281  
 PMPCA ENSG00000165688  
 PSMC3 ENSG00000165916  
 MCM7 ENSG00000166508  
 ABCA3 ENSG00000167972  
 EIF4EBP1 ENSG00000169150  
 TNFRSF4 ENSG00000174608  
 SRP72 ENSG00000174780  
 ALG3 ENSG00000175142  
 CKS1B ENSG00000178556  
 NSEP1 ENSG00000178563  
 FARSLA ENSG00000179115  
 PRIM1 ENSG00000181494

**Gene Description**

LONG-CHAIN-FATTY-ACID--COA LIGASE 2 (EC 6.2.1.3) (LONG-  
 6-PHOSPHOFRUCTOKINASE, MUSCLE TYPE (EC 2.7.1.11) (PH  
 HETEROGENEOUS NUCLEAR RIBONUCLEOPROTEIN D-LIKE;  
 RIBOSE 5-PHOSPHATE ISOMERASE (EC 5.3.1.6) (PHOSPHORI  
 MONOCARBOXYLATE TRANSPORTER 1 (MCT 1). [Source:SWISS  
 G PROTEIN-ACTIVATED INWARD RECTIFIER POTASSIUM CHA  
 SPLICING FACTOR, ARGININE/SERINE-RICH 2 (SPLICING FAC  
 PROTEIN KINASE C, IOTA TYPE (EC 2.7.1.-) (NPKC-IOTA). [Sou  
 DNA-DIRECTED RNA POLYMERASES I, II, AND III 17.1 KDA POI  
 ATP-BINDING CASSETTE SUB-FAMILY E MEMBER 1 (RNASE L  
 MATERNAL EMBRYONIC LEUCINE ZIPPER KINASE. [Source:Re  
 NUCLEOLAR RNA HELICASE II (NUCLEOLAR RNA HELICASE C  
 SJOGREN'S SYNDROME/SCLERODERMA AUTOANTIGEN 1 (AI  
 DELTA-INTERACTING PROTEIN A (HEPATITIS DELTA ANTIGEN  
 HEAT SHOCK PROTEIN 86 (FRAGMENT). [Source:SPTREMBL;A  
 DEFORMED EPIDERMAL AUTOREGULATORY FACTOR 1 HOM  
 Cluster Incl. AL050035:Homo sapiens mRNA; cDNA DKFZp566H0  
 EUKARYOTIC TRANSLATION INITIATION FACTOR 1A, X-CHRO  
 MY016 PROTEIN. [Source:SPTREMBL;Acc:Q9H3K6]hypothetical  
 DKFZP564K2062 proteinCluster Incl. AL080088:Homo sapiens mF  
 splicing factor SF3a60splicing factor 3a, subunit 3, 60kDa /// splicir  
 cDNA clone EUROIMAGE 39515Cluster Incl. AL079283:Homo sap  
 ADENYLATE KINASE ISOENZYME 2, MITOCHONDRIAL (EC 2.7  
 UROKINASE PLASMINOGEN ACTIVATOR SURFACE RECEPTO  
 SCAVENGER RECEPTOR CLASS B, MEMBER 1; CD36 ANTIGE  
 DNA REPLICATION LICENSING FACTOR MCM2 (NUCLEAR PRO  
 EXOSOME COMPLEX EXONUCLEASE RRP42 (EC 3.1.13.-) (RIE  
 KH-TYPE SPLICING REGULATORY PROTEIN (FUSE BINDING F  
 NUCLEAR DISTRIBUTION GENE C HOMOLOG (A. NIDULANS);  
 CELL GROWTH REGULATORY WITH RING FINGER DOMAIN. [S  
 DNA-(APURINIC OR APYRIMIDINIC SITE) LYASE (EC 4.2.99.18)  
 GLYCYL-TRNA SYNTHETASE (EC 6.1.1.14) (GLYCINE--TRNA LI  
 EUKARYOTIC TRANSLATION INITIATION FACTOR 3 SUBUNIT 3  
 INOSINE-5'-MONOPHOSPHATE DEHYDROGENASE 1 (EC 1.1.1  
 VASCULAR ENDOTHELIAL GROWTH FACTOR A PRECURSOR  
 TRANSCRIPTION FACTOR DP-2 (E2F DIMERIZATION PARTNEF  
 PEROXIREDOXIN 1 (EC 1.11.1.-) (THIOREDOXIN PEROXIDASE  
 SCO2 PROTEIN HOMOLOG, MITOCHONDRIAL PRECURSOR. [S  
 TUBULIN GAMMA-1 CHAIN (GAMMA-1 TUBULIN) (GAMMA-TUB  
 N-MYC PROTO-ONCOGENE PROTEIN. [Source:SWISSPROT;Ac  
 TYROSINE-PROTEIN KINASE ABL2 (EC 2.7.1.112) (TYROSINE P  
 SOLUTE CARRIER FAMILY 20 (PHOSPHATE TRANSPORTER), I  
 CYCLIN-DEPENDENT KINASE 4 INHIBITOR B (P14-INK4B) (P15  
 DKFZP564C186 proteinCluster Incl. AL050019:Homo sapiens mR  
 FANCONI ANEMIA GROUP G PROTEIN (FACG PROTEIN) (DNA-  
 MITOCHONDRIAL PROCESSING PEPTIDASE ALPHA SUBUNIT,  
 26S PROTEASE REGULATORY SUBUNIT 6A (TAT-BINDING PRO  
 DNA REPLICATION LICENSING FACTOR MCM7 (CDC47 HOMO  
 ATP-BINDING CASSETTE, SUB-FAMILY A, MEMBER 3 (ATP-BIN  
 EUKARYOTIC TRANSLATION INITIATION FACTOR 4E BINDING  
 TUMOR NECROSIS FACTOR RECEPTOR SUPERFAMILY MEME  
 SIGNAL RECOGNITION PARTICLE 72 KDA PROTEIN (SRP72). [S  
 DOLICHYL-P-MAN:MAN(5)GLCNAC(2)-PP-DOLICHYL MANNOS'  
 CYCLIN-DEPENDENT KINASES REGULATORY SUBUNIT 1 (CK:  
 nuclease sensitive element binding protein 1 /// nuclease sensitive  
 PHENYLALANYL-TRNA SYNTHETASE ALPHA CHAIN (EC 6.1.1.1.  
 DNA PRIMASE SMALL SUBUNIT (EC 2.7.7.-) (DNA PRIMASE 49

**HGNC Symbol Ensembl ID**

TBL3 ---  
 JUND ---  
 PTBP1 ENSG00000011304  
 MRE11A ENSG00000020922  
 HSPA5 ENSG00000044574  
 OAT ENSG00000065154  
 TFRC ENSG00000072274  
 SHMT1 ENSG00000072465  
 CLNS1A ENSG00000074201  
 SEMA3C ENSG00000075223  
 MCAM ENSG00000076706  
 MAPKAPK5 ENSG00000089022  
 SIP1 ENSG00000092208  
 NF2 ENSG00000100305  
 SLC1A5 ENSG00000105281  
 PSMA2 ENSG00000106588  
 RAD51C ENSG00000108384  
 CTSC ENSG00000109861  
 HSPA8 ENSG00000109971  
 n.a. ENSG00000110108  
 IGFBP2 ENSG00000115457  
 DARS ENSG00000115866  
 UCHL3 ENSG00000118939  
 GTF3A ENSG00000122034  
 RPL5 ENSG00000122406  
 AMD1 ENSG00000123505  
 HSPA1A ENSG00000124567  
 SYNGR3 ENSG00000127561  
 NINJ1 ENSG00000131669  
 SNRPA1 ENSG00000131876  
 TAF9 ENSG00000134059  
 SYNCRIP ENSG00000135316  
 n.a. ENSG00000136270  
 ITGB3BP ENSG00000142856  
 PTPRF ENSG00000142949  
 CHEK1 ENSG00000149554  
 TCEB1 ENSG00000154582  
 n.a. ENSG00000155506  
 VBP1 ENSG00000155959  
 BUB1B ENSG00000156970  
 RACGAP1 ENSG00000161800  
 AK3 ENSG00000162433  
 HNRPF ENSG00000169813  
 PDAP1 ENSG00000176672  
 SELE ENSG00000007908  
 n.a. ENSG00000048162  
 RCN1 ENSG00000049449  
 GLDC ENSG00000049496  
 PMS1 ENSG00000064933  
 PFKF ENSG00000067057  
 PDCD2 ENSG00000071994  
 MGST2 ENSG00000085871  
 NDUFB7 ENSG00000099795  
 G22P1 ENSG00000100419  
 n.a. ENSG00000103226  
 PBEF1 ENSG00000105835  
 TBL2 ENSG00000106638

**Gene Description**

SazD (Transducin like protein)transducin (beta)-like 3Cluster Incl. l  
 jun D proto-oncogeneCluster Incl. X56681:Human junD mRNA /cd:  
 POLYPYRIMIDINE TRACT-BINDING PROTEIN 1 (PTB) (HETERC  
 DOUBLE-STRAND BREAK REPAIR PROTEIN MRE11A (MRE11 H  
 78 KDA GLUCOSE-REGULATED PROTEIN PRECURSOR (GRP  
 ORNITHINE AMINOTRANSFERASE, MITOCHONDRIAL PRECUF  
 TRANSFERRIN RECEPTOR PROTEIN 1 (TFR1) (TR) (TFR) (TRF  
 SERINE HYDROXYMETHYLTRANSFERASE, CYTOSOLIC (EC 2  
 CHLORIDE CONDUCTANCE REGULATORY PROTEIN ICLN (IIC  
 SEMAPHORIN 3C PRECURSOR (SEMAPHORIN E) (SEMA E). [S  
 CELL SURFACE GLYCOPROTEIN MUC18 PRECURSOR (MELAI  
 MITOGEN-ACTIVATED PROTEIN KINASE-ACTIVATED PROTEIN  
 SURVIVAL OF MOTOR NEURON PROTEIN-INTERACTING PRO  
 MERLIN (SCHWANNOMIN) (NEUROFIBROMIN 2). [Source:SWIS  
 NEUTRAL AMINO ACID TRANSPORTER B(0) (ATB(0)) (SODIUM  
 PROTEASOME SUBUNIT ALPHA TYPE 2 (EC 3.4.25.1) (PROTEA  
 DNA REPAIR PROTEIN RAD51 HOMOLOG 3. [Source:SWISSPR  
 DIPEPTIDYL-PEPTIDASE I PRECURSOR (EC 3.4.14.1) (DPP-I) (I  
 HEAT SHOCK COGNATE 71 KDA PROTEIN. [Source:SWISSPRC  
 hypothetical protein MGC5508Cluster Incl. N53547:yv43b12.s1 Ho  
 INSULIN-LIKE GROWTH FACTOR BINDING PROTEIN 2 PRECU  
 ASPARTYL-TRNA SYNTHETASE (EC 6.1.1.12) (ASPARTATE--TR  
 UBIQUITIN CARBOXYL-TERMINAL HYDROLASE ISOZYME L3 (I  
 TRANSCRIPTION FACTOR IIIA (FACTOR A) (TFIIIA). [Source:SW  
 60S RIBOSOMAL PROTEIN L5. [Source:SWISSPROT;Acc:P4677  
 S-ADENOSYLMETHIONINE DECARBOXYLASE PROENZYME (E  
 HEAT SHOCK 70 KDA PROTEIN 1 (HSP70.1) (HSP70-1/HSP70-2  
 SYNAPTOGYRIN 3. [Source:SWISSPROT;Acc:O43761]synaptoogy  
 NINJURIN 1 (NERVE INJURY-INDUCED PROTEIN 1). [Source:SV  
 U2 SMALL NUCLEAR RIBONUCLEOPROTEIN A' (U2 SNRNP-A')  
 TRANSCRIPTION INITIATION FACTOR TFIID 31 KDA SUBUNIT (I  
 NS1-ASSOCIATED PROTEIN 1. [Source:RefSeq;Acc:NM\_006372  
 CELL CYCLE PROGRESSION 2 PROTEIN. [Source:RefSeq;Acc:U  
 INTEGRIN BETA 3 BINDING PROTEIN (BETA3-ENDONEXIN); BE  
 LAR PROTEIN PRECURSOR (LEUKOCYTE ANTIGEN RELATED  
 SERINE/THREONINE-PROTEIN KINASE CHK1 (EC 2.7.1.-). [Sou  
 ELONGIN C; TRANSCRIPTION ELONGATION FACTOR B (SIII), I  
 likely ortholog of mouse Ia related proteinCluster Incl. AB018274:H  
 PREFOLDIN SUBUNIT 3 (VON HIPPEL-LINDAU BINDING PROTI  
 MITOTIC CHECKPOINT SERINE/THREONINE-PROTEIN KINASE  
 RAC GTPASE ACTIVATING PROTEIN 1; GTPASE ACTIVATING P  
 ADENYLATE KINASE ISOENZYME 4, MITOCHONDRIAL (EC 2.7  
 HETEROGENEOUS NUCLEAR RIBONUCLEOPROTEIN F (HNRI  
 PDGFA associated protein 1 /// PDGFA associated protein 1Cluste  
 E-SELECTIN PRECURSOR (ENDOTHELIAL LEUKOCYTE ADHE  
 PROTEIN CGI-117 (PROTEIN HSPC111). [Source:SWISSPROT;A  
 RETICULOCALBIN 1 PRECURSOR. [Source:SWISSPROT;Acc:Q  
 GLYCINE DEHYDROGENASE [DECARBOXYLATING], MITOCHC  
 PMS1 PROTEIN HOMOLOG 1 (DNA MISMATCH REPAIR PROTE  
 6-PHOSPHOFRUCTOKINASE, TYPE C (EC 2.7.1.11) (PHOSPHC  
 PROGRAMMED CELL DEATH PROTEIN 2 (ZINC FINGER PROTI  
 MICROSOMAL GLUTATHIONE S-TRANSFERASE 2 (EC 2.5.1.18  
 NADH-UBIQUINONE OXIDOREDUCTASE B18 SUBUNIT (EC 1.6  
 ATP-DEPENDENT DNA HELICASE II, 70 KDA SUBUNIT (LUPUS  
 PROTEIN PM5 PRECURSOR. [Source:SWISSPROT;Acc:Q15155  
 PRE-B CELL ENHANCING FACTOR PRECURSOR. [Source:SWI  
 TRANSDUCIN BETA-LIKE 2 PROTEIN (WS BETA-TRANSDUCIN



| HGNC Symbol | Ensembl ID       | Gene Description                                                                                                        |
|-------------|------------------|-------------------------------------------------------------------------------------------------------------------------|
| GCN5L2      | ENSG00000108773  | GENERAL CONTROL OF AMINO ACID SYNTHESIS PROTEIN 5-                                                                      |
| CDK2AP1     | ENSG00000111328  | CYCLIN-DEPENDENT KINASE 2-ASSOCIATED PROTEIN 1 (CDI                                                                     |
| NOL1        | ENSG00000111641  | PROLIFERATING-CELL NUCLEOLAR ANTIGEN P120 (PROLIFEI                                                                     |
| SLC29A1     | ENSG00000112759  | EQUILIBRATIVE NUCLEOSIDE TRANSPORTER 1 (EQUILIBRAT                                                                      |
| BNIP1       | ENSG00000113734  | BCL2/ADENOVIRUS E1B 19-KDA PROTEIN-INTERACTING PRO                                                                      |
| DBN1        | ENSG00000113758  | DREBRIN (DEVELOPMENTALLY REGULATED BRAIN PROTEIN;                                                                       |
| EIF4G1      | ENSG00000114867  | EUKARYOTIC TRANSLATION INITIATION FACTOR 4 GAMMA (É                                                                     |
| B4GALT2     | ENSG00000117411  | BETA-1,4-GALACTOSYLTRANSFERASE 2 (EC 2.4.1.-) (BETA-1,4                                                                 |
| TMEM5       | ENSG00000118600  | TRANSMEMBRANE PROTEIN 5; PUTATIVE TYPE II MEMBRANE                                                                      |
| FVT1        | ENSG00000119537  | FOLLICULAR VARIANT TRANSLOCATION PROTEIN 1 PRECUR                                                                       |
| ETF1        | ENSG00000120705  | EUKARYOTIC PEPTIDE CHAIN RELEASE FACTOR SUBUNIT 1                                                                       |
| ATF4        | ENSG00000128272  | CYCLIC-AMP-DEPENDENT TRANSCRIPTION FACTOR ATF-4 (A                                                                      |
| ILF3        | ENSG00000129351  | INTERLEUKIN ENHANCER-BINDING FACTOR 3 (NUCLEAR FAC                                                                      |
| RAMP1       | ENSG00000132329  | RECEPTOR ACTIVITY-MODIFYING PROTEIN 1 PRECURSOR (C                                                                      |
| n.a.        | ENSG00000134697  | AUTOANTIGEN NGP-1. [Source:SWISSPROT;Acc:Q13823]nuclec                                                                  |
| ADCY3       | ENSG00000138031  | ADENYLATE CYCLASE TYPE III (EC 4.6.1.1) (ADENYLATE CYCL                                                                 |
| AFG3L2      | ENSG00000141385  | AFG3-LIKE PROTEIN 2 (EC 3.4.24.-) (PARAPLEGIN-LIKE PROTE                                                                |
| PRPS1       | ENSG00000147224  | RIBOSE-PHOSPHATE PYROPHOSPHOKINASE I (EC 2.7.6.1) (P                                                                    |
| OPRS1       | ENSG00000147955  | TYPE I SIGMA RECEPTOR ISOFORM 1; SR31747 BINDING PRO                                                                    |
| TOMM70A     | ENSG00000154174  | MITOCHONDRIAL PRECURSOR PROTEINS IMPORT RECEPTC                                                                         |
| APRT        | ENSG00000158581  | ADENINE PHOSPHORIBOSYLTRANSFERASE (EC 2.4.2.7) (APF                                                                     |
| FGFR4       | ENSG00000160867  | FIBROBLAST GROWTH FACTOR RECEPTOR 4 PRECURSOR (I                                                                        |
| DEFA6       | ENSG00000164822  | DEFENSIN 6 PRECURSOR (DEFENSIN, ALPHA 6). [Source:SWI!                                                                  |
| ZNF9        | ENSG00000169714  | CELLULAR NUCLEIC ACID BINDING PROTEIN (CNBP). [Source                                                                   |
| RAC3        | ENSG00000169750  | RAS-RELATED C3 BOTULINUM TOXIN SUBSTRATE 3 (P21-RAC                                                                     |
| WNT10B      | ENSG00000169884  | WNT-10B PROTEIN PRECURSOR (WNT-12). [Source:SWISSPR                                                                     |
| NFRKB       | ENSG00000170322  | NUCLEAR FACTOR RELATED TO KAPPA B BINDING PROTEIN.                                                                      |
| CDK5R2      | ENSG00000171450  | CYCLIN-DEPENDENT KINASE 5 ACTIVATOR 2 PRECURSOR (C                                                                      |
| CYCS        | ENSG00000172115  | CYTOCHROME C. [Source:SWISSPROT;Acc:P00001]                                                                             |
| YES1        | ENSG00000176105  | PROTO-ONCOGENE TYROSINE-PROTEIN KINASE YES (EC 2.7                                                                      |
| DLEU1       | ENSG00000176124  | LEUKEMIA ASSOCIATED PROTEIN 1. [Source:SWISSPROT;Acc:                                                                   |
| BNIP3       | ENSG00000176643  | BCL2/ADENOVIRUS E1B 19-KDA PROTEIN-INTERACTING PRO                                                                      |
| RAD23A      | ENSG00000179262  | UV EXCISION REPAIR PROTEIN RAD23 HOMOLOG A (HHR23A<br>clone 121711 defective mariner transposon Hsmar2Cluster Incl. U\$ |
| UBE2G2      | ---              | ubiquitin conjugating enzyme G2 (UBE2G2)ubiquitin-conjugating e                                                         |
| KCNQ3       | ---              | KCNQ3 potassium channel; epilepsy-involved (FRAGMENT).potas                                                             |
| MTA1        | ---              | metastasis-associated MTA1metastasis associated 1Cluster Incl. U                                                        |
| LIG3        | ENSG000000005156 | DNA LIGASE III (EC 6.5.1.1) (POLYDEOXYRIBONUCLEOTIDE S'                                                                 |
| ITGA2B      | ENSG000000005961 | INTEGRIN ALPHA-IIB PRECURSOR (PLATELET MEMBRANE GL                                                                      |
| TOMM34      | ENSG000000025772 | MITOCHONDRIAL IMPORT RECEPTOR SUBUNIT TOM34 (TRAN                                                                       |
| ITIH4       | ENSG000000055955 | INTER-ALPHA-TRYPSIN INHIBITOR HEAVY CHAIN H4 PRECUR                                                                     |
| POLD1       | ENSG000000062822 | DNA POLYMERASE DELTA CATALYTIC SUBUNIT (EC 2.7.7.7) (C                                                                  |
| IKBKAP      | ENSG000000070061 | IKAPPAB KINASE COMPLEX-ASSOCIATED PROTEIN (IKK COM                                                                      |
| ASNS        | ENSG000000070669 | ASPARAGINE SYNTHETASE [GLUTAMINE-HYDROLYZING] (EC                                                                       |
| MX1         | ENSG000000075290 | WNT-8B PROTEIN PRECURSOR. [Source:SWISSPROT;Acc:Q93                                                                     |
| XRCC5       | ENSG000000079246 | ATP-DEPENDENT DNA HELICASE II, 80 KDA SUBUNIT (LUPUS                                                                    |
| XPO1        | ENSG000000082898 | EXPORTIN 1; CRM1, YEAST, HOMOLOG; EXPORTIN-1 (REQUIF                                                                    |
| RAD54L      | ENSG000000085999 | RAD54-LIKE PROTEIN; RAD54 HOMOLOG. [Source:RefSeq;Acc:                                                                  |
| PTHLH       | ENSG000000087494 | PARATHYROID HORMONE-RELATED PROTEIN PRECURSOR (                                                                         |
| MSH2        | ENSG000000095002 | DNA MISMATCH REPAIR PROTEIN MSH2. [Source:SWISSPROT                                                                     |
| CDKL1       | ENSG00000100490  | SERINE/THREONINE-PROTEIN KINASE KKIALRE (EC 2.7.1.-) ((                                                                 |
| ADA         | ENSG00000101093  | ADENOSINE DEAMINASE (EC 3.5.4.4) (ADENOSINE AMINOHYD                                                                    |
| n.a.        | ENSG00000103226  | PROTEIN PM5 PRECURSOR. [Source:SWISSPROT;Acc:Q15155                                                                     |
| TGFB1       | ENSG00000105329  | TRANSFORMING GROWTH FACTOR BETA 1 PRECURSOR (TG                                                                         |
| NPTX2       | ENSG00000106236  | NEURONAL PENTRAXIN II PRECURSOR (NP-II) (NP2). [Source:                                                                 |
| BAG1        | ENSG00000107262  | BAG-FAMILY MOLECULAR CHAPERONE REGULATOR-1 (BCL-2;                                                                      |
| BAG1        | ENSG00000107262  | BAG-FAMILY MOLECULAR CHAPERONE REGULATOR-1 (BCL-2;                                                                      |

**HGNC Symbol Ensembl ID**

SHB ENSG00000107338  
EIF3S10 ENSG00000107581  
HTATIP2 ENSG00000109854  
CALCA ENSG00000110680  
C6orf108 ENSG00000112667  
ACY1 ENSG00000114786  
PASK ENSG00000115687  
CEBPZ ENSG00000115816  
RAP1A ENSG00000116473  
NID ENSG00000116962  
IDE ENSG00000119912  
HOXB7 ENSG00000120087  
GUCY1B2 ENSG00000123201  
SERPINA7 ENSG00000123561  
FPRL2 ENSG00000123859  
MTRR ENSG00000124275  
THRA ENSG00000126351  
POR ENSG00000127948  
YWHAH ENSG00000128245  
TRIM28 ENSG00000130726  
DHX30 ENSG00000132153  
CDK8 ENSG00000132964  
CCNH ENSG00000134480  
RFK ENSG00000135002  
RABGGTB ENSG00000137955  
PLK4 ENSG00000142731  
CYP4B1 ENSG00000142973  
TP53BP2 ENSG00000143514  
NVL ENSG00000143748  
ARF1 ENSG00000143761  
PLK2 ENSG00000145632  
GZMA ENSG00000145649  
NOLA2 ENSG00000145912  
HMBS ENSG00000149397  
ITIH2 ENSG00000151655  
SACS ENSG00000151835  
GABPA ENSG00000154727  
ETS2 ENSG00000157557  
IL8RA ENSG00000163464  
API5 ENSG00000166181  
n.a. ENSG00000166557  
ICT1 ENSG00000167862  
DFFB ENSG00000169598  
USP7 ENSG00000171616  
PAP ENSG00000172016  
BSG ENSG00000172270  
YIF1 ENSG00000174851  
POLE ENSG00000177084

**Gene Description**

SHB (SRC HOMOLOG Y 2 DOMAIN CONTAINING) ADAPTOR PR  
EUKARYOTIC TRANSLATION INITIATION FACTOR 3 SUBUNIT  
HIV-1 TAT INTERACTIVE PROTEIN 2, 30KDA; TAT-INTERACTIN  
CALCITONIN PRECURSOR [CONTAINS: CALCITONIN; KATACAL  
PUTATIVE C-MYC-RESPONSIVE. [Source:RefSeq;Acc:NM\_0064  
AMINOACYLASE-1 (EC 3.5.1.14) (N-ACYL-L-AMINO-ACID AMID  
PAS DOMAIN CONTAINING SERINE/THREONINE KINASE; PAS-  
CCAAT-BOX-BINDING TRANSCRIPTION FACTOR (CCAAT-BIND  
RAS-RELATED PROTEIN RAP-1A (C21KG) (KREV-1 PROTEIN) (N  
NIDOGEN PRECURSOR (ENTACTIN). [Source:SWISSPROT;Acc:  
INSULIN-DEGRADING ENZYME (EC 3.4.24.56) (INSULYSIN) (IN  
HOMEODOMAIN PROTEIN HOX-B7 (HOX-2C) (HHO.C1). [Source:SV  
GUANYLATE CYCLASE SOLUBLE, BETA-2 CHAIN (EC 4.6.1.2) (T  
THYROXINE-BINDING GLOBULIN PRECURSOR (T4-BINDING G  
FMLP-RELATED RECEPTOR II (FMLP-R-II). [Source:SWISSPRO  
METHIONINE SYNTHASE REDUCTASE, MITOCHONDRIAL PRE  
THYROID HORMONE RECEPTOR ALPHA (C-ERBA-ALPHA) (C-I  
NADPH-CYTOCHROME P450 REDUCTASE (EC 1.6.2.4) (CPR) (I  
14-3-3 PROTEIN ETA (PROTEIN AS1). [Source:SWISSPROT;Acc:  
TRANSCRIPTION INTERMEDIARY FACTOR 1-BETA (TIF1-BETA  
DEAD/H (ASP-GLU-ALA-ASP/HIS) BOX POLYPEPTIDE 30 ISOFO  
CELL DIVISION PROTEIN KINASE 8 (EC 2.7.1.-) (PROTEIN KIN  
CYCLIN H (MO15-ASSOCIATED PROTEIN) (P37) (P34). [Source:  
riboflavin kinaseCluster Incl. AF038172:Homo sapiens clone 23923  
GERANYLGERANYL TRANSFERASE TYPE II BETA SUBUNIT (E  
SERINE/THREONINE KINASE 18; SNK AKIN KINASE. [Source:R  
CYTOCHROME P450 4B1 (EC 1.14.14.1) (CYP1B1) (P450-HP).  
TUMOR SUPPRESSOR P53-BINDING PROTEIN 2 (P53-BINDING  
NUCLEAR VCP-LIKE; NUCLEAR VALOSIN-CONTAINING PROTEIN  
ADP-RIBOSYLATION FACTOR 1. [Source:SWISSPROT;Acc:P328  
SERINE/THREONINE-PROTEIN KINASE SNK (EC 2.7.1.-) (SERU  
GRANZYME A PRECURSOR (EC 3.4.21.78) (CYTOTOXIC T-LYM  
NUCLEOLAR PROTEIN FAMILY A, MEMBER 2; LIKELY HOMOLOG  
PORPHOBILINOGEN DEAMINASE (EC 4.3.1.8) (HYDROXYMETHYL  
INTER-ALPHA-TRYPSIN INHIBITOR HEAVY CHAIN H2 PRECURSOR  
spastic ataxia of Charlevoix-Saguenay (sacsin)Cluster Incl. AB018;  
GA-binding protein alpha subunit (GABP-alpha); transcription facto  
C-ETS-2 PROTEIN.v-ets erythroblastosis virus E26 oncogene hom  
HIGH AFFINITY INTERLEUKIN-8 RECEPTOR A (IL-8R A) (IL-8 RE  
APOPTOSIS INHIBITOR 5; FIBROBLAST GROWTH FACTOR 2-II  
MEMBRANE PROTEIN P24B PRECURSOR. [Source:SWISSPRO  
IMMATURE COLON CARCINOMA TRANSCRIPT 1 (DIGESTION INHIBIT  
DNA FRAGMENTATION FACTOR 40 KDA SUBUNIT (EC 3.-.-.-) (E  
UBIQUITIN CARBOXYL-TERMINAL HYDROLASE 7 (EC 3.1.2.15) (E  
PANCREATITIS-ASSOCIATED PROTEIN 1 PRECURSOR. [Source:  
BASIGIN PRECURSOR (LEUKOCYTE ACTIVATION ANTIGEN MEMBRANE  
YIP1P-INTERACTING FACTOR; PUTATIVE RAB5-INTERACTING  
DNA POLYMERASE EPSILON, CATALYTIC SUBUNIT A (EC 2.7.7  
cDNA DKFZp586E1120Cluster Incl. AL049437:Homo sapiens mRNA

| <b>HGNC Symbol</b> | <b>regulation_48h</b> | <b>Ontology</b>    | <b>Group</b>   | <b>ratioDiff_8Tc vs 100Tc</b> |
|--------------------|-----------------------|--------------------|----------------|-------------------------------|
| MYC                | induced (448)         |                    | [Not included] | 2.3764                        |
| CACNA1G            | induced (448)         | Miscellaneous      | group01_(11)   | 4.84187                       |
| NME1               | induced (448)         | Cell cycle         | group01_(11)   | 2.30844                       |
| ADCY2              | induced (448)         | Signal Transductio | group01_(11)   | 3.61493                       |
| C4orf9             | induced (448)         | Miscellaneous      | group01_(11)   | 3.96701                       |
| FKBP5              | induced (448)         | Miscellaneous      | group01_(11)   | 2.24702                       |
| CRKL               | induced (448)         | Miscellaneous      | group01_(11)   | 2.46796                       |
| RFC5               | induced (448)         | Cell cycle         | group01_(11)   | 5.25137                       |
| PPP2CA             | induced (448)         | Signal Transductio | group01_(11)   | 2.70384                       |
| TIMM8A             | induced (448)         | Metabolism         | group01_(11)   | 4.01599                       |
| n.a.               | induced (448)         | Metabolism         | group01_(11)   | 2.25686                       |
| MAD2L1             | induced (448)         | Cell cycle         | group01_(11)   | 5.52907                       |
| MRPL12             | induced (448)         | Protein Synthesis  | group02_(25)   | 1.50055                       |
| NME1               | induced (448)         | Cell cycle         | group02_(25)   | 1.89026                       |
| METTL1             | induced (448)         | Protein Synthesis  | group02_(25)   | 1.35741                       |
| SLC7A5             | induced (448)         | Protein Synthesis  | group02_(25)   | 1.51645                       |
| SRM                | induced (448)         | Metabolism         | group02_(25)   | 1.57055                       |
| IL1B               | induced (448)         | Signal Transductio | group02_(25)   | 1.62763                       |
| PAICS              | induced (448)         | Cell cycle         | group02_(25)   | 1.59223                       |
| TOMM40             | induced (448)         | Metabolism         | group02_(25)   | 1.66341                       |
| PYCR1              | induced (448)         | Metabolism         | group02_(25)   | 1.86158                       |
| UMPK               | induced (448)         | Cell cycle         | group02_(25)   | 1.54319                       |
| LRP8               | induced (448)         | Metabolism         | group02_(25)   | 0.45412                       |
| DUSP14             | induced (448)         | Signal Transductio | group02_(25)   | 0.52046                       |
| METAP1             | induced (448)         | Metabolism         | group02_(25)   | 1.61905                       |
| ABCE1              | induced (448)         | Metabolism         | group02_(25)   | 1.86434                       |
| PA2G4              | induced (448)         | Cell cycle         | group02_(25)   | 1.44826                       |
| BOP1               | induced (448)         | Protein Synthesis  | group02_(25)   | 1.48379                       |
| RANBP1             | induced (448)         | Signal Transductio | group02_(25)   | 1.5814                        |
| CTPS               | induced (448)         | Cell cycle         | group02_(25)   | 1.89059                       |
| TRAP1              | induced (448)         | Apoptosis          | group02_(25)   | 1.70988                       |
| HSPD1              | induced (448)         | Metabolism         | group02_(25)   | 1.56801                       |
| PFAS               | induced (448)         | Cell cycle         | group02_(25)   | 1.45025                       |
| TEAD4              | induced (448)         | Transcription      | group02_(25)   | 1.48622                       |
| MIF                | induced (448)         | Signal Transductio | group02_(25)   | 1.5809                        |
| VAR2               | induced (448)         | Protein Synthesis  | group02_(25)   | 1.60541                       |
| CENTG1             | induced (448)         | Signal Transductio | group02_(25)   | 1.63124                       |
| DSCR2              | induced (448)         | Miscellaneous      | group03_(50)   | 1.34626                       |
| JAG2               | induced (448)         | Signal Transductio | group03_(50)   | 1.20535                       |
| PRKAR1B            | induced (448)         | Signal Transductio | group03_(50)   | 1.2126                        |
| n.a.               | induced (448)         | Signal Transductio | group03_(50)   | 0.99649                       |
| MATK               | induced (448)         | Signal Transductio | group03_(50)   | 0.36648                       |
| IARS               | induced (448)         | Protein Synthesis  | group03_(50)   | 1.2073                        |
| GAL                | induced (448)         | Signal Transductio | group03_(50)   | 1.92922                       |
| MCAM               | induced (448)         | Adhesion           | group03_(50)   | 1.73848                       |
| CAD                | induced (448)         | Cell cycle         | group03_(50)   | 1.28346                       |
| FH                 | induced (448)         | Metabolism         | group03_(50)   | 1.34544                       |
| SRPK1              | induced (448)         | Signal Transductio | group03_(50)   | 1.26191                       |
| NEFH               | induced (448)         | Miscellaneous      | group03_(50)   | 13.4611                       |
| NP                 | induced (448)         | Cell cycle         | group03_(50)   | 1.36814                       |
| AHCY               | induced (448)         | Metabolism         | group03_(50)   | 1.3206                        |
| POLD2              | induced (448)         | Cell cycle         | group03_(50)   | 1.13536                       |
| C1QBP              | induced (448)         | Immunity/Inflamm   | group03_(50)   | 1.42593                       |
| CAMKK2             | induced (448)         | Signal Transductio | group03_(50)   | 1.45735                       |
| n.a.               | induced (448)         | Miscellaneous      | group03_(50)   | 1.4522                        |
| BYSL               | induced (448)         | Adhesion           | group03_(50)   | 1.52071                       |
| NUP155             | induced (448)         | Metabolism         | group03_(50)   | 0.71143                       |

| <b>HGNC Symbol</b> | <b>regulation_48h</b> | <b>Ontology</b>    | <b>Group</b> | <b>ratioDiff_8Tc vs 100Tc</b> |
|--------------------|-----------------------|--------------------|--------------|-------------------------------|
| IFRD2              | induced (448)         | Metabolism         | group03_(50) | 1.37324                       |
| MRPL3              | induced (448)         | Protein Synthesis  | group03_(50) | 1.39505                       |
| HSPE1              | induced (448)         | Metabolism         | group03_(50) | 1.47264                       |
| HSPE1              | induced (448)         | Metabolism         | group03_(50) | 1.31557                       |
| n.a.               | induced (448)         | Miscellaneous      | group03_(50) | 1.06385                       |
| EBNA1BP2           | induced (448)         | Protein Synthesis  | group03_(50) | 1.38291                       |
| TNFRSF8            | induced (448)         | Signal Transductio | group03_(50) | 0.84576                       |
| PRDX4              | induced (448)         | Metabolism         | group03_(50) | 1.61226                       |
| CSE1L              | induced (448)         | Metabolism         | group03_(50) | 1.00579                       |
| RPP40              | induced (448)         | Protein Synthesis  | group03_(50) | 1.40911                       |
| n.a.               | induced (448)         | Miscellaneous      | group03_(50) | 4.22989                       |
| HRMT1L2            | induced (448)         | Signal Transductio | group03_(50) | 1.36716                       |
| n.a.               | induced (448)         | Miscellaneous      | group03_(50) | 1.16959                       |
| n.a.               | induced (448)         | Metabolism         | group03_(50) | 0.93658                       |
| MADH4              | induced (448)         | Signal Transductio | group03_(50) | 1.29848                       |
| IL9                | induced (448)         | Signal Transductio | group03_(50) | 1.44342                       |
| PDCD11             | induced (448)         | Miscellaneous      | group03_(50) | 1.41629                       |
| HK2                | induced (448)         | Metabolism         | group03_(50) | 0.12912                       |
| PWP2H              | induced (448)         | Signal Transductio | group03_(50) | 1.42152                       |
| n.a.               | induced (448)         | Signal Transductio | group03_(50) | 1.87657                       |
| NOLC1              | induced (448)         | Protein Synthesis  | group03_(50) | 1.42724                       |
| NOLC1              | induced (448)         | Protein Synthesis  | group03_(50) | 1.58858                       |
| CCT2               | induced (448)         | Metabolism         | group03_(50) | 1.17485                       |
| DTYMK              | induced (448)         | Cell cycle         | group03_(50) | 1.60379                       |
| HNRPAB             | induced (448)         | Metabolism         | group03_(50) | 1.42246                       |
| FASN               | induced (448)         | Metabolism         | group03_(50) | 1.42041                       |
| FASN               | induced (448)         | Metabolism         | group03_(50) | 1.64671                       |
| NMB                | induced (448)         | Signal Transductio | group03_(50) | 2.16172                       |
| CHC1               | induced (448)         | Cell cycle         | group03_(50) | 1.57608                       |
|                    | induced (448)         | Miscellaneous      | group03_(50) | 1.54568                       |
| KIAA0179           | induced (448)         | Metabolism         | group04_(39) | 0.93285                       |
| NTHL1              | induced (448)         | Cell cycle         | group04_(39) | 1.3775                        |
| UNG                | induced (448)         | Metabolism         | group04_(39) | 1.10324                       |
| KIAA0020           | induced (448)         | Miscellaneous      | group04_(39) | 1.22065                       |
| n.a.               | induced (448)         | Protein Synthesis  | group04_(39) | 1.40369                       |
| n.a.               | induced (448)         | Miscellaneous      | group04_(39) | 1.18203                       |
| POLE2              | induced (448)         | Cell cycle         | group04_(39) | 1.19014                       |
| MTHFD1             | induced (448)         | Metabolism         | group04_(39) | 1.51045                       |
| NOL5A              | induced (448)         | Protein Synthesis  | group04_(39) | 1.27464                       |
| PRPS2              | induced (448)         | Cell cycle         | group04_(39) | 1.1839                        |
| RUVBL2             | induced (448)         | Cell cycle         | group04_(39) | 1.26719                       |
| GPI                | induced (448)         | Metabolism         | group04_(39) | 1.24742                       |
| n.a.               | induced (448)         | Transcription      | group04_(39) | 1.43075                       |
| NPM3               | induced (448)         | Protein Synthesis  | group04_(39) | 1.50033                       |
| n.a.               | induced (448)         | Miscellaneous      | group04_(39) | 1.03437                       |
| CDC20              | induced (448)         | Cell cycle         | group04_(39) | 1.38226                       |
| n.a.               | induced (448)         | Miscellaneous      | group04_(39) | 1.19051                       |
| PRKDC              | induced (448)         | Signal Transductio | group04_(39) | 1.33767                       |
| CKS2               | induced (448)         | Cell cycle         | group04_(39) | 0.97911                       |
| CSE1L              | induced (448)         | Metabolism         | group04_(39) | 1.18278                       |
| EEF1E1             | induced (448)         | Protein Synthesis  | group04_(39) | 1.52508                       |
| HRMT1L2            | induced (448)         | Signal Transductio | group04_(39) | 1.10747                       |
| n.a.               | induced (448)         | Cell cycle         | group04_(39) | 1.78281                       |
| TST                | induced (448)         | Metabolism         | group04_(39) | 1.6905                        |
| DKC1               | induced (448)         | Protein Synthesis  | group04_(39) | 1.21105                       |
| RAN                | induced (448)         | Signal Transductio | group04_(39) | 1.38926                       |
| PDGFRA             | induced (448)         | Signal Transductio | group04_(39) | 1.32091                       |

| <b>HGNC Symbol</b> | <b>regulation_48h</b> | <b>Ontology</b>    | <b>Group</b> | <b>ratioDiff_8Tc vs 100Tc</b> |
|--------------------|-----------------------|--------------------|--------------|-------------------------------|
| CDK4               | induced (448)         | Cell cycle         | group04_(39) | 3.17761                       |
| ALDH1B1            | induced (448)         | Metabolism         | group04_(39) | 1.45133                       |
| SORD               | induced (448)         | Metabolism         | group04_(39) | 1.35875                       |
| BDH                | induced (448)         | Metabolism         | group04_(39) | 1.26823                       |
| GMPS               | induced (448)         | Cell cycle         | group04_(39) | 1.22531                       |
| GPR30              | induced (448)         | Signal Transductio | group04_(39) | 0.9772                        |
| PHB                | induced (448)         | Miscellaneous      | group04_(39) | 1.19489                       |
| STRA13             | induced (448)         | Miscellaneous      | group04_(39) | 1.75175                       |
| XPOT               | induced (448)         | Metabolism         | group04_(39) | 1.13386                       |
| SMN1               | induced (448)         | Metabolism         | group04_(39) | 1.29156                       |
| CHC1               | induced (448)         | Cell cycle         | group04_(39) | 1.16129                       |
| PLK1               | induced (448)         | Cell cycle         | group04_(39) | 1.08143                       |
| n.a.               | induced (448)         | Metabolism         | group05_(55) | 1.21388                       |
| AK2                | induced (448)         | Metabolism         | group05_(55) | 1.21653                       |
| n.a.               | induced (448)         | Cell cycle         | group05_(55) | 1.15509                       |
| MGST1              | induced (448)         | Metabolism         | group05_(55) | 1.26971                       |
| CSDA               | induced (448)         | Transcription      | group05_(55) | 1.1875                        |
| n.a.               | induced (448)         | Metabolism         | group05_(55) | 0.83981                       |
| ATP1B3             | induced (448)         | Metabolism         | group05_(55) | 1.17977                       |
| BCS1L              | induced (448)         | Miscellaneous      | group05_(55) | 1.15293                       |
| UNG                | induced (448)         | Cell cycle         | group05_(55) | 1.44215                       |
| PBP                | induced (448)         | Metabolism         | group05_(55) | 1.04448                       |
| CDC6               | induced (448)         | Cell cycle         | group05_(55) | 1.34424                       |
| CDC7               | induced (448)         | Cell cycle         | group05_(55) | 1.1793                        |
| MTAP               | induced (448)         | Cell cycle         | group05_(55) | 0.63939                       |
| ADSL               | induced (448)         | Cell cycle         | group05_(55) | 1.29939                       |
| CDKN3              | induced (448)         | Cell cycle         | group05_(55) | 1.36766                       |
| VRK1               | induced (448)         | Signal Transductio | group05_(55) | 1.05866                       |
| WFDC2              | induced (448)         | Miscellaneous      | group05_(55) | 0.95987                       |
| GSPT1              | induced (448)         | Miscellaneous      | group05_(55) | 1.2805                        |
| SLC39A14           | induced (448)         | Metabolism         | group05_(55) | 0.92228                       |
| n.a.               | induced (448)         | Signal Transductio | group05_(55) | 1.36447                       |
| RLN2               | induced (448)         | Signal Transductio | group05_(55) | 1.71085                       |
| BAG2               | induced (448)         | Apoptosis          | group05_(55) | 0.92007                       |
| HSD17B8            | induced (448)         | Metabolism         | group05_(55) | 0.83211                       |
| UCHL3              | induced (448)         | Metabolism         | group05_(55) | 0.98653                       |
| NME2               | induced (448)         | Cell cycle         | group05_(55) | 1.37431                       |
| MRPS12             | induced (448)         | Protein Synthesis  | group05_(55) | 1.27927                       |
| PCNA               | induced (448)         | Cell cycle         | group05_(55) | 1.26589                       |
| DPH2L2             | induced (448)         | Metabolism         | group05_(55) | 0.93668                       |
| CCNB1              | induced (448)         | Cell cycle         | group05_(55) | 1.07985                       |
| MC1R               | induced (448)         | Metabolism         | group05_(55) | 0.93349                       |
| SOD1               | induced (448)         | Metabolism         | group05_(55) | 1.33609                       |
| ATP5G3             | induced (448)         | Metabolism         | group05_(55) | 1.27248                       |
| CCT3               | induced (448)         | Metabolism         | group05_(55) | 1.19447                       |
| RFC4               | induced (448)         | Cell cycle         | group05_(55) | 1.30828                       |
| CDC25A             | induced (448)         | Cell cycle         | group05_(55) | 1.06288                       |
| FRDA               | induced (448)         | Metabolism         | group05_(55) | 1.04946                       |
| SNRPD1             | induced (448)         | Metabolism         | group05_(55) | 1.16123                       |
| CHAF1A             | induced (448)         | Cell cycle         | group05_(55) | 1.3222                        |
| PRDX2              | induced (448)         | Metabolism         | group05_(55) | 1.28746                       |
| BUB1               | induced (448)         | Cell cycle         | group05_(55) | 1.0375                        |
| CDC2               | induced (448)         | Cell cycle         | group05_(55) | 1.24944                       |
| POLR1C             | induced (448)         | Protein Synthesis  | group05_(55) | 1.3731                        |
| SLC19A1            | induced (448)         | Metabolism         | group05_(55) | 0.11568                       |
| TOMM20             | induced (448)         | Metabolism         | group05_(55) | 1.23424                       |
| MMP3               | induced (448)         | Signal Transductio | group05_(55) | 1.18776                       |

| <b>HGNC Symbol</b> | <b>regulation_48h</b> | <b>Ontology</b>    | <b>Group</b> | <b>ratioDiff_8Tc vs 100Tc</b> |
|--------------------|-----------------------|--------------------|--------------|-------------------------------|
| UBE2C              | induced (448)         | Miscellaneous      | group05_(55) | 1.2387                        |
| PTPN2              | induced (448)         | Signal Transductio | group05_(55) | 1.5487                        |
| RUVBL1             | induced (448)         | Transcription      | group05_(55) | 1.24152                       |
| TYMS               | induced (448)         | Cell cycle         | group05_(55) | 1.30425                       |
| DDX10              | induced (448)         | Protein Synthesis  | group05_(55) | 0.92391                       |
| TUFM               | induced (448)         | Protein Synthesis  | group05_(55) | 1.3219                        |
| AURKB              | induced (448)         | Cell cycle         | group05_(55) | 1.65691                       |
| RRS1               | induced (448)         | Protein Synthesis  | group05_(55) | 0.72559                       |
| GEMIN4             | induced (448)         | Metabolism         | group05_(55) | 1.25902                       |
| PTMA               | induced (448)         | Miscellaneous      | group05_(55) | 1.36491                       |
| CYP51A1            | induced (448)         | Metabolism         | group06_(67) | 1.04909                       |
| ARHGEF5            | induced (448)         | Signal Transductio | group06_(67) | 1.6733                        |
| KIAA0690           | induced (448)         | Miscellaneous      | group06_(67) | 0.95603                       |
| VDAC1              | induced (448)         | Metabolism         | group06_(67) | 1.00989                       |
| DDX1               | induced (448)         | Protein Synthesis  | group06_(67) | 1.25202                       |
| SCAMP1             | induced (448)         | Metabolism         | group06_(67) | 0.57469                       |
| DDX18              | induced (448)         | Protein Synthesis  | group06_(67) | 1.15068                       |
| PES1               | induced (448)         | Protein Synthesis  | group06_(67) | 1.14414                       |
| RANGAP1            | induced (448)         | Signal Transductio | group06_(67) | 1.01559                       |
| APEX1              | induced (448)         | Cell cycle         | group06_(67) | 1.33419                       |
| MYBL2              | induced (448)         | Transcription      | group06_(67) | 1.29557                       |
| USP10              | induced (448)         | Metabolism         | group06_(67) | 1.01975                       |
| n.a.               | induced (448)         | Miscellaneous      | group06_(67) | 0.76092                       |
| RPA3               | induced (448)         | Cell cycle         | group06_(67) | 1.41483                       |
| CXCL12             | induced (448)         | Signal Transductio | group06_(67) | 1.00046                       |
| n.a.               | induced (448)         | Miscellaneous      | group06_(67) | 0.97915                       |
| MCM3               | induced (448)         | Cell cycle         | group06_(67) | 1.79011                       |
| GMNN               | induced (448)         | Miscellaneous      | group06_(67) | 0.99417                       |
| HSPA9B             | induced (448)         | Metabolism         | group06_(67) | 1.04121                       |
| TCERG1             | induced (448)         | Transcription      | group06_(67) | 0.80809                       |
| RNU3IP2            | induced (448)         | Metabolism         | group06_(67) | 1.0667                        |
| SFRS7              | induced (448)         | Metabolism         | group06_(67) | 1.22445                       |
| MSH6               | induced (448)         | Cell cycle         | group06_(67) | 1.15211                       |
| CENPF              | induced (448)         | Cell cycle         | group06_(67) | 1.08356                       |
| MXI1               | induced (448)         | Transcription      | group06_(67) | 1.24438                       |
| AMD1               | induced (448)         | Metabolism         | group06_(67) | 0.97734                       |
| ELK1               | induced (448)         | Transcription      | group06_(67) | 0.99305                       |
| ILF3               | induced (448)         | Signal Transductio | group06_(67) | 1.23164                       |
| TFDP1              | induced (448)         | Transcription      | group06_(67) | 1.03834                       |
| n.a.               | induced (448)         | Protein Synthesis  | group06_(67) | 1.00754                       |
| TOP2A              | induced (448)         | Cell cycle         | group06_(67) | 1.12853                       |
| EIF5A              | induced (448)         | Protein Synthesis  | group06_(67) | 1.12484                       |
| n.a.               | induced (448)         | Miscellaneous      | group06_(67) | 1.02357                       |
| n.a.               | induced (448)         | Metabolism         | group06_(67) | 1.23476                       |
| ATIC               | induced (448)         | Cell cycle         | group06_(67) | 1.12373                       |
| ATIC               | induced (448)         | Cell cycle         | group06_(67) | 1.21664                       |
| PEX5               | induced (448)         | Metabolism         | group06_(67) | 1.07918                       |
| TAF4B              | induced (448)         | Transcription      | group06_(67) | 1.02797                       |
| HDGF               | induced (448)         | Signal Transductio | group06_(67) | 1.22358                       |
| HDGF               | induced (448)         | Signal Transductio | group06_(67) | 1.28071                       |
| ILF2               | induced (448)         | Signal Transductio | group06_(67) | 1.20744                       |
| CCNA2              | induced (448)         | Cell cycle         | group06_(67) | 1.19313                       |
| MDH2               | induced (448)         | Metabolism         | group06_(67) | 1.22058                       |
| PEG10              | induced (448)         | Miscellaneous      | group06_(67) | 1.44959                       |
| PPRC1              | induced (448)         | Signal Transductio | group06_(67) | 0.94437                       |
| SSRP1              | induced (448)         | Transcription      | group06_(67) | 1.24561                       |
| PTK9               | induced (448)         | Signal Transductio | group06_(67) | 1.34615                       |

| <b>HGNC Symbol</b> | <b>regulation_48h</b> | <b>Ontology</b>    | <b>Group</b> | <b>ratioDiff_8Tc vs 100Tc</b> |
|--------------------|-----------------------|--------------------|--------------|-------------------------------|
| ACSL1              | induced (448)         | Metabolism         | group06_(67) | 0.91687                       |
| PFKM               | induced (448)         | Metabolism         | group06_(67) | 1.28262                       |
| HNRPDL             | induced (448)         | Metabolism         | group06_(67) | 1.04157                       |
| RPIA               | induced (448)         | Metabolism         | group06_(67) | 0.94101                       |
| SLC16A1            | induced (448)         | Metabolism         | group06_(67) | 0.41351                       |
| KCNJ6              | induced (448)         | Metabolism         | group06_(67) | 1.2786                        |
| SFRS2              | induced (448)         | Metabolism         | group06_(67) | 1.02704                       |
| PRKCI              | induced (448)         | Signal Transductio | group06_(67) | 0.84682                       |
| POLR2H             | induced (448)         | Transcription      | group06_(67) | 1.32116                       |
| ABCE1              | induced (448)         | Metabolism         | group06_(67) | 0.6866                        |
| MELK               | induced (448)         | Signal Transductio | group06_(67) | 1.27441                       |
| DDX21              | induced (448)         | Protein Synthesis  | group06_(67) | 0.74002                       |
| SSSCA1             | induced (448)         | Miscellaneous      | group06_(67) | 1.12711                       |
| n.a.               | induced (448)         | Miscellaneous      | group06_(67) | 1.21357                       |
| HSPCA              | induced (448)         | Metabolism         | group06_(67) | 0.98101                       |
| DEAF1              | induced (448)         | Transcription      | group06_(67) | 1.06629                       |
| n.a.               | induced (448)         | Miscellaneous      | group06_(67) | 1.0083                        |
| EIF1AX             | induced (448)         | Protein Synthesis  | group06_(67) | 0.8281                        |
| n.a.               | induced (448)         | Miscellaneous      | group06_(67) | 1.21652                       |
| n.a.               | induced (448)         | Miscellaneous      | group06_(67) | 1.09651                       |
| SF3A3              | induced (448)         | Metabolism         | group07_(37) | 1.05147                       |
| n.a.               | induced (448)         | Miscellaneous      | group07_(37) | 1.42716                       |
| AK2                | induced (448)         | Cell cycle         | group07_(37) | 0.89803                       |
| PLAUR              | induced (448)         | Signal Transductio | group07_(37) | 1.02257                       |
| SCARB1             | induced (448)         | Adhesion           | group07_(37) | 0.77152                       |
| MCM2               | induced (448)         | Cell cycle         | group07_(37) | 1.24398                       |
| EXOSC7             | induced (448)         | Protein Synthesis  | group07_(37) | 1.21598                       |
| KHSRP              | induced (448)         | Metabolism         | group07_(37) | 1.03021                       |
| NUDC               | induced (448)         | Miscellaneous      | group07_(37) | 1.26719                       |
| CGRRF1             | induced (448)         | Cell cycle         | group07_(37) | 1.0118                        |
| APEX1              | induced (448)         | Cell cycle         | group07_(37) | 1.09852                       |
| GARS               | induced (448)         | Protein Synthesis  | group07_(37) | 1.19488                       |
| EIF3S9             | induced (448)         | Protein Synthesis  | group07_(37) | 1.21527                       |
| IMPDH1             | induced (448)         | Metabolism         | group07_(37) | 1.16639                       |
| VEGF               | induced (448)         | Signal Transductio | group07_(37) | 1.87363                       |
| TFDP2              | induced (448)         | Transcription      | group07_(37) | 1.10912                       |
| PRDX1              | induced (448)         | Metabolism         | group07_(37) | 1.05206                       |
| SCO2               | induced (448)         | Metabolism         | group07_(37) | 1.11537                       |
| TUBG1              | induced (448)         | Metabolism         | group07_(37) | 1.14335                       |
| MYCN               | induced (448)         | Transcription      | group07_(37) | 1.12384                       |
| ABL2               | induced (448)         | Signal Transductio | group07_(37) | 1.42956                       |
| SLC20A1            | induced (448)         | Metabolism         | group07_(37) | 1.1411                        |
| CDKN2B             | induced (448)         | Cell cycle         | group07_(37) | 1.64573                       |
| n.a.               | induced (448)         | Miscellaneous      | group07_(37) | 1.10775                       |
| FANCG              | induced (448)         | Cell cycle         | group07_(37) | 1.35147                       |
| PMPCA              | induced (448)         | Metabolism         | group07_(37) | 1.12328                       |
| PSMC3              | induced (448)         | Metabolism         | group07_(37) | 1.32879                       |
| MCM7               | induced (448)         | Cell cycle         | group07_(37) | 1.48747                       |
| ABCA3              | induced (448)         | Metabolism         | group07_(37) | 0.9891                        |
| EIF4EBP1           | induced (448)         | Protein Synthesis  | group07_(37) | 1.151                         |
| TNFRSF4            | induced (448)         | Signal Transductio | group07_(37) | 1.27171                       |
| SRP72              | induced (448)         | Metabolism         | group07_(37) | 1.00404                       |
| ALG3               | induced (448)         | Metabolism         | group07_(37) | 0.90013                       |
| CKS1B              | induced (448)         | Cell cycle         | group07_(37) | 1.08272                       |
| NSEP1              | induced (448)         | Transcription      | group07_(37) | 1.00877                       |
| FARSLA             | induced (448)         | Protein Synthesis  | group07_(37) | 1.12775                       |
| PRIM1              | induced (448)         | Cell cycle         | group07_(37) | 1.01017                       |

| HGNC Symbol | regulation_48h | Ontology           | Group        | ratioDiff_8Tc vs 100Tc |
|-------------|----------------|--------------------|--------------|------------------------|
| TBL3        | induced (448)  | Signal Transductio | group08_(44) | 1.03572                |
| JUND        | induced (448)  | Transcription      | group08_(44) | 1.29562                |
| PTBP1       | induced (448)  | Metabolism         | group08_(44) | 1.1253                 |
| MRE11A      | induced (448)  | Cell cycle         | group08_(44) | 1.12138                |
| HSPA5       | induced (448)  | Metabolism         | group08_(44) | 1.12893                |
| OAT         | induced (448)  | Metabolism         | group08_(44) | 1.0997                 |
| TFRC        | induced (448)  | Metabolism         | group08_(44) | 1.04406                |
| SHMT1       | induced (448)  | Metabolism         | group08_(44) | 1.01202                |
| CLNS1A      | induced (448)  | Metabolism         | group08_(44) | 1.17999                |
| SEMA3C      | induced (448)  | Immunity/Inflamm   | group08_(44) | 1.4029                 |
| MCAM        | induced (448)  | Adhesion           | group08_(44) | 0.98349                |
| MAPKAPK5    | induced (448)  | Signal Transductio | group08_(44) | 1.18476                |
| SIP1        | induced (448)  | Metabolism         | group08_(44) | 1.06483                |
| NF2         | induced (448)  | Metabolism         | group08_(44) | 1.15812                |
| SLC1A5      | induced (448)  | Metabolism         | group08_(44) | 1.47504                |
| PSMA2       | induced (448)  | Metabolism         | group08_(44) | 1.18952                |
| RAD51C      | induced (448)  | Cell cycle         | group08_(44) | 1.07359                |
| CTSC        | induced (448)  | Apoptosis          | group08_(44) | 0.95852                |
| HSPA8       | induced (448)  | Metabolism         | group08_(44) | 1.08507                |
| n.a.        | induced (448)  | Miscellaneous      | group08_(44) | 0.511                  |
| IGFBP2      | induced (448)  | Signal Transductio | group08_(44) | 1.05091                |
| DARS        | induced (448)  | Protein Synthesis  | group08_(44) | 1.08118                |
| UCHL3       | induced (448)  | Metabolism         | group08_(44) | 1.02202                |
| GTF3A       | induced (448)  | Transcription      | group08_(44) | 0.97068                |
| RPL5        | induced (448)  | Protein Synthesis  | group08_(44) | 1.12898                |
| AMD1        | induced (448)  | Metabolism         | group08_(44) | 0.73975                |
| HSPA1A      | induced (448)  | Metabolism         | group08_(44) | 2.23581                |
| SYNGR3      | induced (448)  | Miscellaneous      | group08_(44) | 0.89946                |
| NINJ1       | induced (448)  | Adhesion           | group08_(44) | 0.24112                |
| SNRPA1      | induced (448)  | Metabolism         | group08_(44) | 1.1024                 |
| TAF9        | induced (448)  | Transcription      | group08_(44) | 1.12279                |
| SYNCRIP     | induced (448)  | Metabolism         | group08_(44) | 1.32004                |
| n.a.        | induced (448)  | Cell cycle         | group08_(44) | 1.22827                |
| ITGB3BP     | induced (448)  | Adhesion           | group08_(44) | 1.11119                |
| PTPRF       | induced (448)  | Signal Transductio | group08_(44) | 1.07111                |
| CHEK1       | induced (448)  | Cell cycle         | group08_(44) | 1.01791                |
| TCEB1       | induced (448)  | Transcription      | group08_(44) | 1.05153                |
| n.a.        | induced (448)  | Miscellaneous      | group08_(44) | 0.90476                |
| VBP1        | induced (448)  | Metabolism         | group08_(44) | 0.914                  |
| BUB1B       | induced (448)  | Cell cycle         | group08_(44) | 1.15887                |
| RACGAP1     | induced (448)  | Signal Transductio | group08_(44) | 0.88986                |
| AK3         | induced (448)  | Cell cycle         | group08_(44) | 1.69248                |
| HNRPF       | induced (448)  | Metabolism         | group08_(44) | 1.23193                |
| PDAP1       | induced (448)  | Signal Transductio | group08_(44) | 1.03511                |
| SELE        | induced (448)  | Adhesion           | group09_(47) | 1.27826                |
| n.a.        | induced (448)  | Miscellaneous      | group09_(47) | 1.14839                |
| RCN1        | induced (448)  | Metabolism         | group09_(47) | 0.23216                |
| GLDC        | induced (448)  | Metabolism         | group09_(47) | 0.53743                |
| PMS1        | induced (448)  | Cell cycle         | group09_(47) | 1.07045                |
| PFKP        | induced (448)  | Metabolism         | group09_(47) | 0.90664                |
| PDCD2       | induced (448)  | Apoptosis          | group09_(47) | 1.04283                |
| MGST2       | induced (448)  | Metabolism         | group09_(47) | 1.28168                |
| NDUFB7      | induced (448)  | Metabolism         | group09_(47) | 1.16558                |
| G22P1       | induced (448)  | Cell cycle         | group09_(47) | 1.21622                |
| n.a.        | induced (448)  | Miscellaneous      | group09_(47) | 1.32008                |
| PBEF1       | induced (448)  | Signal Transductio | group09_(47) | 0.68784                |
| TBL2        | induced (448)  | Miscellaneous      | group09_(47) | 0.98072                |



| <b>HGNC Symbol</b> | <b>regulation_48h</b> | <b>Ontology</b>    | <b>Group</b> | <b>ratioDiff_8Tc vs 100Tc</b> |
|--------------------|-----------------------|--------------------|--------------|-------------------------------|
| GCN5L2             | induced (448)         | Protein Synthesis  | group09_(47) | 0.81582                       |
| CDK2AP1            | induced (448)         | Cell cycle         | group09_(47) | 1.21604                       |
| NOL1               | induced (448)         | Protein Synthesis  | group09_(47) | 1.17826                       |
| SLC29A1            | induced (448)         | Metabolism         | group09_(47) | 1.03641                       |
| BNIP1              | induced (448)         | Apoptosis          | group09_(47) | 1.51801                       |
| DBN1               | induced (448)         | Metabolism         | group09_(47) | 0.97252                       |
| EIF4G1             | induced (448)         | Protein Synthesis  | group09_(47) | 1.11453                       |
| B4GALT2            | induced (448)         | Metabolism         | group09_(47) | 0.55927                       |
| TMEM5              | induced (448)         | Signal Transductio | group09_(47) | 0.85335                       |
| FVT1               | induced (448)         | Miscellaneous      | group09_(47) | 0.2208                        |
| ETF1               | induced (448)         | Protein Synthesis  | group09_(47) | 0.96041                       |
| ATF4               | induced (448)         | Transcription      | group09_(47) | 1.05744                       |
| ILF3               | induced (448)         | Transcription      | group09_(47) | 1.16996                       |
| RAMP1              | induced (448)         | Metabolism         | group09_(47) | 1.42907                       |
| n.a.               | induced (448)         | Signal Transductio | group09_(47) | 1.08658                       |
| ADCY3              | induced (448)         | Signal Transductio | group09_(47) | 0.61993                       |
| AFG3L2             | induced (448)         | Metabolism         | group09_(47) | 1.12675                       |
| PRPS1              | induced (448)         | Cell cycle         | group09_(47) | 1.13059                       |
| OPRS1              | induced (448)         | Metabolism         | group09_(47) | 0.37851                       |
| TOMM70A            | induced (448)         | Metabolism         | group09_(47) | 1.21096                       |
| APRT               | induced (448)         | Cell cycle         | group09_(47) | 1.29353                       |
| FGFR4              | induced (448)         | Signal Transductio | group09_(47) | 0.69969                       |
| DEFA6              | induced (448)         | Miscellaneous      | group09_(47) | 1.18016                       |
| ZNF9               | induced (448)         | Transcription      | group09_(47) | 1.6475                        |
| RAC3               | induced (448)         | Signal Transductio | group09_(47) | 0.12015                       |
| WNT10B             | induced (448)         | Signal Transductio | group09_(47) | 3.05265                       |
| NFRKB              | induced (448)         | Transcription      | group09_(47) | 1.30406                       |
| CDK5R2             | induced (448)         | Cell cycle         | group09_(47) | 1.17064                       |
| CYCS               | induced (448)         | Metabolism         | group09_(47) | 0.13868                       |
| YES1               | induced (448)         | Signal Transductio | group09_(47) | 1.00449                       |
| DLEU1              | induced (448)         | Miscellaneous      | group09_(47) | 1.07807                       |
| BNIP3              | induced (448)         | Apoptosis          | group09_(47) | 0.95028                       |
| RAD23A             | induced (448)         | Cell cycle         | group09_(47) | 1.12355                       |
|                    | induced (448)         | Miscellaneous      | group09_(47) | 0.41569                       |
| UBE2G2             | induced (448)         | Metabolism         | group10_(72) | 1.25227                       |
| KCNQ3              | induced (448)         | Metabolism         | group10_(72) | 0.8407                        |
| MTA1               | induced (448)         | Transcription      | group10_(72) | 1.11265                       |
| LIG3               | induced (448)         | Cell cycle         | group10_(72) | 1.30475                       |
| ITGA2B             | induced (448)         | Signal Transductio | group10_(72) | 1.37088                       |
| TOMM34             | induced (448)         | Metabolism         | group10_(72) | 1.16749                       |
| ITIH4              | induced (448)         | Miscellaneous      | group10_(72) | 1.03377                       |
| POLD1              | induced (448)         | Cell cycle         | group10_(72) | 1.21528                       |
| IKBKAP             | induced (448)         | Signal Transductio | group10_(72) | 1.08096                       |
| ASNS               | induced (448)         | Protein Synthesis  | group10_(72) | 0.78433                       |
| MX1                | induced (448)         | Signal Transductio | group10_(72) | 1.21969                       |
| XRCC5              | induced (448)         | Cell cycle         | group10_(72) | 1.63313                       |
| XPO1               | induced (448)         | Metabolism         | group10_(72) | 1.0894                        |
| RAD54L             | induced (448)         | Cell cycle         | group10_(72) | 1.30816                       |
| PTHLH              | induced (448)         | Signal Transductio | group10_(72) | 0.58548                       |
| MSH2               | induced (448)         | Cell cycle         | group10_(72) | 1.17264                       |
| CDKL1              | induced (448)         | Cell cycle         | group10_(72) | 0.9063                        |
| ADA                | induced (448)         | Metabolism         | group10_(72) | 1.08888                       |
| n.a.               | induced (448)         | Miscellaneous      | group10_(72) | 1.08238                       |
| TGFB1              | induced (448)         | Signal Transductio | group10_(72) | 0.72051                       |
| NPTX2              | induced (448)         | Adhesion           | group10_(72) | 0.41935                       |
| BAG1               | induced (448)         | Apoptosis          | group10_(72) | 1.2899                        |
| BAG1               | induced (448)         | Apoptosis          | group10_(72) | 1.15374                       |

| <b>HGNC Symbol</b> | <b>regulation_48h</b> | <b>Ontology</b>    | <b>Group</b> | <b>ratioDiff_8Tc vs 100Tc</b> |
|--------------------|-----------------------|--------------------|--------------|-------------------------------|
| SHB                | induced (448)         | Signal Transductio | group10_(72) | 0.86843                       |
| EIF3S10            | induced (448)         | Protein Synthesis  | group10_(72) | 0.92623                       |
| HTATIP2            | induced (448)         | Transcription      | group10_(72) | 1.45903                       |
| CALCA              | induced (448)         | Signal Transductio | group10_(72) | 1.13444                       |
| C6orf108           | induced (448)         | Miscellaneous      | group10_(72) | 1.19198                       |
| ACY1               | induced (448)         | Metabolism         | group10_(72) | 1.49339                       |
| PASK               | induced (448)         | Signal Transductio | group10_(72) | 0.78773                       |
| CEBPZ              | induced (448)         | Transcription      | group10_(72) | 0.9466                        |
| RAP1A              | induced (448)         | Signal Transductio | group10_(72) | 0.76155                       |
| NID                | induced (448)         | Adhesion           | group10_(72) | 1.25385                       |
| IDE                | induced (448)         | Signal Transductio | group10_(72) | 1.05635                       |
| HOXB7              | induced (448)         | Transcription      | group10_(72) | 1.26641                       |
| GUCY1B2            | induced (448)         | Signal Transductio | group10_(72) | 1.2161                        |
| SERPINA7           | induced (448)         | Miscellaneous      | group10_(72) | 0.87814                       |
| FPRL2              | induced (448)         | Signal Transductio | group10_(72) | 1.14439                       |
| MTRR               | induced (448)         | Metabolism         | group10_(72) | 0.87687                       |
| THRA               | induced (448)         | Signal Transductio | group10_(72) | 0.99733                       |
| POR                | induced (448)         | Metabolism         | group10_(72) | 1.141                         |
| YWHAH              | induced (448)         | Signal Transductio | group10_(72) | 1.02239                       |
| TRIM28             | induced (448)         | Transcription      | group10_(72) | 1.3573                        |
| DHX30              | induced (448)         | Miscellaneous      | group10_(72) | 1.06363                       |
| CDK8               | induced (448)         | Transcription      | group10_(72) | 0.56615                       |
| CCNH               | induced (448)         | Transcription      | group10_(72) | 1.06268                       |
| RFK                | induced (448)         | Metabolism         | group10_(72) | 1.23926                       |
| RABGGTB            | induced (448)         | Metabolism         | group10_(72) | 1.16822                       |
| PLK4               | induced (448)         | Signal Transductio | group10_(72) | 1.14971                       |
| CYP4B1             | induced (448)         | Metabolism         | group10_(72) | 1.21661                       |
| TP53BP2            | induced (448)         | Signal Transductio | group10_(72) | 2.73204                       |
| NVL                | induced (448)         | Miscellaneous      | group10_(72) | 0.92542                       |
| ARF1               | induced (448)         | Signal Transductio | group10_(72) | 1.08929                       |
| PLK2               | induced (448)         | Signal Transductio | group10_(72) | 0.91806                       |
| GZMA               | induced (448)         | Immunity/Inflamm   | group10_(72) | 1.76904                       |
| NOLA2              | induced (448)         | Protein Synthesis  | group10_(72) | 3.37019                       |
| HMBS               | induced (448)         | Metabolism         | group10_(72) | 1.21367                       |
| ITIH2              | induced (448)         | Miscellaneous      | group10_(72) | 0.8581                        |
| SACS               | induced (448)         | Metabolism         | group10_(72) | 0.29733                       |
| GABPA              | induced (448)         | Transcription      | group10_(72) | 1.17483                       |
| ETS2               | induced (448)         | Transcription      | group10_(72) | 0.68972                       |
| IL8RA              | induced (448)         | Signal Transductio | group10_(72) | 1.03057                       |
| API5               | induced (448)         | Apoptosis          | group10_(72) | 0.993                         |
| n.a.               | induced (448)         | Metabolism         | group10_(72) | 1.04228                       |
| ICT1               | induced (448)         | Protein Synthesis  | group10_(72) | 0.9037                        |
| DFFB               | induced (448)         | Apoptosis          | group10_(72) | 0.9399                        |
| USP7               | induced (448)         | Metabolism         | group10_(72) | 1.01493                       |
| PAP                | induced (448)         | Immunity/Inflamm   | group10_(72) | 1.02525                       |
| BSG                | induced (448)         | Signal Transductio | group10_(72) | 0.86176                       |
| YIF1               | induced (448)         | Signal Transductio | group10_(72) | 1.24813                       |
| POLE               | induced (448)         | Cell cycle         | group10_(72) | 1.09589                       |
|                    | induced (448)         | Miscellaneous      | group10_(72) | 0.35856                       |

| <b>HGNC Symbol</b> | <b>ratioDiff_6Tc vs 100Tc</b> | <b>ratioDiff_5Tc vs 100Tc</b> | <b>ratioDiff_4Tc vs 100Tc</b> |
|--------------------|-------------------------------|-------------------------------|-------------------------------|
| MYC                | 4.81549                       | 6.66592                       | 9.56934                       |
| CACNA1G            | 6.71896                       | 9.27174                       | 4.78749                       |
| NME1               | 3.75328                       | 4.66457                       | 5.73212                       |
| ADCY2              | 2.94268                       | 8.1558                        | 2.17108                       |
| C4orf9             | 2.11863                       | 2.07955                       | 2.42135                       |
| FKBP5              | 4.19037                       | 3.37186                       | 4.83496                       |
| CRKL               | 2.25103                       | 2.99466                       | 4.1095                        |
| RFC5               | 3.76623                       | 7.70054                       | 9.4519                        |
| PPP2CA             | 2.54673                       | 3.85817                       | 4.42124                       |
| TIMM8A             | 4.70979                       | 4.93726                       | 15.42908                      |
| n.a.               | 4.48987                       | 3.55254                       | 5.82794                       |
| MAD2L1             | 15.54284                      | 13.6743                       | 14.60326                      |
| MRPL12             | 2.07637                       | 2.22999                       | 2.65853                       |
| NME1               | 3.26224                       | 3.69856                       | 4.88817                       |
| METTL1             | 2.19881                       | 3.19541                       | 3.88134                       |
| SLC7A5             | 2.69691                       | 2.43193                       | 3.66158                       |
| SRM                | 2.59134                       | 3.29691                       | 3.56176                       |
| IL1B               | 2.07153                       | 2.10507                       | 2.3458                        |
| PAICS              | 2.73837                       | 3.37929                       | 3.91134                       |
| TOMM40             | 2.04021                       | 2.73932                       | 2.72483                       |
| PYCR1              | 2.62304                       | 3.25362                       | 3.87065                       |
| UMPK               | 2.08307                       | 2.52457                       | 2.74736                       |
| LRP8               | 2.24522                       | 4.38339                       | 2.30539                       |
| DUSP14             | 2.60904                       | 5.48787                       | 2.65001                       |
| METAP1             | 2.80028                       | 2.59915                       | 3.22885                       |
| ABCE1              | 2.40818                       | 2.80154                       | 2.43602                       |
| PA2G4              | 2.19245                       | 2.75535                       | 3.12647                       |
| BOP1               | 2.12655                       | 2.40387                       | 2.53434                       |
| RANBP1             | 2.0889                        | 2.69317                       | 2.79258                       |
| CTPS               | 2.17632                       | 2.96327                       | 3.04084                       |
| TRAP1              | 2.76006                       | 2.89325                       | 3.4475                        |
| HSPD1              | 2.38861                       | 3.10118                       | 3.88176                       |
| PFAS               | 2.30469                       | 2.85753                       | 3.12945                       |
| TEAD4              | 2.11858                       | 2.54551                       | 2.64704                       |
| MIF                | 2.15543                       | 2.01053                       | 2.4144                        |
| VAR2               | 2.07228                       | 2.2788                        | 2.42498                       |
| CENTG1             | 2.05212                       | 2.5154                        | 2.9446                        |
| DSCR2              | 1.9494                        | 2.34422                       | 2.83542                       |
| JAG2               | 1.89737                       | 2.4156                        | 2.60547                       |
| PRKAR1B            | 1.82421                       | 3.0025                        | 2.15551                       |
| n.a.               | 1.72121                       | 2.11201                       | 2.49754                       |
| MATK               | 1.70159                       | 2.37402                       | 2.45864                       |
| IARS               | 1.47277                       | 2.09977                       | 2.03272                       |
| GAL                | 1.95403                       | 2.37595                       | 3.6872                        |
| MCAM               | 1.55853                       | 2.36932                       | 2.17634                       |
| CAD                | 1.82868                       | 2.39415                       | 2.6133                        |
| FH                 | 1.49852                       | 2.13702                       | 2.32288                       |
| SRPK1              | 1.78077                       | 2.37834                       | 2.58474                       |
| NEFH               | 1.79537                       | 83.04585                      | 22.94621                      |
| NP                 | 1.712                         | 2.06789                       | 2.12232                       |
| AHCY               | 1.76625                       | 2.13765                       | 2.65962                       |
| POLD2              | 1.62243                       | 2.27814                       | 2.62605                       |
| C1QBP              | 1.97132                       | 2.35206                       | 2.63978                       |
| CAMKK2             | 1.8368                        | 2.47737                       | 2.97843                       |
| n.a.               | 1.65886                       | 3.06294                       | 2.96822                       |
| BYSL               | 1.9524                        | 2.1623                        | 2.25914                       |
| NUP155             | 0.79647                       | 2.39668                       | 2.38242                       |

| <b>HGNC Symbol</b> | <b>ratioDiff_6Tc vs 100Tc</b> | <b>ratioDiff_5Tc vs 100Tc</b> | <b>ratioDiff_4Tc vs 100Tc</b> |
|--------------------|-------------------------------|-------------------------------|-------------------------------|
| IFRD2              | 1.91314                       | 2.31554                       | 3.36477                       |
| MRPL3              | 1.47536                       | 2.58579                       | 2.71718                       |
| HSPE1              | 1.95572                       | 2.46401                       | 2.81177                       |
| HSPE1              | 1.83745                       | 2.45599                       | 2.90171                       |
| n.a.               | 1.12173                       | 2.0534                        | 2.10568                       |
| EBNA1BP2           | 1.78181                       | 2.31217                       | 2.55573                       |
| TNFRSF8            | 1.90649                       | 2.10192                       | 3.23506                       |
| PRDX4              | 1.92888                       | 2.22135                       | 2.56848                       |
| CSE1L              | 1.56971                       | 2.21557                       | 2.54962                       |
| RPP40              | 0.47104                       | 3.15682                       | 2.93052                       |
| n.a.               | 0.18787                       | 4.97927                       | 5.36059                       |
| HRMT1L2            | 1.83353                       | 2.1637                        | 2.26084                       |
| n.a.               | 1.77896                       | 2.44741                       | 2.14863                       |
| n.a.               | 1.61808                       | 2.10926                       | 2.2726                        |
| MADH4              | 1.72555                       | 2.16611                       | 2.61201                       |
| IL9                | 1.99284                       | 2.05263                       | 2.14009                       |
| PDCD11             | 1.5329                        | 2.07363                       | 2.10016                       |
| HK2                | 1.48275                       | 3.45872                       | 2.9279                        |
| PWP2H              | 1.56456                       | 2.02778                       | 2.06541                       |
| n.a.               | 1.40521                       | 4.18783                       | 3.5851                        |
| NOLC1              | 1.84493                       | 2.20351                       | 2.83921                       |
| NOLC1              | 1.90047                       | 2.27739                       | 2.26511                       |
| CCT2               | 1.51384                       | 2.02355                       | 2.2315                        |
| DTYMK              | 1.90031                       | 2.06492                       | 2.15035                       |
| HNRPAB             | 1.7638                        | 2.1771                        | 2.37648                       |
| FASN               | 1.69942                       | 2.82226                       | 3.38783                       |
| FASN               | 1.8119                        | 2.02061                       | 2.61375                       |
| NMB                | 1.63689                       | 2.68896                       | 2.36896                       |
| CHC1               | 1.72504                       | 2.19078                       | 2.80687                       |
|                    | 1.24192                       | 3.02726                       | 3.20113                       |
| KIAA0179           | 1.10468                       | 1.7302                        | 2.29587                       |
| NTHL1              | 1.73718                       | 1.81578                       | 2.44866                       |
| UNG                | 1.62943                       | 1.93033                       | 2.1892                        |
| KIAA0020           | 1.51149                       | 1.95995                       | 2.05543                       |
| n.a.               | 1.76138                       | 1.92484                       | 2.09881                       |
| n.a.               | 1.77363                       | 1.90119                       | 2.27456                       |
| POLE2              | 1.64511                       | 1.64511                       | 2.25067                       |
| MTHFD1             | 1.52793                       | 1.84837                       | 2.16734                       |
| NOL5A              | 1.56604                       | 1.98401                       | 2.14148                       |
| PRPS2              | 1.47776                       | 1.87085                       | 2.04232                       |
| RUVBL2             | 1.71392                       | 1.87034                       | 2.13365                       |
| GPI                | 1.63725                       | 1.80246                       | 2.10822                       |
| n.a.               | 1.8862                        | 1.945                         | 2.18251                       |
| NPM3               | 2.44565                       | 1.94807                       | 2.34684                       |
| n.a.               | 1.74896                       | 1.93653                       | 2.33734                       |
| CDC20              | 2.01262                       | 1.95725                       | 2.45444                       |
| n.a.               | 1.35448                       | 1.80728                       | 2.19751                       |
| PRKDC              | 1.71524                       | 1.9643                        | 2.38681                       |
| CKS2               | 1.51532                       | 1.64931                       | 2.00999                       |
| CSE1L              | 1.65046                       | 1.80897                       | 2.37117                       |
| EEF1E1             | 2.02514                       | 1.88755                       | 2.42838                       |
| HRMT1L2            | 1.51373                       | 1.79676                       | 2.09275                       |
| n.a.               | 1.92799                       | 1.59738                       | 2.44071                       |
| TST                | 2.14819                       | 1.67757                       | 2.06398                       |
| DKC1               | 1.68122                       | 1.89721                       | 2.06805                       |
| RAN                | 1.70135                       | 1.76479                       | 2.24487                       |
| PDGFRA             | 1.45678                       | 1.63785                       | 2.14063                       |

| <b>HGNC Symbol</b> | <b>ratioDiff_6Tc vs 100Tc</b> | <b>ratioDiff_5Tc vs 100Tc</b> | <b>ratioDiff_4Tc vs 100Tc</b> |
|--------------------|-------------------------------|-------------------------------|-------------------------------|
| CDK4               | 5.36344                       | 0.32002                       | 5.43797                       |
| ALDH1B1            | 1.91156                       | 1.73122                       | 2.31769                       |
| SORD               | 2.05131                       | 1.84885                       | 2.47132                       |
| BDH                | 1.13868                       | 1.83818                       | 2.2574                        |
| GMPS               | 1.73284                       | 1.92543                       | 2.16261                       |
| GPR30              | 1.58977                       | 1.51319                       | 2.01867                       |
| PHB                | 1.92382                       | 1.96119                       | 2.10028                       |
| STRA13             | 1.77909                       | 1.94096                       | 2.29173                       |
| XPOT               | 1.83347                       | 1.64499                       | 2.44741                       |
| SMN1               | 1.35767                       | 1.41486                       | 2.08633                       |
| CHC1               | 1.68933                       | 1.79879                       | 2.18224                       |
| PLK1               | 1.49987                       | 1.72055                       | 2.08511                       |
| n.a.               | 1.97105                       | 2.03541                       | 1.84092                       |
| AK2                | 1.51634                       | 1.64201                       | 1.73135                       |
| n.a.               | 1.48892                       | 1.58587                       | 1.93437                       |
| MGST1              | 1.39779                       | 1.62596                       | 1.91053                       |
| CSDA               | 1.49072                       | 1.58357                       | 1.78478                       |
| n.a.               | 1.21551                       | 1.4205                        | 1.57653                       |
| ATP1B3             | 1.4471                        | 1.80614                       | 1.85421                       |
| BCS1L              | 1.53397                       | 1.55436                       | 1.78733                       |
| UNG                | 1.4841                        | 1.68728                       | 1.91587                       |
| PBP                | 1.73045                       | 1.76598                       | 1.92542                       |
| CDC6               | 1.74289                       | 1.54987                       | 1.76963                       |
| CDC7               | 1.66452                       | 2.02226                       | 1.83287                       |
| MTAP               | 1.31137                       | 2.18955                       | 1.95793                       |
| ADSL               | 1.40683                       | 1.73825                       | 1.71136                       |
| CDKN3              | 1.63709                       | 1.8574                        | 1.97721                       |
| VRK1               | 1.26603                       | 1.64609                       | 1.73945                       |
| WFDC2              | 1.26226                       | 1.53946                       | 1.61014                       |
| GSPT1              | 1.42812                       | 1.56346                       | 1.80976                       |
| SLC39A14           | 1.43645                       | 1.78144                       | 1.86249                       |
| n.a.               | 1.74825                       | 1.664                         | 1.83822                       |
| RLN2               | 1.52571                       | 1.63963                       | 1.56957                       |
| BAG2               | 1.3436                        | 1.39729                       | 1.62894                       |
| HSD17B8            | 1.87999                       | 1.68966                       | 1.74418                       |
| UCHL3              | 1.2763                        | 1.66739                       | 1.70436                       |
| NME2               | 1.67396                       | 1.75913                       | 1.92993                       |
| MRPS12             | 1.61773                       | 1.60752                       | 1.9294                        |
| PCNA               | 1.53414                       | 1.75076                       | 1.80126                       |
| DPH2L2             | 1.44138                       | 1.33836                       | 1.89954                       |
| CCNB1              | 1.44683                       | 1.61157                       | 1.90329                       |
| MC1R               | 1.43667                       | 1.97308                       | 1.98634                       |
| SOD1               | 1.43178                       | 1.73899                       | 1.81352                       |
| ATP5G3             | 1.29221                       | 1.69593                       | 1.85203                       |
| CCT3               | 1.61989                       | 1.99064                       | 1.97193                       |
| RFC4               | 1.37322                       | 1.77171                       | 1.88905                       |
| CDC25A             | 2.17229                       | 1.62117                       | 1.56237                       |
| FRDA               | 1.55664                       | 1.65995                       | 1.93501                       |
| SNRPD1             | 1.64985                       | 2.13432                       | 1.99208                       |
| CHAF1A             | 1.66285                       | 1.53828                       | 1.6267                        |
| PRDX2              | 1.57668                       | 1.82956                       | 1.91019                       |
| BUB1               | 1.28399                       | 1.58465                       | 1.69996                       |
| CDC2               | 1.6531                        | 1.85679                       | 1.98708                       |
| POLR1C             | 1.6381                        | 1.64767                       | 1.91436                       |
| SLC19A1            | 0.83645                       | 1.04821                       | 1.47966                       |
| TOMM20             | 1.35635                       | 1.59622                       | 1.80767                       |
| MMP3               | 1.88298                       | 1.97448                       | 1.97642                       |

| <b>HGNC Symbol</b> | <b>ratioDiff_6Tc vs 100Tc</b> | <b>ratioDiff_5Tc vs 100Tc</b> | <b>ratioDiff_4Tc vs 100Tc</b> |
|--------------------|-------------------------------|-------------------------------|-------------------------------|
| UBE2C              | 1.57778                       | 1.74948                       | 1.96342                       |
| PTPN2              | 1.70427                       | 1.94261                       | 1.87898                       |
| RUVBL1             | 1.54869                       | 1.79738                       | 1.90429                       |
| TYMS               | 1.63058                       | 1.70477                       | 1.99201                       |
| DDX10              | 1.29899                       | 1.66308                       | 1.68951                       |
| TUFM               | 1.36602                       | 1.71366                       | 1.77032                       |
| AURKB              | 1.74438                       | 1.5449                        | 1.75756                       |
| RRS1               | 1.38947                       | 1.55856                       | 1.64316                       |
| GEMIN4             | 1.65714                       | 1.9546                        | 1.90466                       |
| PTMA               | 1.48539                       | 1.69408                       | 1.97339                       |
| CYP51A1            | 1.0858                        | 1.37852                       | 1.3979                        |
| ARHGEF5            | 1.19298                       | 0.29935                       | 1.24134                       |
| KIAA0690           | 1.14765                       | 1.5509                        | 1.72484                       |
| VDAC1              | 1.22339                       | 1.33462                       | 1.6755                        |
| DDX1               | 1.25017                       | 1.62039                       | 1.61687                       |
| SCAMP1             | 0.85166                       | 1.35067                       | 1.54701                       |
| DDX18              | 1.18135                       | 1.50316                       | 1.54127                       |
| PES1               | 1.47171                       | 1.71151                       | 1.71442                       |
| RANGAP1            | 1.37388                       | 1.44133                       | 1.48451                       |
| APEX1              | 1.54085                       | 1.67068                       | 1.86064                       |
| MYBL2              | 1.40542                       | 1.52269                       | 1.65744                       |
| USP10              | 0.63669                       | 2.03409                       | 1.69649                       |
| n.a.               | 1.16301                       | 1.73467                       | 1.40168                       |
| RPA3               | 1.65984                       | 1.54568                       | 1.84241                       |
| CXCL12             | 1.41663                       | 1.1107                        | 1.81305                       |
| n.a.               | 1.4152                        | 0.93186                       | 1.92143                       |
| MCM3               | 1.0957                        | 1.7133                        | 1.62388                       |
| GMNN               | 1.49957                       | 1.38504                       | 1.65636                       |
| HSPA9B             | 1.41819                       | 1.50618                       | 1.68934                       |
| TCERG1             | 1.43166                       | 1.41557                       | 1.54893                       |
| RNU3IP2            | 1.37878                       | 1.45174                       | 1.6849                        |
| SFRS7              | 1.36419                       | 1.65024                       | 1.71178                       |
| MSH6               | 1.29411                       | 1.52402                       | 1.84194                       |
| CENPF              | 1.3468                        | 1.72191                       | 1.71199                       |
| MXI1               | 1.3135                        | 1.31743                       | 1.19626                       |
| AMD1               | 1.46884                       | 1.75988                       | 1.81387                       |
| ELK1               | 1.25578                       | 1.25589                       | 1.53549                       |
| ILF3               | 1.27684                       | 1.69743                       | 1.45194                       |
| TFDP1              | 1.30899                       | 1.19587                       | 1.54643                       |
| n.a.               | 1.46097                       | 1.43448                       | 1.63248                       |
| TOP2A              | 1.32611                       | 1.33342                       | 1.72915                       |
| EIF5A              | 1.4407                        | 1.31863                       | 1.61858                       |
| n.a.               | 1.3424                        | 1.48857                       | 2.53246                       |
| n.a.               | 1.26981                       | 1.47297                       | 1.59543                       |
| ATIC               | 1.31938                       | 1.6846                        | 1.784                         |
| ATIC               | 1.34126                       | 1.44386                       | 1.60867                       |
| PEX5               | 1.02944                       | 1.43278                       | 1.44383                       |
| TAF4B              | 1.27715                       | 0.78418                       | 1.59577                       |
| HDGF               | 1.40911                       | 1.43719                       | 1.51037                       |
| HDGF               | 1.40055                       | 1.70753                       | 1.58303                       |
| ILF2               | 1.39121                       | 1.55236                       | 1.55894                       |
| CCNA2              | 1.65893                       | 1.32234                       | 1.69948                       |
| MDH2               | 1.42357                       | 1.73773                       | 1.74186                       |
| PEG10              | 2.46209                       | 2.23414                       | 1.70597                       |
| PPRC1              | 1.31446                       | 1.49879                       | 1.73975                       |
| SSRP1              | 1.35381                       | 1.49549                       | 1.75099                       |
| PTK9               | 0.78374                       | 1.1719                        | 1.95839                       |

| <b>HGNC Symbol</b> | <b>ratioDiff_6Tc vs 100Tc</b> | <b>ratioDiff_5Tc vs 100Tc</b> | <b>ratioDiff_4Tc vs 100Tc</b> |
|--------------------|-------------------------------|-------------------------------|-------------------------------|
| ACSL1              | 1.05562                       | 1.3981                        | 1.38136                       |
| PFKM               | 1.53198                       | 1.85416                       | 1.84244                       |
| HNRPDL             | 1.18311                       | 1.38335                       | 1.43917                       |
| RPIA               | 1.17079                       | 1.51594                       | 1.79342                       |
| SLC16A1            | 1.49252                       | 0.65561                       | 1.86384                       |
| KCNJ6              | 1.44304                       | 1.5021                        | 1.71109                       |
| SFRS2              | 1.11256                       | 1.35913                       | 1.45094                       |
| PRKCI              | 1.32665                       | 1.20011                       | 1.5112                        |
| POLR2H             | 1.68864                       | 1.69291                       | 1.76266                       |
| ABCE1              | 0.96334                       | 1.46254                       | 2.75349                       |
| MELK               | 1.1531                        | 1.28846                       | 1.56933                       |
| DDX21              | 1.68681                       | 1.52334                       | 3.37362                       |
| SSSCA1             | 1.34237                       | 1.48112                       | 1.57811                       |
| n.a.               | 1.32206                       | 1.476                         | 1.63967                       |
| HSPCA              | 1.54057                       | 1.41137                       | 2.02849                       |
| DEAF1              | 1.23974                       | 1.42025                       | 1.57268                       |
| n.a.               | 1.20198                       | 1.71333                       | 1.63954                       |
| EIF1AX             | 1.42727                       | 1.54594                       | 2.14374                       |
| n.a.               | 1.37967                       | 1.55072                       | 1.67411                       |
| n.a.               | 1.18893                       | 1.20466                       | 1.34098                       |
| SF3A3              | 1.3409                        | 1.25199                       | 1.42738                       |
| n.a.               | 1.95846                       | 1.8929                        | 1.52947                       |
| AK2                | 1.03793                       | 1.33934                       | 1.58498                       |
| PLAUR              | 2.31965                       | 4.95749                       | 4.31479                       |
| SCARB1             | 1.34649                       | 1.49581                       | 1.44399                       |
| MCM2               | 1.41763                       | 1.60275                       | 1.58334                       |
| EXOSC7             | 1.49572                       | 1.43067                       | 1.56325                       |
| KHSRP              | 1.19079                       | 1.44352                       | 1.53272                       |
| NUDC               | 1.43608                       | 1.48229                       | 1.47768                       |
| CGRRF1             | 1.34957                       | 1.76849                       | 1.54921                       |
| APEX1              | 1.34581                       | 1.54524                       | 1.63411                       |
| GARS               | 1.19508                       | 1.41018                       | 1.44792                       |
| EIF3S9             | 1.39024                       | 1.52765                       | 1.6301                        |
| IMPDH1             | 1.24664                       | 1.49884                       | 1.44751                       |
| VEGF               | 1.03044                       | 0.96363                       | 1.564                         |
| TFDP2              | 1.01517                       | 1.05677                       | 1.67127                       |
| PRDX1              | 1.26841                       | 1.40978                       | 1.54272                       |
| SCO2               | 1.74361                       | 1.61204                       | 1.97416                       |
| TUBG1              | 1.23565                       | 1.61129                       | 1.80625                       |
| MYCN               | 1.41986                       | 1.40047                       | 1.67606                       |
| ABL2               | 0.96056                       | 1.21173                       | 1.24694                       |
| SLC20A1            | 1.45071                       | 1.99997                       | 1.63072                       |
| CDKN2B             | 2.64784                       | 1.761                         | 1.7792                        |
| n.a.               | 1.21262                       | 1.66423                       | 1.57628                       |
| FANCG              | 1.44508                       | 1.48016                       | 1.65057                       |
| PMPCA              | 1.19616                       | 1.49273                       | 1.29986                       |
| PSMC3              | 1.38664                       | 1.30797                       | 1.52169                       |
| MCM7               | 1.46905                       | 1.57033                       | 1.60345                       |
| ABCA3              | 1.16464                       | 1.64454                       | 1.46588                       |
| EIF4EBP1           | 1.2625                        | 1.32854                       | 1.33156                       |
| TNFRSF4            | 1.31431                       | 1.14723                       | 1.28288                       |
| SRP72              | 1.29724                       | 1.33775                       | 1.58723                       |
| ALG3               | 1.2302                        | 1.2188                        | 1.32756                       |
| CKS1B              | 1.30073                       | 1.56062                       | 1.54686                       |
| NSEP1              | 1.35999                       | 1.42518                       | 1.56026                       |
| FARSLA             | 1.32818                       | 1.3299                        | 1.5047                        |
| PRIM1              | 1.20708                       | 1.28638                       | 1.4941                        |

| HGNC Symbol | ratioDiff_6Tc vs 100Tc | ratioDiff_5Tc vs 100Tc | ratioDiff_4Tc vs 100Tc |
|-------------|------------------------|------------------------|------------------------|
| TBL3        | 1.23711                | 1.38175                | 1.49383                |
| JUND        | 1.39854                | 1.31856                | 1.4348                 |
| PTBP1       | 1.15617                | 1.36786                | 1.43175                |
| MRE11A      | 1.43326                | 1.30143                | 1.56588                |
| HSPA5       | 1.23214                | 1.30682                | 1.43533                |
| OAT         | 1.11385                | 1.20277                | 1.7458                 |
| TFRC        | 1.01142                | 1.1663                 | 1.24182                |
| SHMT1       | 1.92542                | 1.33317                | 1.52502                |
| CLNS1A      | 1.24154                | 1.37863                | 1.39875                |
| SEMA3C      | 1.42359                | 2.16307                | 0.60205                |
| MCAM        | 1.09568                | 1.33053                | 1.38685                |
| MAPKAPK5    | 1.4306                 | 1.32714                | 1.30618                |
| SIP1        | 1.33596                | 1.3053                 | 1.21266                |
| NF2         | 1.37248                | 1.30174                | 1.45042                |
| SLC1A5      | 1.57681                | 2.00982                | 1.85443                |
| PSMA2       | 1.17445                | 1.32753                | 1.37957                |
| RAD51C      | 0.98008                | 1.0806                 | 1.18319                |
| CTSC        | 1.07321                | 1.0949                 | 1.36775                |
| HSPA8       | 1.34564                | 1.4386                 | 1.63389                |
| n.a.        | 0.50858                | 1.19812                | 0.99952                |
| IGFBP2      | 1.04942                | 0.97923                | 1.20325                |
| DARS        | 1.05074                | 1.34506                | 1.36797                |
| UCHL3       | 1.1508                 | 1.33321                | 1.50905                |
| GTF3A       | 1.1458                 | 1.42162                | 1.36544                |
| RPL5        | 1.19306                | 1.35436                | 1.54653                |
| AMD1        | 0.91694                | 1.35458                | 1.30986                |
| HSPA1A      | 2.50251                | 2.02209                | 1.68169                |
| SYNGR3      | 0.98368                | 1.03472                | 1.31079                |
| NINJ1       | 0.90496                | 0.56941                | 1.04925                |
| SNRPA1      | 1.36757                | 1.42166                | 1.37707                |
| TAF9        | 1.16729                | 1.2921                 | 1.36929                |
| SYNCRIP     | 1.23111                | 1.70773                | 1.75101                |
| n.a.        | 1.30608                | 1.3199                 | 1.42706                |
| ITGB3BP     | 1.23727                | 1.2678                 | 1.58749                |
| PTPRF       | 0.78533                | 1.44589                | 1.29964                |
| CHEK1       | 1.28042                | 1.32372                | 1.37843                |
| TCEB1       | 1.12161                | 1.37051                | 1.38793                |
| n.a.        | 1.27772                | 1.42337                | 1.38203                |
| VBP1        | 1.08205                | 1.15711                | 1.37953                |
| BUB1B       | 1.28166                | 1.57021                | 1.43236                |
| RACGAP1     | 1.25419                | 1.42432                | 1.59703                |
| AK3         | 0.97056                | 3.3664                 | 1.73792                |
| HNRPF       | 1.2064                 | 1.48182                | 1.5015                 |
| PDAP1       | 1.36813                | 1.10505                | 1.43392                |
| SELE        | 1.17509                | 1.34232                | 1.29611                |
| n.a.        | 1.22682                | 1.58391                | 1.72964                |
| RCN1        | 0.63597                | 2.03976                | 1.55543                |
| GLDC        | 1.06106                | 1.17037                | 1.20599                |
| PMS1        | 0.88411                | 1.16837                | 1.72631                |
| PFKP        | 1.04765                | 1.13303                | 1.15028                |
| PDCD2       | 1.25076                | 1.29272                | 1.53306                |
| MGST2       | 1.14382                | 1.24924                | 1.21992                |
| NDUFB7      | 1.26941                | 1.17246                | 1.36696                |
| G22P1       | 1.23504                | 1.37817                | 1.43209                |
| n.a.        | 1.16331                | 1.28916                | 1.29282                |
| PBEF1       | 1.26953                | 1.01908                | 0.85629                |
| TBL2        | 1.34037                | 1.09588                | 1.5104                 |



| HGNC Symbol | ratioDiff_6Tc vs 100Tc | ratioDiff_5Tc vs 100Tc | ratioDiff_4Tc vs 100Tc |
|-------------|------------------------|------------------------|------------------------|
| GCN5L2      | 1.18565                | 1.53618                | 1.29113                |
| CDK2AP1     | 1.08947                | 1.28619                | 1.29295                |
| NOL1        | 1.29501                | 1.16495                | 1.3197                 |
| SLC29A1     | 0.9107                 | 0.95277                | 1.23615                |
| BNIP1       | 2.07308                | 1.37236                | 1.52779                |
| DBN1        | 0.89039                | 1.15516                | 1.16155                |
| EIF4G1      | 1.19633                | 1.354                  | 1.44219                |
| B4GALT2     | 1.12376                | 1.23139                | 1.11688                |
| TMEM5       | 1.01788                | 1.20934                | 1.2524                 |
| FVT1        | 0.15944                | 1.58378                | 1.24199                |
| ETF1        | 1.41824                | 1.62946                | 1.78485                |
| ATF4        | 1.0212                 | 0.99316                | 1.15285                |
| ILF3        | 1.23224                | 1.46661                | 1.4456                 |
| RAMP1       | 1.18455                | 0.61564                | 1.09466                |
| n.a.        | 1.19947                | 1.30391                | 1.29219                |
| ADCY3       | 0.79299                | 0.97611                | 1.12168                |
| AFG3L2      | 1.14608                | 1.2803                 | 1.29512                |
| PRPS1       | 1.26991                | 1.04015                | 1.35957                |
| OPRS1       | 0.85733                | 1.15606                | 1.0864                 |
| TOMM70A     | 1.51196                | 1.42919                | 1.9022                 |
| APRT        | 1.44246                | 1.38176                | 1.46593                |
| FGFR4       | 1.09695                | 0.62692                | 1.13336                |
| DEFA6       | 1.87951                | 0.81984                | 1.95287                |
| ZNF9        | 2.00292                | 2.18833                | 7.24229                |
| RAC3        | 0.19521                | 3.4411                 | 2.48214                |
| WNT10B      | 0.90817                | 4.32133                | 3.7414                 |
| NFRKB       | 1.39616                | 0.97651                | 1.60998                |
| CDK5R2      | 0.31257                | 1.16259                | 0.68765                |
| CYCS        | 0.81954                | 2.38292                | 1.82884                |
| YES1        | 1.00476                | 0.93581                | 1.22672                |
| DLEU1       | 1.17498                | 1.12858                | 1.32786                |
| BNIP3       | 1.09549                | 1.0033                 | 1.14375                |
| RAD23A      | 1.1333                 | 1.27838                | 1.39914                |
|             | 1.3958                 | 3.78709                | 1.72                   |
| UBE2G2      | 1.18656                | 1.37832                | 1.45728                |
| KCNQ3       | 1.01398                | 0.63747                | 0.65028                |
| MTA1        | 1.13924                | 1.0163                 | 1.18657                |
| LIG3        | 1.14915                | 0.99918                | 1.32903                |
| ITGA2B      | 1.28758                | 1.89885                | 1.71598                |
| TOMM34      | 0.90409                | 0.35709                | 2.44076                |
| ITIH4       | 1.20227                | 1.2289                 | 1.44091                |
| POLD1       | 1.27841                | 1.23885                | 1.32148                |
| IKBKAP      | 0.9328                 | 1.18483                | 1.22793                |
| ASNS        | 0.8199                 | 0.87529                | 1.18092                |
| MX1         | 0.81876                | 1.01753                | 1.3563                 |
| XRCC5       | 1.55747                | 1.89786                | 2.07611                |
| XPO1        | 1.11758                | 1.31164                | 1.39555                |
| RAD54L      | 1.68937                | 1.70003                | 1.422                  |
| PTHLH       | 0.93206                | 1.28298                | 0.26569                |
| MSH2        | 1.22944                | 1.39876                | 1.67335                |
| CDKL1       | 1.27422                | 2.59521                | 1.17348                |
| ADA         | 1.29998                | 1.22812                | 1.37405                |
| n.a.        | 1.0138                 | 1.24452                | 1.05187                |
| TGFB1       | 0.88889                | 7.10936                | 0.69789                |
| NPTX2       | 1.71847                | 1.61177                | 0.35312                |
| BAG1        | 1.17362                | 1.3072                 | 1.19474                |
| BAG1        | 1.17525                | 1.20341                | 1.10759                |

| <b>HGNC Symbol</b> | <b>ratioDiff_6Tc vs 100Tc</b> | <b>ratioDiff_5Tc vs 100Tc</b> | <b>ratioDiff_4Tc vs 100Tc</b> |
|--------------------|-------------------------------|-------------------------------|-------------------------------|
| SHB                | 0.84765                       | 0.88004                       | 1.03833                       |
| EIF3S10            | 1.14591                       | 1.37776                       | 1.35358                       |
| HTATIP2            | 1.6758                        | 1.15264                       | 1.47362                       |
| CALCA              | 1.44599                       | 1.57128                       | 1.61023                       |
| C6orf108           | 1.27696                       | 1.31296                       | 1.43525                       |
| ACY1               | 1.15447                       | 1.07613                       | 1.42712                       |
| PASK               | 0.77175                       | 0.6829                        | 0.77769                       |
| CEBPZ              | 1.06497                       | 1.19553                       | 1.30525                       |
| RAP1A              | 0.67928                       | 1.06945                       | 0.95514                       |
| NID                | 1.80346                       | 3.16872                       | 3.41103                       |
| IDE                | 1.16389                       | 1.12688                       | 1.32239                       |
| HOXB7              | 1.19832                       | 0.71134                       | 1.0822                        |
| GUCY1B2            | 1.47788                       | 1.40074                       | 1.52368                       |
| SERPINA7           | 1.25204                       | 1.1769                        | 1.51905                       |
| FPRL2              | 1.25372                       | 1.3291                        | 1.28725                       |
| MTRR               | 1.04965                       | 1.37959                       | 1.2704                        |
| THRA               | 1.0731                        | 1.22143                       | 1.21715                       |
| POR                | 1.13954                       | 1.33435                       | 1.13064                       |
| YWHAH              | 1.17877                       | 1.29924                       | 1.48519                       |
| TRIM28             | 1.36011                       | 1.46573                       | 1.5112                        |
| DHX30              | 1.30156                       | 1.35335                       | 1.35254                       |
| CDK8               | 0.89522                       | 0.94533                       | 1.50464                       |
| CCNH               | 1.02629                       | 1.17347                       | 1.1388                        |
| RFK                | 1.14418                       | 1.40914                       | 1.46824                       |
| RABGGTB            | 1.13529                       | 1.15813                       | 1.16389                       |
| PLK4               | 1.1231                        | 1.33374                       | 1.25495                       |
| CYP4B1             | 0.81355                       | 1.54551                       | 0.94931                       |
| TP53BP2            | 1.35674                       | 1.51305                       | 1.13398                       |
| NVL                | 1.08326                       | 1.34043                       | 1.38316                       |
| ARF1               | 0.98633                       | 1.28356                       | 1.12594                       |
| PLK2               | 0.95277                       | 0.77905                       | 0.80503                       |
| GZMA               | 1.09549                       | 1.41137                       | 1.24976                       |
| NOLA2              | 1.24852                       | 1.06095                       | 1.02717                       |
| HMBS               | 1.46905                       | 1.67248                       | 1.5853                        |
| ITIH2              | 0.71147                       | 1.28372                       | 1.16288                       |
| SACS               | 1.06878                       | 1.12275                       | 0.9261                        |
| GABPA              | 1.11316                       | 1.46483                       | 1.59847                       |
| ETS2               | 0.98439                       | 1.03957                       | 1.09818                       |
| IL8RA              | 1.20766                       | 1.13181                       | 1.43267                       |
| API5               | 1.6649                        | 3.10374                       | 2.12926                       |
| n.a.               | 1.14312                       | 1.07736                       | 1.22184                       |
| ICT1               | 2.12424                       | 1.23888                       | 1.14807                       |
| DFFB               | 0.92897                       | 1.05236                       | 1.00404                       |
| USP7               | 0.99249                       | 1.08675                       | 1.10627                       |
| PAP                | 1.20722                       | 1.20541                       | 1.13253                       |
| BSG                | 0.84388                       | 1.0299                        | 1.1167                        |
| YIF1               | 1.27416                       | 1.45378                       | 1.37105                       |
| POLE               | 2.01802                       | 1.19232                       | 1.31779                       |
|                    | 1.07274                       | 2.59249                       | 1.10129                       |

| <b>HGNC Symbol</b> | <b>ratioDiff_3Tc vs 100Tc</b> | <b>ratioDiff_2Tc vs 100Tc</b> | <b>ratioDiff_1 5Tc vs 100Tc</b> |
|--------------------|-------------------------------|-------------------------------|---------------------------------|
| MYC                | 13.11573                      | 21.17833                      | 26.06885                        |
| CACNA1G            | 5.55876                       | 6.40089                       | 6.68435                         |
| NME1               | 7.35152                       | 9.80579                       | 11.12337                        |
| ADCY2              | 3.06001                       | 2.03685                       | 2.34019                         |
| C4orf9             | 3.42652                       | 3.20666                       | 3.31588                         |
| FKBP5              | 5.90076                       | 6.55599                       | 9.51036                         |
| CRKL               | 2.59587                       | 8.10613                       | 3.98033                         |
| RFC5               | 12.10905                      | 15.88817                      | 19.18292                        |
| PPP2CA             | 6.42169                       | 7.12388                       | 9.79533                         |
| TIMM8A             | 5.78616                       | 3.46901                       | 6.37967                         |
| n.a.               | 8.91352                       | 6.3907                        | 6.05618                         |
| MAD2L1             | 12.3419                       | 22.41183                      | 20.32034                        |
| MRPL12             | 3.08798                       | 3.63391                       | 4.02403                         |
| NME1               | 6.1018                        | 8.51046                       | 9.64544                         |
| METTL1             | 4.33956                       | 4.79779                       | 5.62588                         |
| SLC7A5             | 3.67267                       | 9.09594                       | 7.41599                         |
| SRM                | 4.51071                       | 5.83574                       | 6.43193                         |
| IL1B               | 2.89179                       | 2.4634                        | 3.36876                         |
| PAICS              | 5.98648                       | 7.71481                       | 8.25106                         |
| TOMM40             | 2.9864                        | 3.89912                       | 4.73016                         |
| PYCR1              | 5.06488                       | 7.28193                       | 8.88317                         |
| UMPK               | 2.87093                       | 3.44335                       | 4.0815                          |
| LRP8               | 2.58755                       | 4.07592                       | 4.01285                         |
| DUSP14             | 7.28652                       | 15.32848                      | 3.63227                         |
| METAP1             | 2.85821                       | 3.71819                       | 3.63575                         |
| ABCE1              | 3.0779                        | 4.42506                       | 4.01333                         |
| PA2G4              | 3.49131                       | 4.04725                       | 5.29434                         |
| BOP1               | 2.99582                       | 3.16191                       | 4.37029                         |
| RANBP1             | 3.97853                       | 4.58428                       | 5.32856                         |
| CTPS               | 3.3416                        | 4.06858                       | 4.79479                         |
| TRAP1              | 4.46685                       | 5.89092                       | 7.08906                         |
| HSPD1              | 4.7571                        | 5.97775                       | 7.64331                         |
| PFAS               | 3.39264                       | 4.42702                       | 5.28414                         |
| TEAD4              | 3.26571                       | 4.36685                       | 5.07555                         |
| MIF                | 2.68197                       | 3.08827                       | 3.66679                         |
| VAR2               | 2.85023                       | 3.34788                       | 4.34955                         |
| CENTG1             | 3.99745                       | 5.41579                       | 6.99128                         |
| DSCR2              | 4.02502                       | 5.271                         | 5.78745                         |
| JAG2               | 3.42931                       | 4.30959                       | 5.33996                         |
| PRKAR1B            | 2.9178                        | 3.08907                       | 3.05459                         |
| n.a.               | 2.64887                       | 2.71032                       | 3.17837                         |
| MATK               | 2.99194                       | 4.51007                       | 4.31026                         |
| IARS               | 2.39723                       | 3.47795                       | 3.44154                         |
| GAL                | 4.60843                       | 6.5576                        | 8.84941                         |
| MCAM               | 2.63238                       | 3.014                         | 4.28346                         |
| CAD                | 2.91879                       | 3.51196                       | 4.39815                         |
| FH                 | 3.00131                       | 3.63388                       | 4.24662                         |
| SRPK1              | 3.22641                       | 4.39484                       | 4.58202                         |
| NEFH               | 34.32732                      | 32.40066                      | 37.52651                        |
| NP                 | 2.6348                        | 3.0029                        | 3.73352                         |
| AHCY               | 2.81402                       | 4.13553                       | 4.30424                         |
| POLD2              | 2.32129                       | 2.95247                       | 3.73194                         |
| C1QBP              | 3.19004                       | 4.17922                       | 4.65361                         |
| CAMKK2             | 3.54622                       | 3.81196                       | 4.38879                         |
| n.a.               | 3.06129                       | 3.25807                       | 4.04027                         |
| BYSL               | 2.69546                       | 2.52688                       | 3.25474                         |
| NUP155             | 2.39694                       | 3.39124                       | 3.28079                         |

| <b>HGNC Symbol</b> | <b>ratioDiff_3Tc vs 100Tc</b> | <b>ratioDiff_2Tc vs 100Tc</b> | <b>ratioDiff_1 5Tc vs 100Tc</b> |
|--------------------|-------------------------------|-------------------------------|---------------------------------|
| IFRD2              | 3.83553                       | 5.45814                       | 5.6542                          |
| MRPL3              | 3.14418                       | 4.01065                       | 4.63103                         |
| HSPE1              | 3.22456                       | 4.92942                       | 5.02204                         |
| HSPE1              | 3.3612                        | 4.5916                        | 4.91382                         |
| n.a.               | 2.50168                       | 3.31217                       | 3.59429                         |
| EBNA1BP2           | 3.04535                       | 3.72904                       | 4.5457                          |
| TNFRSF8            | 4.47339                       | 5.67884                       | 8.8153                          |
| PRDX4              | 3.62518                       | 4.1845                        | 5.20667                         |
| CSE1L              | 4.0741                        | 4.30929                       | 4.2079                          |
| RPP40              | 3.23948                       | 8.15883                       | 5.68718                         |
| n.a.               | 5.63691                       | 3.91489                       | 8.52168                         |
| HRMT1L2            | 2.6766                        | 3.40082                       | 3.91463                         |
| n.a.               | 2.43178                       | 3.33003                       | 3.54306                         |
| n.a.               | 2.97261                       | 3.46612                       | 4.529                           |
| MADH4              | 2.7561                        | 3.38791                       | 4.60386                         |
| IL9                | 2.71922                       | 2.88726                       | 3.52769                         |
| PDCD11             | 2.11052                       | 2.63502                       | 2.98456                         |
| HK2                | 2.97316                       | 6.14039                       | 3.06521                         |
| PWP2H              | 2.27695                       | 2.85                          | 3.03675                         |
| n.a.               | 4.23425                       | 4.66391                       | 6.60921                         |
| NOLC1              | 3.29637                       | 4.73757                       | 4.54123                         |
| NOLC1              | 2.96016                       | 3.31189                       | 4.08686                         |
| CCT2               | 2.6524                        | 3.29523                       | 3.48001                         |
| DTYMK              | 2.49677                       | 2.8296                        | 3.53333                         |
| HNRPAB             | 2.78865                       | 3.43486                       | 3.73266                         |
| FASN               | 4.31382                       | 6.39053                       | 7.2928                          |
| FASN               | 2.82912                       | 4.37649                       | 4.53848                         |
| NMB                | 2.34896                       | 2.80413                       | 4.20309                         |
| CHC1               | 3.25422                       | 3.70893                       | 3.931                           |
|                    | 3.2359                        | 4.66654                       | 5.6421                          |
| KIAA0179           | 2.20729                       | 3.09668                       | 3.78402                         |
| NTHL1              | 2.69877                       | 2.88481                       | 3.73981                         |
| UNG                | 2.64743                       | 3.89127                       | 3.72097                         |
| KIAA0020           | 2.45173                       | 3.0628                        | 3.25393                         |
| n.a.               | 2.46973                       | 2.85156                       | 3.0262                          |
| n.a.               | 2.73111                       | 3.04541                       | 3.35436                         |
| POLE2              | 2.69124                       | 2.39273                       | 3.28753                         |
| MTHFD1             | 2.49816                       | 2.8522                        | 3.06417                         |
| NOL5A              | 2.45636                       | 2.96397                       | 3.42436                         |
| PRPS2              | 2.48554                       | 3.20592                       | 3.2613                          |
| RUVBL2             | 2.4332                        | 2.85719                       | 3.45679                         |
| GPI                | 2.3611                        | 2.47657                       | 3.45562                         |
| n.a.               | 2.54                          | 2.97707                       | 3.73295                         |
| NPM3               | 3.32762                       | 4.42402                       | 4.23353                         |
| n.a.               | 3.11147                       | 4.04051                       | 4.5615                          |
| CDC20              | 2.63075                       | 2.78986                       | 3.36151                         |
| n.a.               | 2.47137                       | 3.33849                       | 3.24681                         |
| PRKDC              | 2.42545                       | 2.74548                       | 3.03527                         |
| CKS2               | 2.35955                       | 2.86347                       | 2.92115                         |
| CSE1L              | 2.85022                       | 3.37157                       | 4.36284                         |
| EEF1E1             | 3.10271                       | 4.3193                        | 4.03704                         |
| HRMT1L2            | 2.445                         | 3.22009                       | 3.47098                         |
| n.a.               | 2.77605                       | 2.98994                       | 3.69024                         |
| TST                | 2.19737                       | 2.40475                       | 2.79054                         |
| DKC1               | 2.38085                       | 2.77555                       | 3.42876                         |
| RAN                | 2.73601                       | 3.19216                       | 2.82854                         |
| PDGFRA             | 2.38752                       | 3.6968                        | 3.39889                         |

| <b>HGNC Symbol</b> | <b>ratioDiff_3Tc vs 100Tc</b> | <b>ratioDiff_2Tc vs 100Tc</b> | <b>ratioDiff_1 5Tc vs 100Tc</b> |
|--------------------|-------------------------------|-------------------------------|---------------------------------|
| CDK4               | 5.21739                       | 4.28043                       | 7.14526                         |
| ALDH1B1            | 2.33893                       | 2.34634                       | 2.66675                         |
| SORD               | 3.05798                       | 3.48671                       | 4.01693                         |
| BDH                | 2.38999                       | 2.54767                       | 3.59211                         |
| GMPS               | 2.42142                       | 2.92137                       | 3.46375                         |
| GPR30              | 2.51901                       | 2.87735                       | 4.02997                         |
| PHB                | 2.70203                       | 3.42971                       | 3.9659                          |
| STRA13             | 2.93112                       | 3.7031                        | 4.18997                         |
| XPOT               | 2.96685                       | 3.28927                       | 4.04917                         |
| SMN1               | 2.09572                       | 2.25422                       | 2.61082                         |
| CHC1               | 2.77219                       | 3.11053                       | 3.4607                          |
| PLK1               | 2.41324                       | 3.5006                        | 3.7431                          |
| n.a.               | 3.30157                       | 4.20236                       | 3.71866                         |
| AK2                | 2.24136                       | 2.60973                       | 3.01149                         |
| n.a.               | 2.29635                       | 3.10695                       | 2.91121                         |
| MGST1              | 3.1245                        | 2.9063                        | 3.36254                         |
| CSDA               | 2.13307                       | 2.36175                       | 2.92288                         |
| n.a.               | 2.32364                       | 2.47389                       | 2.77128                         |
| ATP1B3             | 2.1113                        | 2.69327                       | 2.73718                         |
| BCS1L              | 2.26679                       | 2.46232                       | 3.02763                         |
| UNG                | 2.27898                       | 3.01784                       | 3.16144                         |
| PBP                | 2.1434                        | 2.48968                       | 3.13118                         |
| CDC6               | 2.45582                       | 2.56985                       | 3.21684                         |
| CDC7               | 2.64609                       | 3.3473                        | 3.2567                          |
| MTAP               | 2.01895                       | 3.13985                       | 2.60402                         |
| ADSL               | 2.00854                       | 2.31834                       | 2.87848                         |
| CDKN3              | 2.46837                       | 3.03378                       | 2.82948                         |
| VRK1               | 2.03379                       | 2.25423                       | 2.21444                         |
| WFDC2              | 2.08412                       | 2.63314                       | 2.71323                         |
| GSPT1              | 2.06898                       | 2.38976                       | 2.53225                         |
| SLC39A14           | 2.55303                       | 3.8471                        | 4.0475                          |
| n.a.               | 2.19733                       | 2.88371                       | 3.11043                         |
| RLN2               | 2.32583                       | 2.16321                       | 2.48651                         |
| BAG2               | 2.04647                       | 2.38296                       | 2.3735                          |
| HSD17B8            | 2.4016                        | 2.4857                        | 3.36852                         |
| UCHL3              | 2.06257                       | 2.59132                       | 2.60867                         |
| NME2               | 2.43789                       | 2.61647                       | 2.93229                         |
| MRPS12             | 2.01792                       | 2.35097                       | 2.70461                         |
| PCNA               | 2.23495                       | 2.43077                       | 2.57957                         |
| DPH2L2             | 2.21414                       | 2.71201                       | 3.30122                         |
| CCNB1              | 2.34069                       | 2.82208                       | 2.9398                          |
| MC1R               | 2.54872                       | 3.06729                       | 4.05467                         |
| SOD1               | 2.13094                       | 2.63096                       | 2.68426                         |
| ATP5G3             | 2.01797                       | 2.29227                       | 2.74529                         |
| CCT3               | 2.24354                       | 2.37697                       | 2.83264                         |
| RFC4               | 2.17779                       | 2.62455                       | 2.71957                         |
| CDC25A             | 2.11938                       | 2.23875                       | 2.78681                         |
| FRDA               | 2.36888                       | 2.75345                       | 2.99976                         |
| SNRPD1             | 2.09972                       | 2.55053                       | 2.64326                         |
| CHAF1A             | 2.05101                       | 2.23695                       | 2.32871                         |
| PRDX2              | 2.20327                       | 2.40886                       | 3.36235                         |
| BUB1               | 2.01412                       | 2.44101                       | 2.62062                         |
| CDC2               | 2.34019                       | 2.88102                       | 2.73744                         |
| POLR1C             | 2.37136                       | 2.39968                       | 2.66301                         |
| SLC19A1            | 6.18694                       | 4.72295                       | 3.01465                         |
| TOMM20             | 2.07764                       | 2.56068                       | 2.70897                         |
| MMP3               | 2.33182                       | 2.67078                       | 3.49384                         |

| <b>HGNC Symbol</b> | <b>ratioDiff_3Tc vs 100Tc</b> | <b>ratioDiff_2Tc vs 100Tc</b> | <b>ratioDiff_1 5Tc vs 100Tc</b> |
|--------------------|-------------------------------|-------------------------------|---------------------------------|
| UBE2C              | 2.36155                       | 2.47949                       | 2.96123                         |
| PTPN2              | 2.65996                       | 3.06246                       | 3.47277                         |
| RUVBL1             | 2.06368                       | 2.50079                       | 2.70317                         |
| TYMS               | 2.07742                       | 2.27395                       | 2.38322                         |
| DDX10              | 2.09698                       | 2.59569                       | 2.58514                         |
| TUFM               | 2.04731                       | 2.17567                       | 2.7339                          |
| AURKB              | 2.21238                       | 2.4034                        | 2.57223                         |
| RRS1               | 2.10372                       | 2.80412                       | 2.99634                         |
| GEMIN4             | 2.1499                        | 2.40223                       | 2.77992                         |
| PTMA               | 2.3608                        | 2.69074                       | 2.91844                         |
| CYP51A1            | 1.64078                       | 2.21704                       | 2.44069                         |
| ARHGEF5            | 1.71096                       | 2.97458                       | 3.12292                         |
| KIAA0690           | 1.82813                       | 2.48757                       | 2.74485                         |
| VDAC1              | 1.74526                       | 2.44286                       | 2.19877                         |
| DDX1               | 1.9286                        | 2.1444                        | 2.37764                         |
| SCAMP1             | 1.68105                       | 2.00934                       | 2.8272                          |
| DDX18              | 1.66147                       | 2.25165                       | 2.19743                         |
| PES1               | 1.94327                       | 2.38792                       | 2.72053                         |
| RANGAP1            | 1.79942                       | 2.26594                       | 2.12772                         |
| APEX1              | 1.9782                        | 2.20126                       | 2.7381                          |
| MYBL2              | 1.90873                       | 2.5218                        | 2.38788                         |
| USP10              | 1.9306                        | 2.0833                        | 2.44318                         |
| n.a.               | 1.74267                       | 2.06561                       | 2.38999                         |
| RPA3               | 1.94007                       | 2.52789                       | 2.10001                         |
| CXCL12             | 1.85852                       | 2.09233                       | 2.34589                         |
| n.a.               | 1.75947                       | 2.09357                       | 2.63819                         |
| MCM3               | 1.98581                       | 2.39013                       | 2.19818                         |
| GMNN               | 1.91369                       | 2.30337                       | 2.29317                         |
| HSPA9B             | 1.9939                        | 2.15481                       | 2.52409                         |
| TCERG1             | 1.88379                       | 2.12908                       | 2.20921                         |
| RNU3IP2            | 1.89929                       | 2.4582                        | 2.86836                         |
| SFRS7              | 1.83473                       | 2.18597                       | 2.14227                         |
| MSH6               | 1.99363                       | 2.39288                       | 2.48281                         |
| CENPF              | 1.89439                       | 2.29573                       | 2.24953                         |
| MXI1               | 1.80239                       | 2.11941                       | 2.135                           |
| AMD1               | 1.9196                        | 2.43756                       | 2.39397                         |
| ELK1               | 1.54908                       | 2.02143                       | 2.07359                         |
| ILF3               | 1.88431                       | 2.13064                       | 2.52537                         |
| TFDP1              | 1.70851                       | 2.2382                        | 2.17637                         |
| n.a.               | 1.87351                       | 2.24748                       | 2.40202                         |
| TOP2A              | 1.94057                       | 2.15076                       | 2.07898                         |
| EIF5A              | 1.77209                       | 2.15931                       | 2.26745                         |
| n.a.               | 1.98259                       | 2.29706                       | 2.25136                         |
| n.a.               | 1.81903                       | 2.05254                       | 2.47649                         |
| ATIC               | 1.95968                       | 2.46525                       | 2.47984                         |
| ATIC               | 1.89584                       | 2.07723                       | 2.27432                         |
| PEX5               | 1.99741                       | 2.05921                       | 2.32912                         |
| TAF4B              | 1.8123                        | 2.13205                       | 2.01349                         |
| HDGF               | 1.85283                       | 2.0435                        | 2.29815                         |
| HDGF               | 1.98856                       | 2.22199                       | 2.48221                         |
| ILF2               | 1.87134                       | 2.02237                       | 2.35109                         |
| CCNA2              | 1.96678                       | 2.40726                       | 2.10283                         |
| MDH2               | 1.90377                       | 2.60622                       | 2.64823                         |
| PEG10              | 1.88138                       | 2.77629                       | 2.21727                         |
| PPRC1              | 1.91826                       | 2.39833                       | 2.69448                         |
| SSRP1              | 1.98113                       | 2.22046                       | 2.58201                         |
| PTK9               | 1.74734                       | 10.74686                      | 15.67224                        |

| <b>HGNC Symbol</b> | <b>ratioDiff_3Tc vs 100Tc</b> | <b>ratioDiff_2Tc vs 100Tc</b> | <b>ratioDiff_1 5Tc vs 100Tc</b> |
|--------------------|-------------------------------|-------------------------------|---------------------------------|
| ACSL1              | 1.67209                       | 2.49683                       | 2.61338                         |
| PFKM               | 1.96933                       | 2.38548                       | 3.23589                         |
| HNRPDL             | 1.76196                       | 2.0154                        | 2.08819                         |
| RPIA               | 1.76398                       | 2.44571                       | 2.63509                         |
| SLC16A1            | 1.54498                       | 2.56516                       | 3.15358                         |
| KCNJ6              | 1.8489                        | 2.08212                       | 2.19253                         |
| SFRS2              | 1.76825                       | 2.09721                       | 2.11701                         |
| PRKCI              | 1.62721                       | 2.30503                       | 4.78829                         |
| POLR2H             | 1.96646                       | 2.274                         | 2.72492                         |
| ABCE1              | 1.55991                       | 2.0614                        | 2.30309                         |
| MELK               | 1.76092                       | 2.21844                       | 2.14613                         |
| DDX21              | 1.33709                       | 2.72086                       | 2.646                           |
| SSSCA1             | 1.61987                       | 2.31451                       | 2.24889                         |
| n.a.               | 1.74626                       | 2.12788                       | 2.38463                         |
| HSPCA              | 1.55843                       | 2.16403                       | 2.39837                         |
| DEAF1              | 1.69562                       | 2.05664                       | 2.25179                         |
| n.a.               | 1.92193                       | 2.32045                       | 2.81974                         |
| EIF1AX             | 1.7661                        | 2.4927                        | 2.33677                         |
| n.a.               | 1.73497                       | 2.52681                       | 2.49597                         |
| n.a.               | 1.62294                       | 2.00053                       | 2.05847                         |
| SF3A3              | 1.62036                       | 1.98687                       | 2.01857                         |
| n.a.               | 2.01046                       | 1.88781                       | 2.21733                         |
| AK2                | 1.66779                       | 1.8936                        | 2.11445                         |
| PLAUR              | 3.14161                       | 1.97863                       | 3.49915                         |
| SCARB1             | 1.54626                       | 1.89872                       | 2.23497                         |
| MCM2               | 1.75544                       | 1.71356                       | 2.16229                         |
| EXOSC7             | 1.74717                       | 1.92946                       | 2.18852                         |
| KHSRP              | 1.67406                       | 1.91834                       | 2.15423                         |
| NUDC               | 1.67434                       | 1.85587                       | 2.0756                          |
| CGRRF1             | 2.16563                       | 1.85064                       | 2.34343                         |
| APEX1              | 1.68873                       | 1.76364                       | 2.24981                         |
| GARS               | 1.8577                        | 1.93443                       | 2.27537                         |
| EIF3S9             | 1.76491                       | 1.82618                       | 2.30478                         |
| IMPDH1             | 1.58961                       | 1.85123                       | 2.05051                         |
| VEGF               | 4.73812                       | 1.94291                       | 2.5559                          |
| TFDP2              | 1.69612                       | 1.836                         | 2.10575                         |
| PRDX1              | 1.60717                       | 1.89065                       | 2.05707                         |
| SCO2               | 1.835                         | 1.80502                       | 2.46641                         |
| TUBG1              | 1.97191                       | 1.87307                       | 2.41932                         |
| MYCN               | 1.64245                       | 1.65202                       | 2.05377                         |
| ABL2               | 1.42487                       | 1.54787                       | 9.99615                         |
| SLC20A1            | 1.81764                       | 1.82315                       | 2.16346                         |
| CDKN2B             | 2.12224                       | 1.42292                       | 2.24799                         |
| n.a.               | 1.49995                       | 1.93163                       | 2.25665                         |
| FANCG              | 1.84558                       | 1.92713                       | 2.25021                         |
| PMPCA              | 1.39397                       | 1.77646                       | 2.08026                         |
| PSMC3              | 1.5638                        | 1.74202                       | 2.00101                         |
| MCM7               | 1.88727                       | 1.77272                       | 2.10953                         |
| ABCA3              | 2.04587                       | 1.80847                       | 2.21206                         |
| EIF4EBP1           | 1.44348                       | 1.60906                       | 2.20363                         |
| TNFRSF4            | 0.9756                        | 1.92307                       | 2.09305                         |
| SRP72              | 1.3648                        | 1.61317                       | 2.01192                         |
| ALG3               | 1.48196                       | 1.66408                       | 2.44095                         |
| CKS1B              | 1.57172                       | 1.69886                       | 2.0868                          |
| NSEP1              | 1.75454                       | 1.93118                       | 2.26607                         |
| FARSLA             | 1.85024                       | 1.79068                       | 2.20319                         |
| PRIM1              | 1.77856                       | 1.75704                       | 2.19618                         |

| <b>HGNC Symbol</b> | <b>ratioDiff_3Tc vs 100Tc</b> | <b>ratioDiff_2Tc vs 100Tc</b> | <b>ratioDiff_1 5Tc vs 100Tc</b> |
|--------------------|-------------------------------|-------------------------------|---------------------------------|
| TBL3               | 1.65976                       | 1.7365                        | 1.99443                         |
| JUND               | 1.58372                       | 1.85818                       | 1.9196                          |
| PTBP1              | 1.48562                       | 2.42327                       | 1.73328                         |
| MRE11A             | 1.65826                       | 1.63339                       | 1.75464                         |
| HSPA5              | 1.52169                       | 1.50422                       | 1.91511                         |
| OAT                | 1.67448                       | 1.75015                       | 1.74451                         |
| TFRC               | 1.36136                       | 1.65318                       | 1.62295                         |
| SHMT1              | 1.67296                       | 1.87978                       | 1.89917                         |
| CLNS1A             | 1.58962                       | 1.88611                       | 1.87735                         |
| SEMA3C             | 1.89269                       | 2.38248                       | 1.61418                         |
| MCAM               | 1.41471                       | 1.97199                       | 1.96786                         |
| MAPKAPK5           | 1.55913                       | 1.66474                       | 1.82121                         |
| SIP1               | 2.03701                       | 2.2293                        | 1.83333                         |
| NF2                | 1.63676                       | 1.8572                        | 1.9114                          |
| SLC1A5             | 1.74928                       | 1.83156                       | 1.8496                          |
| PSMA2              | 1.58956                       | 1.82695                       | 1.8689                          |
| RAD51C             | 1.33001                       | 1.64797                       | 1.76893                         |
| CTSC               | 1.61216                       | 1.93882                       | 1.7539                          |
| HSPA8              | 1.58901                       | 2.04339                       | 1.97461                         |
| n.a.               | 1.39744                       | 1.70573                       | 1.59459                         |
| IGFBP2             | 1.275                         | 1.52863                       | 1.9553                          |
| DARS               | 1.41342                       | 1.97742                       | 1.78804                         |
| UCHL3              | 1.63483                       | 2.00625                       | 1.89131                         |
| GTF3A              | 1.52701                       | 1.73322                       | 1.90108                         |
| RPL5               | 1.61301                       | 2.06604                       | 1.99476                         |
| AMD1               | 1.5203                        | 1.96941                       | 1.72426                         |
| HSPA1A             | 1.83462                       | 2.01103                       | 1.93227                         |
| SYNGR3             | 1.60589                       | 1.96038                       | 1.85005                         |
| NINJ1              | 0.7598                        | 0.99127                       | 1.72971                         |
| SNRPA1             | 1.55278                       | 1.66008                       | 1.96275                         |
| TAF9               | 1.481                         | 1.65761                       | 1.76281                         |
| SYNCRIP            | 1.91962                       | 2.19583                       | 1.99841                         |
| n.a.               | 1.60636                       | 1.91587                       | 1.90396                         |
| ITGB3BP            | 1.64182                       | 2.14539                       | 1.77688                         |
| PTPRF              | 1.42956                       | 1.63305                       | 1.75224                         |
| CHEK1              | 1.53422                       | 2.10366                       | 1.87561                         |
| TCEB1              | 1.556                         | 1.776                         | 1.85982                         |
| n.a.               | 1.43656                       | 1.7346                        | 1.73058                         |
| VBP1               | 1.56579                       | 1.9559                        | 1.87104                         |
| BUB1B              | 1.6049                        | 1.9241                        | 1.96255                         |
| RACGAP1            | 1.73364                       | 2.05916                       | 1.88894                         |
| AK3                | 2.06656                       | 1.95104                       | 1.69952                         |
| HNRPF              | 1.59736                       | 1.81054                       | 1.91604                         |
| PDAP1              | 1.66448                       | 2.15136                       | 1.85385                         |
| SELE               | 1.24623                       | 1.68338                       | 1.66527                         |
| n.a.               | 1.68295                       | 1.93071                       | 1.97424                         |
| RCN1               | 2.06009                       | 2.16931                       | 2.63858                         |
| GLDC               | 1.41125                       | 1.31327                       | 2.34409                         |
| PMS1               | 1.08559                       | 1.89891                       | 2.13631                         |
| PFKP               | 1.41933                       | 1.62586                       | 1.70069                         |
| PDCD2              | 1.47801                       | 1.48647                       | 1.70576                         |
| MGST2              | 1.16869                       | 1.54234                       | 1.50267                         |
| NDUFB7             | 1.4699                        | 1.79464                       | 1.81315                         |
| G22P1              | 1.53247                       | 1.72329                       | 1.95877                         |
| n.a.               | 1.51863                       | 1.47004                       | 1.7866                          |
| PBEF1              | 1.33303                       | 1.15444                       | 1.5802                          |
| TBL2               | 1.40932                       | 1.67972                       | 1.67829                         |



| <b>HGNC Symbol</b> | <b>ratioDiff_3Tc vs 100Tc</b> | <b>ratioDiff_2Tc vs 100Tc</b> | <b>ratioDiff_1 5Tc vs 100Tc</b> |
|--------------------|-------------------------------|-------------------------------|---------------------------------|
| GCN5L2             | 1.37692                       | 1.62332                       | 1.6067                          |
| CDK2AP1            | 1.35068                       | 1.76676                       | 1.67184                         |
| NOL1               | 1.55408                       | 1.73149                       | 1.71902                         |
| SLC29A1            | 1.47715                       | 1.55412                       | 1.48343                         |
| BNIP1              | 1.34045                       | 1.82553                       | 1.59496                         |
| DBN1               | 1.34257                       | 1.71716                       | 1.92058                         |
| EIF4G1             | 1.59704                       | 1.73892                       | 1.96695                         |
| B4GALT2            | 1.49336                       | 1.92129                       | 1.68492                         |
| TMEM5              | 1.3202                        | 1.42458                       | 1.56542                         |
| FVT1               | 1.35657                       | 1.55874                       | 1.49288                         |
| ETF1               | 1.76494                       | 2.84583                       | 2.38456                         |
| ATF4               | 1.23206                       | 1.29648                       | 1.62725                         |
| ILF3               | 1.569                         | 1.92895                       | 1.80783                         |
| RAMP1              | 1.54661                       | 1.43014                       | 1.44015                         |
| n.a.               | 1.5583                        | 1.6439                        | 1.88072                         |
| ADCY3              | 1.25143                       | 1.56182                       | 1.74507                         |
| AFG3L2             | 1.41154                       | 1.53707                       | 1.89924                         |
| PRPS1              | 1.14059                       | 1.51571                       | 1.54713                         |
| OPRS1              | 1.88948                       | 1.83557                       | 2.21701                         |
| TOMM70A            | 1.89897                       | 1.9646                        | 1.96088                         |
| APRT               | 1.54865                       | 1.79082                       | 1.95745                         |
| FGFR4              | 1.11376                       | 1.0763                        | 1.30802                         |
| DEFA6              | 1.20942                       | 1.38198                       | 2.16191                         |
| ZNF9               | 1.95854                       | 2.63833                       | 2.77646                         |
| RAC3               | 2.32464                       | 1.88603                       | 3.33046                         |
| WNT10B             | 2.21465                       | 4.0642                        | 4.88812                         |
| NFRKB              | 1.60198                       | 1.54885                       | 1.52483                         |
| CDK5R2             | 0.9715                        | 1.06114                       | 1.43417                         |
| CYCS               | 2.62178                       | 3.84074                       | 3.58463                         |
| YES1               | 1.18168                       | 1.28812                       | 1.53605                         |
| DLEU1              | 1.32147                       | 1.62415                       | 1.80471                         |
| BNIP3              | 1.27468                       | 1.50986                       | 1.66027                         |
| RAD23A             | 1.44565                       | 1.60644                       | 1.69668                         |
|                    | 1.25844                       | 2.04729                       | 0.94385                         |
| UBE2G2             | 1.43482                       | 1.76835                       | 1.69219                         |
| KCNQ3              | 0.92554                       | 1.09792                       | 1.11777                         |
| MTA1               | 1.33323                       | 1.58378                       | 1.48892                         |
| LIG3               | 1.14078                       | 1.14682                       | 1.6073                          |
| ITGA2B             | 1.4994                        | 1.65331                       | 1.73939                         |
| TOMM34             | 1.50353                       | 1.94252                       | 1.59732                         |
| ITIH4              | 1.125                         | 1.51867                       | 1.82305                         |
| POLD1              | 1.5181                        | 1.52941                       | 1.68008                         |
| IKBKAP             | 1.29883                       | 1.49896                       | 1.27517                         |
| ASNS               | 1.12635                       | 1.14946                       | 1.50082                         |
| MX1                | 0.51808                       | 1.13956                       | 0.38581                         |
| XRCC5              | 2.09045                       | 2.31348                       | 2.18443                         |
| XPO1               | 1.44871                       | 1.68418                       | 1.59171                         |
| RAD54L             | 1.68088                       | 1.62496                       | 1.78545                         |
| PTHLH              | 0.43376                       | 0.3154                        | 0.05568                         |
| MSH2               | 1.90387                       | 1.90799                       | 1.93917                         |
| CDKL1              | 1.26031                       | 1.55079                       | 1.40044                         |
| ADA                | 1.35343                       | 1.44438                       | 1.62387                         |
| n.a.               | 1.12686                       | 1.28207                       | 1.40219                         |
| TGFB1              | 0.64508                       | 0.81684                       | 0.66545                         |
| NPTX2              | 0.62265                       | 0.66252                       | 0.1442                          |
| BAG1               | 1.33109                       | 1.38447                       | 1.48583                         |
| BAG1               | 1.17247                       | 1.32243                       | 1.44637                         |

| <b>HGNC Symbol</b> | <b>ratioDiff_3Tc vs 100Tc</b> | <b>ratioDiff_2Tc vs 100Tc</b> | <b>ratioDiff_1 5Tc vs 100Tc</b> |
|--------------------|-------------------------------|-------------------------------|---------------------------------|
| SHB                | 0.94802                       | 1.37482                       | 1.36243                         |
| EIF3S10            | 1.43497                       | 1.59215                       | 1.63039                         |
| HTATIP2            | 1.15159                       | 1.49081                       | 0.88688                         |
| CALCA              | 1.43684                       | 2.51202                       | 1.83745                         |
| C6orf108           | 1.4318                        | 1.56574                       | 1.61735                         |
| ACY1               | 1.49811                       | 1.06198                       | 1.57645                         |
| PASK               | 1.0524                        | 1.0316                        | 1.21096                         |
| CEBPZ              | 1.31128                       | 1.45701                       | 1.47952                         |
| RAP1A              | 0.88376                       | 1.09314                       | 1.1763                          |
| NID                | 2.40123                       | 1.21164                       | 1.80008                         |
| IDE                | 1.43872                       | 1.7147                        | 1.59449                         |
| HOXB7              | 1.01438                       | 1.04476                       | 0.78405                         |
| GUCY1B2            | 1.60775                       | 1.56864                       | 1.86421                         |
| SERPINA7           | 1.46628                       | 1.67917                       | 1.88827                         |
| FPRL2              | 1.23948                       | 1.36196                       | 1.3578                          |
| MTRR               | 1.11957                       | 1.36195                       | 1.29398                         |
| THRA               | 1.18024                       | 1.16                          | 1.46785                         |
| POR                | 1.17039                       | 1.1875                        | 1.73828                         |
| YWHAH              | 1.52887                       | 1.80174                       | 1.76687                         |
| TRIM28             | 1.49821                       | 1.56013                       | 1.80524                         |
| DHX30              | 1.31792                       | 1.52042                       | 1.69992                         |
| CDK8               | 1.49728                       | 1.55073                       | 1.62099                         |
| CCNH               | 1.26842                       | 1.32238                       | 1.41908                         |
| RFK                | 1.37716                       | 1.87081                       | 2.06224                         |
| RABGGTB            | 1.17809                       | 1.52625                       | 1.57306                         |
| PLK4               | 1.61233                       | 1.72317                       | 1.53458                         |
| CYP4B1             | 1.41241                       | 0.25675                       | 0.7211                          |
| TP53BP2            | 1.37046                       | 1.64057                       | 1.61474                         |
| NVL                | 1.28761                       | 1.59927                       | 1.6342                          |
| ARF1               | 1.25506                       | 1.29396                       | 1.51245                         |
| PLK2               | 0.63493                       | 0.67669                       | 0.5193                          |
| GZMA               | 2.01651                       | 1.69236                       | 1.79475                         |
| NOLA2              | 1.4335                        | 1.41897                       | 1.51016                         |
| HMBS               | 1.58312                       | 1.69048                       | 1.93167                         |
| ITIH2              | 1.00829                       | 1.08656                       | 1.40847                         |
| SACS               | 0.82328                       | 0.95062                       | 1.27284                         |
| GABPA              | 1.53504                       | 1.89061                       | 1.95039                         |
| ETS2               | 1.16747                       | 1.41531                       | 1.18718                         |
| IL8RA              | 1.22945                       | 1.42727                       | 1.64043                         |
| API5               | 2.17643                       | 2.78404                       | 2.7498                          |
| n.a.               | 1.19458                       | 1.34948                       | 1.43581                         |
| ICT1               | 1.43444                       | 1.8585                        | 1.83986                         |
| DFFB               | 1.07017                       | 1.25286                       | 1.28066                         |
| USP7               | 1.11755                       | 1.33793                       | 1.38624                         |
| PAP                | 1.16816                       | 1.5484                        | 1.58784                         |
| BSG                | 1.06042                       | 1.20233                       | 1.4945                          |
| YIF1               | 1.37672                       | 1.38607                       | 1.66112                         |
| POLE               | 1.60146                       | 1.81813                       | 1.98996                         |
|                    | 1.44818                       | 1.54321                       | 1.95893                         |

| <b>HGNC Symbol</b> | <b>ratioDiff_1Tc vs 100Tc</b> | <b>ratioDiff_0 5Tc vs 100Tc</b> | <b>ratioDiff_0Tc vs 100Tc</b> |
|--------------------|-------------------------------|---------------------------------|-------------------------------|
| MYC                | 42.55956                      | 61.70016                        | 87.2543                       |
| CACNA1G            | 4.10357                       | 6.3119                          | 8.40158                       |
| NME1               | 12.65542                      | 14.61954                        | 17.96404                      |
| ADCY2              | 3.12449                       | 2.66786                         | 5.3241                        |
| C4orf9             | 3.37662                       | 3.7349                          | 4.01786                       |
| FKBP5              | 9.78958                       | 11.42233                        | 11.98342                      |
| CRKL               | 5.17794                       | 6.20751                         | 5.98053                       |
| RFC5               | 21.45423                      | 18.44407                        | 18.12116                      |
| PPP2CA             | 11.25789                      | 16.51385                        | 22.38685                      |
| TIMM8A             | 5.63313                       | 5.12545                         | 3.8733                        |
| n.a.               | 9.50067                       | 7.22699                         | 7.64863                       |
| MAD2L1             | 22.08802                      | 22.70379                        | 19.9753                       |
| MRPL12             | 4.05368                       | 4.95686                         | 4.80397                       |
| NME1               | 11.13922                      | 12.14102                        | 16.09313                      |
| METTL1             | 4.96488                       | 6.3203                          | 7.57916                       |
| SLC7A5             | 8.45513                       | 11.33701                        | 18.69516                      |
| SRM                | 7.76917                       | 9.92205                         | 10.99592                      |
| IL1B               | 3.33098                       | 3.80349                         | 4.04879                       |
| PAICS              | 10.14723                      | 11.5871                         | 12.46339                      |
| TOMM40             | 5.06835                       | 5.95614                         | 7.63457                       |
| PYCR1              | 10.54797                      | 14.22591                        | 20.6756                       |
| UMPK               | 3.74271                       | 4.48048                         | 4.79269                       |
| LRP8               | 5.07592                       | 5.03899                         | 5.91824                       |
| DUSP14             | 4.07593                       | 4.50861                         | 5.75267                       |
| METAP1             | 4.40334                       | 4.12686                         | 3.93035                       |
| ABCE1              | 4.64929                       | 4.99496                         | 6.79621                       |
| PA2G4              | 6.10337                       | 7.34251                         | 7.60621                       |
| BOP1               | 4.46313                       | 5.69714                         | 6.76932                       |
| RANBP1             | 6.1002                        | 6.72988                         | 7.87789                       |
| CTPS               | 4.88121                       | 5.31886                         | 5.92513                       |
| TRAP1              | 8.67284                       | 10.7689                         | 13.92644                      |
| HSPD1              | 8.50328                       | 10.41076                        | 11.85225                      |
| PFAS               | 5.90896                       | 6.46556                         | 6.19095                       |
| TEAD4              | 5.93397                       | 7.63018                         | 9.67222                       |
| MIF                | 3.78125                       | 3.89994                         | 5.11409                       |
| VAR2               | 4.3718                        | 5.55623                         | 6.38357                       |
| CENTG1             | 7.99525                       | 9.57574                         | 13.05877                      |
| DSCR2              | 6.87953                       | 8.24313                         | 9.64521                       |
| JAG2               | 6.39893                       | 7.51493                         | 9.51248                       |
| PRKAR1B            | 3.81095                       | 4.63422                         | 4.71128                       |
| n.a.               | 3.77528                       | 4.29986                         | 5.4231                        |
| MATK               | 6.17682                       | 7.30694                         | 7.93624                       |
| IARS               | 4.08365                       | 5.12234                         | 6.07415                       |
| GAL                | 9.25781                       | 12.62613                        | 16.02949                      |
| MCAM               | 5.43696                       | 4.44095                         | 7.88416                       |
| CAD                | 4.11547                       | 5.68639                         | 6.2572                        |
| FH                 | 5.16085                       | 5.88788                         | 6.1659                        |
| SRPK1              | 5.88368                       | 6.22625                         | 7.96465                       |
| NEFH               | 51.35556                      | 47.78841                        | 37.6185                       |
| NP                 | 4.53701                       | 5.11245                         | 6.1202                        |
| AHCY               | 5.45996                       | 5.74862                         | 7.26408                       |
| POLD2              | 3.66692                       | 4.06559                         | 5.12376                       |
| C1QBP              | 5.28119                       | 6.08349                         | 6.8464                        |
| CAMKK2             | 5.05363                       | 5.58444                         | 5.50539                       |
| n.a.               | 4.89528                       | 5.33063                         | 5.99164                       |
| BYSL               | 3.25353                       | 3.75738                         | 4.18224                       |
| NUP155             | 2.91755                       | 3.16489                         | 3.45813                       |

| HGNC Symbol | ratioDiff_1Tc vs 100Tc | ratioDiff_0 5Tc vs 100Tc | ratioDiff_0Tc vs 100Tc |
|-------------|------------------------|--------------------------|------------------------|
| IFRD2       | 6.97507                | 8.90679                  | 10.31138               |
| MRPL3       | 5.81345                | 6.35628                  | 7.08892                |
| HSPE1       | 6.45011                | 7.25866                  | 8.54071                |
| HSPE1       | 6.05208                | 7.05795                  | 7.6957                 |
| n.a.        | 4.05807                | 4.39638                  | 4.86893                |
| EBNA1BP2    | 5.13769                | 5.37035                  | 6.73213                |
| TNFRSF8     | 12.17168               | 15.70198                 | 24.75813               |
| PRDX4       | 6.0683                 | 7.10777                  | 8.69138                |
| CSE1L       | 5.98972                | 6.24911                  | 7.8576                 |
| RPP40       | 5.12628                | 5.10119                  | 7.10827                |
| n.a.        | 5.6546                 | 6.54545                  | 6.72008                |
| HRMT1L2     | 4.36018                | 6.13504                  | 6.92114                |
| n.a.        | 2.22142                | 3.79878                  | 5.85442                |
| n.a.        | 5.10289                | 6.2327                   | 7.61093                |
| MADH4       | 5.18027                | 5.7891                   | 6.2482                 |
| IL9         | 3.79467                | 3.89917                  | 4.04968                |
| PDCD11      | 2.93079                | 3.62611                  | 4.39651                |
| HK2         | 4.56867                | 5.595                    | 5.11866                |
| PWP2H       | 3.37525                | 4.37841                  | 4.55456                |
| n.a.        | 7.74379                | 7.31666                  | 8.54731                |
| NOLC1       | 5.81309                | 6.48608                  | 7.15331                |
| NOLC1       | 4.23015                | 4.94352                  | 6.29532                |
| CCT2        | 4.34853                | 4.80487                  | 5.34596                |
| DTYMK       | 3.48797                | 3.98954                  | 4.13029                |
| HNRPAB      | 4.2107                 | 4.86906                  | 5.04736                |
| FASN        | 9.42903                | 12.29211                 | 15.74478               |
| FASN        | 5.96045                | 7.82376                  | 10.59142               |
| NMB         | 3.08516                | 3.64827                  | 3.45723                |
| CHC1        | 4.6726                 | 5.77466                  | 5.71765                |
|             | 6.69718                | 7.99568                  | 8.69962                |
| KIAA0179    | 4.0559                 | 4.23454                  | 7.16147                |
| NTHL1       | 3.96675                | 4.62964                  | 5.415                  |
| UNG         | 5.09676                | 5.90432                  | 6.29802                |
| KIAA0020    | 4.23861                | 4.55516                  | 5.54856                |
| n.a.        | 3.26672                | 3.37693                  | 4.47474                |
| n.a.        | 3.56795                | 4.08401                  | 4.57245                |
| POLE2       | 3.53942                | 3.65389                  | 4.70149                |
| MTHFD1      | 3.40318                | 3.77155                  | 3.97735                |
| NOL5A       | 4.0127                 | 4.13728                  | 5.35134                |
| PRPS2       | 4.19954                | 4.61977                  | 5.29812                |
| RUVBL2      | 3.85889                | 4.08958                  | 4.58245                |
| GPI         | 3.39492                | 3.93178                  | 4.57534                |
| n.a.        | 3.75454                | 4.32384                  | 4.30478                |
| NPM3        | 5.63011                | 7.46509                  | 8.41908                |
| n.a.        | 5.93825                | 6.85478                  | 8.48588                |
| CDC20       | 3.22934                | 3.23128                  | 3.48935                |
| n.a.        | 4.05137                | 4.85003                  | 5.1328                 |
| PRKDC       | 3.33136                | 3.05039                  | 3.5464                 |
| CKS2        | 3.61249                | 3.42897                  | 3.8564                 |
| CSE1L       | 4.2137                 | 5.52823                  | 6.58006                |
| EEF1E1      | 5.05568                | 5.83235                  | 6.66591                |
| HRMT1L2     | 4.53008                | 5.29093                  | 6.20834                |
| n.a.        | 3.6842                 | 4.13598                  | 4.56806                |
| TST         | 3.01959                | 3.76553                  | 3.61984                |
| DKC1        | 3.8259                 | 4.19661                  | 4.69489                |
| RAN         | 3.45009                | 3.32415                  | 3.5811                 |
| PDGFRA      | 7.00185                | 7.50938                  | 12.48374               |

| <b>HGNC Symbol</b> | <b>ratioDiff_1Tc vs 100Tc</b> | <b>ratioDiff_0 5Tc vs 100Tc</b> | <b>ratioDiff_0Tc vs 100Tc</b> |
|--------------------|-------------------------------|---------------------------------|-------------------------------|
| CDK4               | 3.14164                       | 7.8463                          | 10.85495                      |
| ALDH1B1            | 3.26482                       | 3.60919                         | 3.45183                       |
| SORD               | 4.42329                       | 5.5685                          | 6.53145                       |
| BDH                | 3.33788                       | 3.31949                         | 3.43358                       |
| GMPS               | 3.44961                       | 3.61628                         | 3.39589                       |
| GPR30              | 4.68597                       | 6.03741                         | 6.94378                       |
| PHB                | 4.27309                       | 4.67398                         | 4.78849                       |
| STRA13             | 4.56474                       | 5.36788                         | 5.97681                       |
| XPOT               | 4.89194                       | 4.95985                         | 6.10057                       |
| SMN1               | 2.84982                       | 3.4874                          | 3.97206                       |
| CHC1               | 4.20229                       | 4.99297                         | 4.87651                       |
| PLK1               | 4.37765                       | 5.50917                         | 4.90759                       |
| n.a.               | 4.67172                       | 5.61973                         | 6.78752                       |
| AK2                | 3.42662                       | 3.81534                         | 4.68601                       |
| n.a.               | 3.17558                       | 3.36099                         | 4.35299                       |
| MGST1              | 3.90251                       | 4.525                           | 6.11094                       |
| CSDA               | 3.02137                       | 3.50232                         | 4.20475                       |
| n.a.               | 3.23947                       | 3.77981                         | 4.96559                       |
| ATP1B3             | 3.07938                       | 3.55716                         | 3.82131                       |
| BCS1L              | 3.39876                       | 4.11329                         | 4.75064                       |
| UNG                | 3.94301                       | 4.44875                         | 6.20913                       |
| PBP                | 3.03254                       | 3.52436                         | 2.99671                       |
| CDC6               | 3.9416                        | 4.41847                         | 4.17811                       |
| CDC7               | 3.43513                       | 3.83948                         | 3.716                         |
| MTAP               | 3.59547                       | 3.94082                         | 4.02843                       |
| ADSL               | 3.19411                       | 3.67234                         | 3.90437                       |
| CDKN3              | 3.54552                       | 3.80539                         | 3.88604                       |
| VRK1               | 2.58006                       | 3.02842                         | 2.81075                       |
| WFDC2              | 3.59872                       | 3.70886                         | 4.66488                       |
| GSPT1              | 2.86741                       | 3.11077                         | 3.40794                       |
| SLC39A14           | 5.38773                       | 5.98195                         | 8.32828                       |
| n.a.               | 3.45094                       | 4.3423                          | 5.21027                       |
| RLN2               | 2.32137                       | 2.95401                         | 3.63672                       |
| BAG2               | 2.50986                       | 2.74883                         | 3.4578                        |
| HSD17B8            | 3.35422                       | 4.45612                         | 5.50266                       |
| UCHL3              | 3.22446                       | 3.88522                         | 3.86965                       |
| NME2               | 3.10485                       | 3.64699                         | 3.66958                       |
| MRPS12             | 2.72984                       | 3.02598                         | 3.26639                       |
| PCNA               | 2.8697                        | 2.66505                         | 3.01777                       |
| DPH2L2             | 3.49658                       | 4.04596                         | 4.858                         |
| CCNB1              | 3.34435                       | 3.3341                          | 3.49195                       |
| MC1R               | 4.61441                       | 5.65785                         | 6.88885                       |
| SOD1               | 3.23678                       | 3.74546                         | 4.08886                       |
| ATP5G3             | 3.19433                       | 3.33559                         | 3.22191                       |
| CCT3               | 2.90333                       | 3.13124                         | 3.43273                       |
| RFC4               | 3.3877                        | 3.4775                          | 4.07296                       |
| CDC25A             | 3.00332                       | 3.30828                         | 3.68558                       |
| FRDA               | 3.45462                       | 3.79875                         | 4.26683                       |
| SNRPD1             | 2.49215                       | 3.07422                         | 3.43912                       |
| CHAF1A             | 2.50939                       | 2.77248                         | 3.04709                       |
| PRDX2              | 3.29341                       | 3.79516                         | 4.42731                       |
| BUB1               | 2.92046                       | 2.99785                         | 2.88227                       |
| CDC2               | 3.08611                       | 2.81643                         | 2.11441                       |
| POLR1C             | 2.86722                       | 2.97472                         | 3.93541                       |
| SLC19A1            | 3.27889                       | 3.72518                         | 3.88466                       |
| TOMM20             | 3.13807                       | 4.07067                         | 4.80403                       |
| MMP3               | 3.39477                       | 3.86957                         | 4.60307                       |

| <b>HGNC Symbol</b> | <b>ratioDiff_1Tc vs 100Tc</b> | <b>ratioDiff_0 5Tc vs 100Tc</b> | <b>ratioDiff_0Tc vs 100Tc</b> |
|--------------------|-------------------------------|---------------------------------|-------------------------------|
| UBE2C              | 3.03537                       | 3.04107                         | 3.27422                       |
| PTPN2              | 4.28245                       | 5.8698                          | 7.90338                       |
| RUVBL1             | 3.4574                        | 3.62206                         | 4.4895                        |
| TYMS               | 2.65722                       | 2.47974                         | 2.61263                       |
| DDX10              | 3.11147                       | 3.60279                         | 4.32251                       |
| TUFM               | 3.02627                       | 3.21677                         | 4.08699                       |
| AURKB              | 2.58118                       | 2.6182                          | 3.10905                       |
| RRS1               | 3.58031                       | 3.6395                          | 4.33429                       |
| GEMIN4             | 2.83237                       | 3.12387                         | 3.60669                       |
| PTMA               | 3.19486                       | 3.70007                         | 3.46455                       |
| CYP51A1            | 3.29189                       | 3.89596                         | 5.39441                       |
| ARHGEF5            | 5.04372                       | 7.33883                         | 6.81309                       |
| KIAA0690           | 3.20898                       | 3.73572                         | 4.86181                       |
| VDAC1              | 2.94232                       | 3.4234                          | 3.8747                        |
| DDX1               | 2.90741                       | 3.3595                          | 3.31665                       |
| SCAMP1             | 2.24616                       | 2.73019                         | 2.78406                       |
| DDX18              | 2.86706                       | 2.84874                         | 3.38371                       |
| PES1               | 2.75486                       | 3.40684                         | 3.81137                       |
| RANGAP1            | 2.87308                       | 2.86838                         | 3.32081                       |
| APEX1              | 2.4864                        | 2.67292                         | 3.14228                       |
| MYBL2              | 3.039                         | 3.46259                         | 3.1865                        |
| USP10              | 2.68116                       | 2.61077                         | 2.77824                       |
| n.a.               | 2.58438                       | 2.88128                         | 3.13738                       |
| RPA3               | 2.4983                        | 2.50235                         | 2.98915                       |
| CXCL12             | 2.48943                       | 2.71107                         | 3.0859                        |
| n.a.               | 2.85736                       | 3.18002                         | 4.52962                       |
| MCM3               | 3.16556                       | 4.71474                         | 5.36383                       |
| GMNN               | 2.30297                       | 2.54958                         | 3.0563                        |
| HSPA9B             | 3.09991                       | 3.06831                         | 3.12303                       |
| TCERG1             | 2.44073                       | 2.71768                         | 2.65569                       |
| RNU3IP2            | 2.96337                       | 3.97149                         | 4.98986                       |
| SFRS7              | 2.51243                       | 2.4568                          | 2.60276                       |
| MSH6               | 2.95288                       | 2.93276                         | 3.6924                        |
| CENPF              | 2.27301                       | 2.24101                         | 2.62182                       |
| MXI1               | 2.42274                       | 2.84671                         | 2.77717                       |
| AMD1               | 3.12782                       | 3.0286                          | 3.29496                       |
| ELK1               | 2.57974                       | 2.75663                         | 3.21652                       |
| ILF3               | 2.58064                       | 3.33287                         | 3.5075                        |
| TFDP1              | 2.56869                       | 2.3599                          | 2.11254                       |
| n.a.               | 2.89697                       | 2.68215                         | 3.01261                       |
| TOP2A              | 2.64039                       | 2.36501                         | 2.01929                       |
| EIF5A              | 2.53638                       | 2.25526                         | 2.38186                       |
| n.a.               | 2.91693                       | 3.61117                         | 4.56836                       |
| n.a.               | 2.76538                       | 3.03843                         | 3.40013                       |
| ATIC               | 3.01641                       | 3.27294                         | 3.76506                       |
| ATIC               | 2.53944                       | 2.46581                         | 2.68238                       |
| PEX5               | 2.96819                       | 2.93627                         | 4.34525                       |
| TAF4B              | 2.58881                       | 2.60088                         | 2.76189                       |
| HDGF               | 2.44038                       | 3.06291                         | 3.57493                       |
| HDGF               | 2.79845                       | 3.3779                          | 3.3949                        |
| ILF2               | 2.4026                        | 2.31204                         | 2.53093                       |
| CCNA2              | 2.61863                       | 2.17888                         | 2.17448                       |
| MDH2               | 3.04362                       | 3.67645                         | 4.09346                       |
| PEG10              | 3.36856                       | 4.51214                         | 8.13611                       |
| PPRC1              | 3.13069                       | 3.58351                         | 4.16674                       |
| SSRP1              | 2.75375                       | 3.18396                         | 3.65571                       |
| PTK9               | 17.9661                       | 40.6391                         | 46.43332                      |

| <b>HGNC Symbol</b> | <b>ratioDiff_1Tc vs 100Tc</b> | <b>ratioDiff_0 5Tc vs 100Tc</b> | <b>ratioDiff_0Tc vs 100Tc</b> |
|--------------------|-------------------------------|---------------------------------|-------------------------------|
| ACSL1              | 3.82401                       | 4.20253                         | 5.11831                       |
| PFKM               | 3.33415                       | 4.05675                         | 5.36111                       |
| HNRPDL             | 2.40166                       | 2.37392                         | 2.90982                       |
| RPIA               | 3.10379                       | 3.31655                         | 4.24014                       |
| SLC16A1            | 2.395                         | 5.41817                         | 5.66308                       |
| KCNJ6              | 2.34355                       | 2.47237                         | 2.70192                       |
| SFRS2              | 2.37024                       | 2.78461                         | 2.87238                       |
| PRKCI              | 3.99947                       | 4.17585                         | 4.12576                       |
| POLR2H             | 2.6848                        | 2.76369                         | 3.78647                       |
| ABCE1              | 2.43505                       | 2.39152                         | 3.06277                       |
| MELK               | 2.2525                        | 2.0913                          | 2.42966                       |
| DDX21              | 2.14047                       | 2.94047                         | 4.46449                       |
| SSSCA1             | 2.47409                       | 2.60138                         | 2.9706                        |
| n.a.               | 2.76305                       | 2.91814                         | 3.68001                       |
| HSPCA              | 2.29792                       | 2.15057                         | 2.25279                       |
| DEAF1              | 2.65433                       | 3.1304                          | 3.97091                       |
| n.a.               | 3.25924                       | 4.11289                         | 5.74854                       |
| EIF1AX             | 3.16383                       | 2.81899                         | 3.62597                       |
| n.a.               | 2.80236                       | 3.13596                         | 4.09026                       |
| n.a.               | 2.4932                        | 2.5794                          | 2.75322                       |
| SF3A3              | 2.72055                       | 2.73358                         | 2.75006                       |
| n.a.               | 2.33998                       | 2.60733                         | 3.67897                       |
| AK2                | 2.07205                       | 2.47743                         | 2.32938                       |
| PLAUR              | 2.00149                       | 5.077                           | 4.13651                       |
| SCARB1             | 2.33704                       | 3.13243                         | 3.26626                       |
| MCM2               | 2.00686                       | 2.33583                         | 2.48666                       |
| EXOSC7             | 2.43804                       | 2.81959                         | 2.77967                       |
| KHSRP              | 2.46717                       | 2.71192                         | 2.87402                       |
| NUDC               | 2.08878                       | 2.47941                         | 2.71591                       |
| CGRRF1             | 2.46383                       | 2.87671                         | 3.04495                       |
| APEX1              | 2.31787                       | 2.40803                         | 2.87503                       |
| GARS               | 2.63679                       | 2.90124                         | 3.58124                       |
| EIF3S9             | 2.42211                       | 2.61943                         | 3.05344                       |
| IMPDH1             | 2.13935                       | 2.35305                         | 3.16127                       |
| VEGF               | 3.10277                       | 3.34944                         | 7.00747                       |
| TFDP2              | 2.44544                       | 3.01612                         | 3.38846                       |
| PRDX1              | 2.28505                       | 2.38325                         | 2.63213                       |
| SCO2               | 2.24647                       | 2.2319                          | 2.13269                       |
| TUBG1              | 2.49799                       | 2.59029                         | 3.21643                       |
| MYCN               | 2.27004                       | 2.53736                         | 3.14659                       |
| ABL2               | 2.97884                       | 2.85068                         | 3.75771                       |
| SLC20A1            | 2.10106                       | 2.39641                         | 2.43014                       |
| CDKN2B             | 2.42227                       | 3.01018                         | 3.26388                       |
| n.a.               | 2.34068                       | 2.75513                         | 3.03272                       |
| FANCG              | 2.24945                       | 2.40791                         | 2.62456                       |
| PMPCA              | 2.138                         | 2.44032                         | 2.81063                       |
| PSMC3              | 2.03595                       | 2.28076                         | 2.29805                       |
| MCM7               | 2.00869                       | 2.29669                         | 2.50078                       |
| ABCA3              | 2.28794                       | 3.27194                         | 4.05195                       |
| EIF4EBP1           | 2.24692                       | 2.50195                         | 3.17964                       |
| TNFRSF4            | 2.34863                       | 2.95533                         | 3.30479                       |
| SRP72              | 2.09652                       | 2.28961                         | 2.38668                       |
| ALG3               | 2.08552                       | 2.32703                         | 3.09045                       |
| CKS1B              | 2.37541                       | 2.65577                         | 2.87021                       |
| NSEP1              | 2.30786                       | 2.18322                         | 2.29475                       |
| FARSLA             | 2.13637                       | 2.7354                          | 2.38551                       |
| PRIM1              | 2.34305                       | 2.49709                         | 2.30926                       |

| HGNC Symbol | ratioDiff_1Tc vs 100Tc | ratioDiff_0 5Tc vs 100Tc | ratioDiff_0Tc vs 100Tc |
|-------------|------------------------|--------------------------|------------------------|
| TBL3        | 2.12114                | 2.22305                  | 2.54996                |
| JUND        | 2.19603                | 2.35626                  | 2.45988                |
| PTBP1       | 2.10288                | 2.23436                  | 2.40669                |
| MRE11A      | 2.10988                | 2.0012                   | 2.26884                |
| HSPA5       | 2.17778                | 2.17846                  | 2.12109                |
| OAT         | 2.2997                 | 2.56202                  | 2.56884                |
| TFRC        | 2.00211                | 2.01432                  | 2.32121                |
| SHMT1       | 2.08243                | 2.59617                  | 2.78876                |
| CLNS1A      | 2.23441                | 2.25281                  | 2.66778                |
| SEMA3C      | 2.75925                | 3.05475                  | 4.09492                |
| MCAM        | 2.38139                | 2.52941                  | 3.00442                |
| MAPKAPK5    | 2.00687                | 2.25608                  | 2.34269                |
| SIP1        | 2.35874                | 2.45948                  | 3.00766                |
| NF2         | 2.20512                | 2.15203                  | 2.29737                |
| SLC1A5      | 2.26812                | 2.51159                  | 3.81948                |
| PSMA2       | 2.02182                | 2.21533                  | 2.36574                |
| RAD51C      | 2.01237                | 2.31669                  | 2.06484                |
| CTSC        | 2.09898                | 2.18691                  | 2.75012                |
| HSPA8       | 2.55568                | 2.37367                  | 2.63081                |
| n.a.        | 2.06934                | 2.29935                  | 2.38391                |
| IGFBP2      | 2.68317                | 3.70784                  | 4.15456                |
| DARS        | 2.04423                | 2.27549                  | 2.80422                |
| UCHL3       | 2.42562                | 2.54005                  | 3.0887                 |
| GTF3A       | 2.03682                | 2.18373                  | 2.45271                |
| RPL5        | 2.07825                | 2.01389                  | 2.49848                |
| AMD1        | 2.54805                | 2.17837                  | 2.71465                |
| HSPA1A      | 2.23857                | 2.10131                  | 2.47026                |
| SYNGR3      | 2.7029                 | 3.38976                  | 4.36192                |
| NINJ1       | 2.5549                 | 3.35698                  | 4.70439                |
| SNRPA1      | 2.179                  | 2.25245                  | 2.48261                |
| TAF9        | 2.08443                | 2.12874                  | 2.13455                |
| SYNCRIP     | 2.16904                | 2.69458                  | 2.55817                |
| n.a.        | 2.18487                | 2.5438                   | 2.80921                |
| ITGB3BP     | 2.15417                | 2.07467                  | 2.65332                |
| PTPRF       | 2.04696                | 3.07111                  | 3.5114                 |
| CHEK1       | 2.19603                | 2.2159                   | 2.04195                |
| TCEB1       | 2.34188                | 2.45703                  | 2.49718                |
| n.a.        | 2.12772                | 2.00923                  | 2.42507                |
| VBP1        | 2.06351                | 2.2361                   | 2.29782                |
| BUB1B       | 2.47283                | 2.8594                   | 3.10059                |
| RACGAP1     | 2.14886                | 2.13781                  | 2.26063                |
| AK3         | 2.35488                | 3.01216                  | 3.00224                |
| HNRPF       | 2.00084                | 2.09886                  | 2.2827                 |
| PDAP1       | 2.60091                | 2.68426                  | 2.47501                |
| SELE        | 1.76465                | 2.03393                  | 2.03114                |
| n.a.        | 1.99734                | 2.60169                  | 2.5236                 |
| RCN1        | 0.17523                | 2.58736                  | 3.12291                |
| GLDC        | 1.91757                | 2.19872                  | 2.47885                |
| PMS1        | 1.54878                | 2.27122                  | 2.15604                |
| PFKP        | 1.92083                | 2.39259                  | 2.33567                |
| PDCD2       | 1.70822                | 2.03668                  | 2.15808                |
| MGST2       | 1.6855                 | 2.06148                  | 2.29762                |
| NDUFB7      | 1.97                   | 2.14669                  | 2.30556                |
| G22P1       | 1.99051                | 2.03141                  | 2.30922                |
| n.a.        | 1.84628                | 2.09751                  | 2.47187                |
| PBEF1       | 1.34258                | 2.03608                  | 2.23494                |
| TBL2        | 1.90188                | 2.1786                   | 2.24235                |



| HGNC Symbol | ratioDiff_1Tc vs 100Tc | ratioDiff_0 5Tc vs 100Tc | ratioDiff_0Tc vs 100Tc |
|-------------|------------------------|--------------------------|------------------------|
| GCN5L2      | 1.24358                | 2.29638                  | 2.26522                |
| CDK2AP1     | 1.92764                | 2.36413                  | 2.75525                |
| NOL1        | 1.98243                | 2.12644                  | 2.73116                |
| SLC29A1     | 1.87925                | 2.01848                  | 2.20564                |
| BNIP1       | 1.75553                | 2.24189                  | 2.04478                |
| DBN1        | 1.54869                | 2.4275                   | 2.94763                |
| EIF4G1      | 1.98744                | 2.36364                  | 2.50655                |
| B4GALT2     | 1.10763                | 2.49573                  | 2.99692                |
| TMEM5       | 1.77509                | 2.03239                  | 2.23446                |
| FVT1        | 1.66279                | 2.8837                   | 3.88861                |
| ETF1        | 1.48537                | 2.62282                  | 3.42267                |
| ATF4        | 1.66561                | 2.04373                  | 2.37346                |
| ILF3        | 1.76678                | 2.19128                  | 2.5045                 |
| RAMP1       | 1.73581                | 2.44218                  | 2.57713                |
| n.a.        | 1.94067                | 2.19141                  | 2.39246                |
| ADCY3       | 1.8449                 | 2.3599                   | 3.01733                |
| AFG3L2      | 1.93965                | 2.23644                  | 2.53436                |
| PRPS1       | 1.66392                | 2.00555                  | 2.48746                |
| OPRS1       | 1.58171                | 3.16209                  | 4.05827                |
| TOMM70A     | 1.85241                | 2.42402                  | 3.42677                |
| APRT        | 1.84727                | 2.25601                  | 2.12414                |
| FGFR4       | 1.59993                | 2.31677                  | 3.26111                |
| DEFA6       | 1.83428                | 2.90574                  | 2.60167                |
| ZNF9        | 1.62604                | 2.28333                  | 3.00708                |
| RAC3        | 0.25238                | 3.81293                  | 5.49261                |
| WNT10B      | 1.98001                | 4.53153                  | 6.2122                 |
| NFRKB       | 1.7787                 | 2.51335                  | 2.62413                |
| CDK5R2      | 1.63492                | 2.32141                  | 2.51195                |
| CYCS        | 0.547                  | 4.24049                  | 5.17051                |
| YES1        | 1.97717                | 2.70757                  | 3.14159                |
| DLEU1       | 1.97516                | 2.12475                  | 2.34238                |
| BNIP3       | 1.92427                | 2.36297                  | 2.97966                |
| RAD23A      | 1.93086                | 2.08553                  | 2.30461                |
|             | 1.74536                | 2.1401                   | 2.27126                |
| UBE2G2      | 1.90597                | 1.84827                  | 2.34154                |
| KCNQ3       | 1.3443                 | 1.07219                  | 2.15838                |
| MTA1        | 1.81367                | 1.87632                  | 2.25746                |
| LIG3        | 1.50686                | 1.89846                  | 2.28307                |
| ITGA2B      | 1.84054                | 1.99881                  | 2.56326                |
| TOMM34      | 1.34485                | 1.46227                  | 2.00106                |
| ITIH4       | 1.74286                | 1.69042                  | 2.73182                |
| POLD1       | 1.72163                | 1.85457                  | 2.18547                |
| IKBKAP      | 1.66509                | 1.59204                  | 2.23281                |
| ASNS        | 1.40134                | 1.64749                  | 2.2332                 |
| MX1         | 0.98617                | 0.69956                  | 3.82523                |
| XRCC5       | 2.00243                | 1.93514                  | 2.26803                |
| XPO1        | 1.71726                | 1.75515                  | 2.02546                |
| RAD54L      | 1.92601                | 1.85774                  | 2.0831                 |
| PTHLH       | 1.49946                | 0.5356                   | 3.68779                |
| MSH2        | 1.96053                | 1.98553                  | 2.15761                |
| CDKL1       | 1.82786                | 1.62387                  | 2.12672                |
| ADA         | 1.73706                | 1.9483                   | 2.51644                |
| n.a.        | 1.51007                | 1.6771                   | 2.17437                |
| TGFB1       | 0.96478                | 0.53068                  | 26.38897               |
| NPTX2       | 0.63812                | 0.61151                  | 5.99783                |
| BAG1        | 1.62322                | 1.59474                  | 2.076                  |
| BAG1        | 1.49589                | 1.52093                  | 2.02536                |

| <b>HGNC Symbol</b> | <b>ratioDiff_1Tc vs 100Tc</b> | <b>ratioDiff_0 5Tc vs 100Tc</b> | <b>ratioDiff_0Tc vs 100Tc</b> |
|--------------------|-------------------------------|---------------------------------|-------------------------------|
| SHB                | 1.46152                       | 1.933                           | 2.008                         |
| EIF3S10            | 1.76727                       | 1.8097                          | 2.01006                       |
| HTATIP2            | 1.3001                        | 1.25372                         | 2.46993                       |
| CALCA              | 1.46495                       | 1.85066                         | 2.32848                       |
| C6orf108           | 1.71032                       | 1.75957                         | 2.0432                        |
| ACY1               | 1.43372                       | 1.67146                         | 2.09794                       |
| PASK               | 1.23392                       | 1.76769                         | 2.07185                       |
| CEBPZ              | 1.77124                       | 1.73182                         | 2.13946                       |
| RAP1A              | 1.44352                       | 1.71952                         | 2.14292                       |
| NID                | 1.2512                        | 1.06807                         | 3.42032                       |
| IDE                | 2.043                         | 1.9388                          | 2.34453                       |
| HOXB7              | 0.92105                       | 0.63728                         | 3.38063                       |
| GUCY1B2            | 1.66455                       | 1.9234                          | 2.31464                       |
| SERPINA7           | 1.87012                       | 1.98896                         | 2.59359                       |
| FPRL2              | 1.47086                       | 1.52147                         | 2.00635                       |
| MTRR               | 1.52986                       | 1.67138                         | 2.08267                       |
| THRA               | 1.45482                       | 1.808                           | 2.2475                        |
| POR                | 1.56192                       | 1.93125                         | 2.08338                       |
| YWHAH              | 1.88426                       | 1.7047                          | 2.00634                       |
| TRIM28             | 1.85181                       | 1.94295                         | 2.2735                        |
| DHX30              | 1.83512                       | 1.81065                         | 2.22894                       |
| CDK8               | 2.45068                       | 1.93096                         | 2.17855                       |
| CCNH               | 1.41922                       | 1.62185                         | 2.00283                       |
| RFK                | 2.02827                       | 1.99729                         | 2.60186                       |
| RABGGTB            | 1.64906                       | 1.94136                         | 2.04018                       |
| PLK4               | 1.76239                       | 1.76554                         | 2.62038                       |
| CYP4B1             | 0.72928                       | 0.85251                         | 2.77588                       |
| TP53BP2            | 1.52489                       | 1.85311                         | 2.4665                        |
| NVL                | 1.7623                        | 1.92322                         | 2.50029                       |
| ARF1               | 1.53188                       | 1.72703                         | 2.00703                       |
| PLK2               | 0.65117                       | 0.64504                         | 2.26671                       |
| GZMA               | 1.16987                       | 1.1414                          | 2.66388                       |
| NOLA2              | 1.56083                       | 1.86499                         | 2.51595                       |
| HMBS               | 2.10447                       | 1.96718                         | 2.59794                       |
| ITIH2              | 1.02004                       | 0.4869                          | 3.02975                       |
| SACS               | 1.33404                       | 1.27125                         | 2.2351                        |
| GABPA              | 1.89262                       | 1.96747                         | 2.23562                       |
| ETS2               | 1.48816                       | 1.68684                         | 2.05107                       |
| IL8RA              | 1.61113                       | 1.76378                         | 2.04316                       |
| API5               | 1.60795                       | 1.96574                         | 2.34659                       |
| n.a.               | 1.60917                       | 1.78271                         | 2.19883                       |
| ICT1               | 1.86327                       | 1.99457                         | 2.06577                       |
| DFFB               | 1.47759                       | 1.73099                         | 2.01046                       |
| USP7               | 1.63516                       | 1.68333                         | 2.09794                       |
| PAP                | 1.28859                       | 1.75648                         | 2.16521                       |
| BSG                | 1.72851                       | 1.73983                         | 2.44774                       |
| YIF1               | 1.69088                       | 1.99934                         | 2.26741                       |
| POLE               | 2.01623                       | 1.84675                         | 2.05241                       |
|                    | 1.42589                       | 1.92804                         | 2.35549                       |

| HGNC Symbol | Ex_100Tc | Ex_8Tc  | Ex_6Tc   | Ex_5Tc   | Ex_4Tc   | Ex_3Tc   |
|-------------|----------|---------|----------|----------|----------|----------|
| MYC         | 1.14494  | 2.72084 | 5.51345  | 7.63208  | 10.95632 | 15.01672 |
| CACNA1G     | 0.00607  | 0.02938 | 0.04077  | 0.05626  | 0.02905  | 0.03373  |
| NME1        | 0.62349  | 1.43929 | 2.34013  | 2.90831  | 3.57392  | 4.5836   |
| ADCY2       | 0.00946  | 0.0342  | 0.02784  | 0.07716  | 0.02054  | 0.02895  |
| C4orf9      | 0.02124  | 0.08426 | 0.045    | 0.04417  | 0.05143  | 0.07278  |
| FKBP5       | 0.0188   | 0.04225 | 0.07879  | 0.0634   | 0.09091  | 0.11095  |
| CRKL        | 0.00797  | 0.01968 | 0.01795  | 0.02388  | 0.03277  | 0.0207   |
| RFC5        | 0.00365  | 0.01919 | 0.01376  | 0.02814  | 0.03454  | 0.04425  |
| PPP2CA      | 0.01668  | 0.04509 | 0.04247  | 0.06434  | 0.07373  | 0.10709  |
| TIMM8A      | 0.00967  | 0.03884 | 0.04555  | 0.04775  | 0.14922  | 0.05596  |
| n.a.        | 0.00574  | 0.01295 | 0.02577  | 0.02039  | 0.03345  | 0.05116  |
| MAD2L1      | 0.00188  | 0.01042 | 0.02928  | 0.02576  | 0.02751  | 0.02325  |
| MRPL12      | 0.37371  | 0.56077 | 0.77596  | 0.83337  | 0.99352  | 1.15401  |
| NME1        | 1.03202  | 1.95079 | 3.3667   | 3.81699  | 5.04469  | 6.29718  |
| METTL1      | 0.03531  | 0.04793 | 0.07764  | 0.11283  | 0.13705  | 0.15323  |
| SLC7A5      | 0.02887  | 0.04378 | 0.07786  | 0.07021  | 0.10571  | 0.10603  |
| SRM         | 0.59308  | 0.93146 | 1.53687  | 1.95533  | 2.11241  | 2.67521  |
| IL1B        | 0.19083  | 0.3106  | 0.39531  | 0.40171  | 0.44765  | 0.55184  |
| PAICS       | 0.1931   | 0.30746 | 0.52878  | 0.65254  | 0.75528  | 1.15599  |
| TOMM40      | 0.26834  | 0.44636 | 0.54747  | 0.73507  | 0.73118  | 0.80137  |
| PYCR1       | 0.09818  | 0.18277 | 0.25753  | 0.31944  | 0.38002  | 0.49727  |
| UMPK        | 0.17828  | 0.27512 | 0.37137  | 0.45008  | 0.4898   | 0.51183  |
| LRP8        | 0.0241   | 0.01094 | 0.05411  | 0.10564  | 0.05556  | 0.06236  |
| DUSP14      | 0.01001  | 0.00521 | 0.02611  | 0.05492  | 0.02652  | 0.07292  |
| METAP1      | 0.02814  | 0.04556 | 0.0788   | 0.07314  | 0.09086  | 0.08043  |
| ABCE1       | 0.03376  | 0.06294 | 0.0813   | 0.09458  | 0.08224  | 0.10391  |
| PA2G4       | 2.27609  | 3.29638 | 4.99022  | 6.27142  | 7.11613  | 7.94653  |
| BOP1        | 0.22512  | 0.33403 | 0.47873  | 0.54116  | 0.57053  | 0.67442  |
| RANBP1      | 0.91393  | 1.44529 | 1.90911  | 2.46137  | 2.55222  | 3.6361   |
| CTPS        | 0.07787  | 0.14722 | 0.16947  | 0.23075  | 0.23679  | 0.26021  |
| TRAP1       | 0.33021  | 0.56462 | 0.9114   | 0.95538  | 1.1384   | 1.475    |
| HSPD1       | 0.89231  | 1.39915 | 2.13138  | 2.76721  | 3.46373  | 4.24481  |
| PFAS        | 0.07447  | 0.108   | 0.17163  | 0.2128   | 0.23305  | 0.25265  |
| TEAD4       | 0.05043  | 0.07495 | 0.10684  | 0.12837  | 0.13349  | 0.16469  |
| MIF         | 6.20475  | 9.80911 | 13.37389 | 12.47483 | 14.98075 | 16.64096 |
| VAR2        | 0.32776  | 0.52619 | 0.67921  | 0.7469   | 0.79481  | 0.93419  |
| CENTG1      | 0.47798  | 0.7797  | 0.98087  | 1.20231  | 1.40746  | 1.9107   |
| DSCR2       | 0.24978  | 0.33627 | 0.48692  | 0.58554  | 0.70823  | 1.00537  |
| JAG2        | 0.11819  | 0.14246 | 0.22425  | 0.2855   | 0.30794  | 0.40531  |
| PRKAR1B     | 0.06411  | 0.07774 | 0.11695  | 0.19249  | 0.13819  | 0.18706  |
| n.a.        | 0.02848  | 0.02838 | 0.04902  | 0.06015  | 0.07113  | 0.07544  |
| MATK        | 0.04219  | 0.01546 | 0.07179  | 0.10016  | 0.10373  | 0.12623  |
| IARS        | 0.67473  | 0.8146  | 0.99372  | 1.41678  | 1.37154  | 1.61748  |
| GAL         | 0.05764  | 0.1112  | 0.11263  | 0.13695  | 0.21253  | 0.26563  |
| MCAM        | 0.01156  | 0.02009 | 0.01801  | 0.02738  | 0.02515  | 0.03042  |
| CAD         | 0.08989  | 0.11537 | 0.16438  | 0.21521  | 0.23491  | 0.26237  |
| FH          | 0.67106  | 0.90287 | 1.0056   | 1.43407  | 1.55879  | 2.01406  |
| SRPK1       | 0.19094  | 0.24095 | 0.34002  | 0.45412  | 0.49353  | 0.61605  |
| NEFH        | 0.00196  | 0.02634 | 0.00351  | 0.1625   | 0.0449   | 0.06717  |
| NP          | 0.21698  | 0.29686 | 0.37147  | 0.44869  | 0.4605   | 0.5717   |
| AHCY        | 0.4101   | 0.54158 | 0.72434  | 0.87665  | 1.09071  | 1.15403  |
| POLD2       | 0.0526   | 0.05972 | 0.08534  | 0.11983  | 0.13813  | 0.1221   |
| C1QBP       | 1.19476  | 1.70364 | 2.35526  | 2.81015  | 3.1539   | 3.81133  |
| CAMKK2      | 0.10386  | 0.15136 | 0.19077  | 0.2573   | 0.30934  | 0.36831  |
| n.a.        | 0.07897  | 0.11468 | 0.131    | 0.24188  | 0.2344   | 0.24175  |
| BYSL        | 0.09076  | 0.13802 | 0.1772   | 0.19625  | 0.20504  | 0.24464  |
| NUP155      | 0.03857  | 0.02744 | 0.03072  | 0.09244  | 0.09189  | 0.09245  |

| HGNC Symbol | Ex_100Tc | Ex_8Tc  | Ex_6Tc  | Ex_5Tc  | Ex_4Tc  | Ex_3Tc  |
|-------------|----------|---------|---------|---------|---------|---------|
| IFRD2       | 0.12756  | 0.17517 | 0.24404 | 0.29537 | 0.42921 | 0.48926 |
| MRPL3       | 0.20557  | 0.28678 | 0.30329 | 0.53156 | 0.55857 | 0.64635 |
| HSPE1       | 1.63781  | 2.41191 | 3.2031  | 4.03558 | 4.60515 | 5.28121 |
| HSPE1       | 1.67426  | 2.2026  | 3.07637 | 4.11197 | 4.85821 | 5.62752 |
| n.a.        | 0.05356  | 0.05698 | 0.06008 | 0.10998 | 0.11278 | 0.13399 |
| EBNA1BP2    | 0.55653  | 0.76963 | 0.99163 | 1.28679 | 1.42234 | 1.69483 |
| TNFRSF8     | 0.01673  | 0.01415 | 0.0319  | 0.03517 | 0.05413 | 0.07485 |
| PRDX4       | 0.35361  | 0.57011 | 0.68207 | 0.78549 | 0.90824 | 1.2819  |
| CSE1L       | 0.10702  | 0.10764 | 0.16799 | 0.23711 | 0.27286 | 0.43601 |
| RPP40       | 0.01754  | 0.02472 | 0.00826 | 0.05538 | 0.05141 | 0.05683 |
| n.a.        | 0.00905  | 0.03827 | 0.0017  | 0.04505 | 0.0485  | 0.051   |
| HRMT1L2     | 0.38234  | 0.52272 | 0.70103 | 0.82727 | 0.86441 | 1.02337 |
| n.a.        | 0.02624  | 0.03069 | 0.04668 | 0.06422 | 0.05638 | 0.06381 |
| n.a.        | 0.16794  | 0.15729 | 0.27174 | 0.35423 | 0.38166 | 0.49922 |
| MADH4       | 0.13485  | 0.1751  | 0.23269 | 0.2921  | 0.35223 | 0.37166 |
| IL9         | 0.42716  | 0.61657 | 0.85126 | 0.8768  | 0.91416 | 1.16154 |
| PDCD11      | 0.13798  | 0.19542 | 0.21151 | 0.28612 | 0.28978 | 0.29121 |
| HK2         | 0.01304  | 0.00168 | 0.01933 | 0.04509 | 0.03817 | 0.03876 |
| PWP2H       | 0.18393  | 0.26146 | 0.28777 | 0.37297 | 0.37989 | 0.4188  |
| n.a.        | 0.02779  | 0.05215 | 0.03905 | 0.11638 | 0.09963 | 0.11767 |
| NOLC1       | 0.26072  | 0.37211 | 0.48101 | 0.5745  | 0.74024 | 0.85943 |
| NOLC1       | 0.62782  | 0.99734 | 1.19315 | 1.42979 | 1.42208 | 1.85845 |
| CCT2        | 2.43353  | 2.85904 | 3.68397 | 4.92438 | 5.43042 | 6.4547  |
| DTYMK       | 0.24184  | 0.38786 | 0.45957 | 0.49938 | 0.52004 | 0.60382 |
| HNRPAB      | 1.11177  | 1.58145 | 1.96094 | 2.42043 | 2.6421  | 3.10034 |
| FASN        | 0.12985  | 0.18444 | 0.22067 | 0.36647 | 0.43991 | 0.56015 |
| FASN        | 0.20909  | 0.34431 | 0.37885 | 0.42249 | 0.54651 | 0.59154 |
| NMB         | 0.029    | 0.06269 | 0.04747 | 0.07798 | 0.0687  | 0.06812 |
| CHC1        | 0.02175  | 0.03428 | 0.03752 | 0.04765 | 0.06105 | 0.07078 |
|             | 0.0532   | 0.08223 | 0.06607 | 0.16105 | 0.1703  | 0.17215 |
| KIAA0179    | 0.10126  | 0.09446 | 0.11186 | 0.1752  | 0.23248 | 0.22351 |
| NTHL1       | 0.19759  | 0.27218 | 0.34325 | 0.35878 | 0.48383 | 0.53325 |
| UNG         | 0.1111   | 0.12257 | 0.18103 | 0.21446 | 0.24322 | 0.29413 |
| KIAA0020    | 0.57771  | 0.70518 | 0.8732  | 1.13228 | 1.18744 | 1.41639 |
| n.a.        | 0.17974  | 0.2523  | 0.31659 | 0.34597 | 0.37724 | 0.44391 |
| n.a.        | 0.28034  | 0.33137 | 0.49722 | 0.53298 | 0.63765 | 0.76564 |
| POLE2       | 0.04097  | 0.04876 | 0.0674  | 0.0674  | 0.09221 | 0.11026 |
| MTHFD1      | 0.50365  | 0.76074 | 0.76954 | 0.93093 | 1.09158 | 1.2582  |
| NOL5A       | 0.65492  | 0.83479 | 1.02563 | 1.29937 | 1.4025  | 1.60872 |
| PRPS2       | 0.39836  | 0.47162 | 0.58868 | 0.74527 | 0.81358 | 0.99014 |
| RUVBL2      | 0.49898  | 0.6323  | 0.85521 | 0.93326 | 1.06465 | 1.21412 |
| GPI         | 0.55173  | 0.68824 | 0.90332 | 0.99447 | 1.16317 | 1.30269 |
| n.a.        | 0.44272  | 0.63342 | 0.83506 | 0.86109 | 0.96624 | 1.12451 |
| NPM3        | 0.09108  | 0.13665 | 0.22275 | 0.17743 | 0.21375 | 0.30308 |
| n.a.        | 0.08146  | 0.08426 | 0.14247 | 0.15775 | 0.1904  | 0.25346 |
| CDC20       | 0.20049  | 0.27713 | 0.40351 | 0.39241 | 0.49209 | 0.52744 |
| n.a.        | 0.13569  | 0.16154 | 0.18379 | 0.24523 | 0.29818 | 0.33534 |
| PRKDC       | 0.02381  | 0.03185 | 0.04084 | 0.04677 | 0.05683 | 0.05775 |
| CKS2        | 1.80037  | 1.76276 | 2.72813 | 2.96937 | 3.61872 | 4.24807 |
| CSE1L       | 0.12485  | 0.14767 | 0.20606 | 0.22585 | 0.29604 | 0.35585 |
| EEF1E1      | 0.08315  | 0.12681 | 0.16839 | 0.15695 | 0.20192 | 0.25799 |
| HRMT1L2     | 0.47836  | 0.52977 | 0.72411 | 0.8595  | 1.00109 | 1.16959 |
| n.a.        | 0.06957  | 0.12403 | 0.13413 | 0.11113 | 0.1698  | 0.19313 |
| TST         | 0.04798  | 0.08111 | 0.10307 | 0.08049 | 0.09903 | 0.10543 |
| DKC1        | 0.29098  | 0.35239 | 0.4892  | 0.55205 | 0.60176 | 0.69278 |
| RAN         | 0.98569  | 1.36938 | 1.677   | 1.73954 | 2.21275 | 2.69686 |
| PDGFRA      | 0.03783  | 0.04997 | 0.05511 | 0.06196 | 0.08098 | 0.09032 |

| HGNC Symbol | Ex_100Tc | Ex_8Tc   | Ex_6Tc   | Ex_5Tc   | Ex_4Tc   | Ex_3Tc   |
|-------------|----------|----------|----------|----------|----------|----------|
| CDK4        | 0.00445  | 0.01414  | 0.02387  | 0.00142  | 0.0242   | 0.02322  |
| ALDH1B1     | 0.04048  | 0.05875  | 0.07738  | 0.07008  | 0.09382  | 0.09468  |
| SORD        | 0.09745  | 0.13241  | 0.1999   | 0.18017  | 0.24083  | 0.298    |
| BDH         | 0.08213  | 0.10416  | 0.09352  | 0.15097  | 0.1854   | 0.19629  |
| GMPS        | 0.20718  | 0.25386  | 0.35901  | 0.39891  | 0.44805  | 0.50167  |
| GPR30       | 0.14782  | 0.14445  | 0.235    | 0.22368  | 0.2984   | 0.37236  |
| PHB         | 1.21131  | 1.44738  | 2.33034  | 2.37561  | 2.54409  | 3.273    |
| STRA13      | 0.18582  | 0.32551  | 0.33059  | 0.36067  | 0.42585  | 0.54466  |
| XPOT        | 0.14298  | 0.16212  | 0.26215  | 0.2352   | 0.34993  | 0.4242   |
| SMN1        | 0.0841   | 0.10862  | 0.11418  | 0.11899  | 0.17546  | 0.17625  |
| CHC1        | 0.3542   | 0.41133  | 0.59836  | 0.63713  | 0.77295  | 0.98191  |
| PLK1        | 0.19023  | 0.20572  | 0.28532  | 0.3273   | 0.39665  | 0.45907  |
| n.a.        | 0.03558  | 0.04319  | 0.07013  | 0.07242  | 0.0655   | 0.11747  |
| AK2         | 0.62993  | 0.76633  | 0.95519  | 1.03435  | 1.09063  | 1.4119   |
| n.a.        | 0.06003  | 0.06934  | 0.08938  | 0.0952   | 0.11612  | 0.13785  |
| MGST1       | 0.09221  | 0.11708  | 0.12889  | 0.14993  | 0.17617  | 0.28811  |
| CSDA        | 0.99187  | 1.17785  | 1.4786   | 1.5707   | 1.77027  | 2.11573  |
| n.a.        | 0.13484  | 0.11324  | 0.1639   | 0.19154  | 0.21258  | 0.31332  |
| ATP1B3      | 1.16721  | 1.37704  | 1.68907  | 2.10815  | 2.16425  | 2.46433  |
| BCS1L       | 0.10495  | 0.121    | 0.16099  | 0.16313  | 0.18758  | 0.2379   |
| UNG         | 0.09248  | 0.13337  | 0.13725  | 0.15604  | 0.17718  | 0.21076  |
| PBP         | 0.54093  | 0.56499  | 0.93605  | 0.95527  | 1.04152  | 1.15943  |
| CDC6        | 0.06507  | 0.08747  | 0.11341  | 0.10085  | 0.11515  | 0.1598   |
| CDC7        | 0.0575   | 0.06781  | 0.09571  | 0.11628  | 0.10539  | 0.15215  |
| MTAP        | 0.04326  | 0.02766  | 0.05673  | 0.09472  | 0.0847   | 0.08734  |
| ADSL        | 1.4174   | 1.84175  | 1.99404  | 2.4638   | 2.42568  | 2.84691  |
| CDKN3       | 0.39936  | 0.54619  | 0.65379  | 0.74177  | 0.78962  | 0.98577  |
| VRK1        | 0.52524  | 0.55605  | 0.66497  | 0.86459  | 0.91363  | 1.06823  |
| WFDC2       | 0.05956  | 0.05717  | 0.07518  | 0.09169  | 0.0959   | 0.12413  |
| GSPT1       | 0.37069  | 0.47467  | 0.52939  | 0.57956  | 0.67086  | 0.76695  |
| SLC39A14    | 0.09032  | 0.0833   | 0.12974  | 0.1609   | 0.16822  | 0.23059  |
| n.a.        | 0.13982  | 0.19078  | 0.24444  | 0.23266  | 0.25702  | 0.30723  |
| RLN2        | 0.05153  | 0.08816  | 0.07862  | 0.08449  | 0.08088  | 0.11985  |
| BAG2        | 0.09834  | 0.09048  | 0.13213  | 0.13741  | 0.16019  | 0.20125  |
| HSD17B8     | 0.06016  | 0.05006  | 0.1131   | 0.10165  | 0.10493  | 0.14448  |
| UCHL3       | 0.62729  | 0.61884  | 0.80061  | 1.04594  | 1.06913  | 1.29383  |
| NME2        | 7.55561  | 10.38378 | 12.64778 | 13.29127 | 14.58179 | 18.41978 |
| MRPS12      | 0.32137  | 0.41112  | 0.51989  | 0.51661  | 0.62005  | 0.6485   |
| PCNA        | 0.8066   | 1.02107  | 1.23744  | 1.41216  | 1.4529   | 1.80271  |
| DPH2L2      | 0.07028  | 0.06583  | 0.1013   | 0.09406  | 0.1335   | 0.15561  |
| CCNB1       | 0.85245  | 0.92052  | 1.23335  | 1.37378  | 1.62246  | 1.99532  |
| MC1R        | 0.48549  | 0.4532   | 0.69749  | 0.95791  | 0.96435  | 1.23738  |
| SOD1        | 2.5858   | 3.45486  | 3.7023   | 4.49667  | 4.68941  | 5.51018  |
| ATP5G3      | 3.3077   | 4.20899  | 4.27423  | 5.60963  | 6.12595  | 6.67483  |
| CCT3        | 1.72846  | 2.0646   | 2.79991  | 3.44075  | 3.40841  | 3.87786  |
| RFC4        | 0.27426  | 0.35881  | 0.37662  | 0.48591  | 0.51809  | 0.59728  |
| CDC25A      | 0.03912  | 0.04158  | 0.08498  | 0.06342  | 0.06112  | 0.08291  |
| FRDA        | 0.25496  | 0.26757  | 0.39688  | 0.42322  | 0.49335  | 0.60397  |
| SNRPD1      | 0.12746  | 0.14801  | 0.21029  | 0.27204  | 0.25391  | 0.26763  |
| CHAF1A      | 0.11977  | 0.15836  | 0.19916  | 0.18424  | 0.19483  | 0.24565  |
| PRDX2       | 0.82861  | 1.0668   | 1.30645  | 1.51599  | 1.5828   | 1.82565  |
| BUB1        | 0.44618  | 0.46291  | 0.57289  | 0.70704  | 0.75849  | 0.89866  |
| CDC2        | 0.70282  | 0.87813  | 1.16183  | 1.30499  | 1.39656  | 1.64473  |
| POLR1C      | 0.18392  | 0.25254  | 0.30128  | 0.30304  | 0.35209  | 0.43614  |
| SLC19A1     | 0.04916  | 0.00569  | 0.04112  | 0.05153  | 0.07274  | 0.30415  |
| TOMM20      | 0.51946  | 0.64114  | 0.70457  | 0.82917  | 0.93901  | 1.07925  |
| MMP3        | 0.04623  | 0.05491  | 0.08705  | 0.09128  | 0.09137  | 0.1078   |

| HGNC Symbol | Ex_100Tc | Ex_8Tc  | Ex_6Tc   | Ex_5Tc   | Ex_4Tc   | Ex_3Tc   |
|-------------|----------|---------|----------|----------|----------|----------|
| UBE2C       | 1.35685  | 1.68073 | 2.14081  | 2.37378  | 2.66406  | 3.20427  |
| PTPN2       | 0.05123  | 0.07934 | 0.08731  | 0.09952  | 0.09626  | 0.13627  |
| RUVBL1      | 0.3056   | 0.37941 | 0.47328  | 0.54928  | 0.58195  | 0.63066  |
| TYMS        | 0.58175  | 0.75875 | 0.94859  | 0.99175  | 1.15885  | 1.20854  |
| DDX10       | 0.24365  | 0.22511 | 0.3165   | 0.40521  | 0.41165  | 0.51093  |
| TUFM        | 1.56785  | 2.07254 | 2.14171  | 2.68676  | 2.7756   | 3.20988  |
| AURKB       | 0.32169  | 0.53301 | 0.56115  | 0.49698  | 0.56539  | 0.7117   |
| RRS1        | 0.08735  | 0.06338 | 0.12137  | 0.13614  | 0.14353  | 0.18376  |
| GEMIN4      | 0.2555   | 0.32168 | 0.4234   | 0.4994   | 0.48664  | 0.5493   |
| PTMA        | 6.78421  | 9.25981 | 10.07721 | 11.49298 | 13.38787 | 16.01615 |
| CYP51A1     | 0.13159  | 0.13805 | 0.14288  | 0.1814   | 0.18395  | 0.21591  |
| ARHGEF5     | 0.01301  | 0.02177 | 0.01552  | 0.00389  | 0.01615  | 0.02226  |
| KIAA0690    | 0.15442  | 0.14763 | 0.17722  | 0.23949  | 0.26635  | 0.2823   |
| VDAC1       | 0.39322  | 0.39711 | 0.48106  | 0.5248   | 0.65884  | 0.68627  |
| DDX1        | 0.96723  | 1.21099 | 1.2092   | 1.56729  | 1.56389  | 1.8654   |
| SCAMP1      | 0.08669  | 0.04982 | 0.07383  | 0.11709  | 0.13411  | 0.14573  |
| DDX18       | 0.43402  | 0.49942 | 0.51273  | 0.6524   | 0.66894  | 0.72111  |
| PES1        | 0.40434  | 0.46262 | 0.59507  | 0.69203  | 0.69321  | 0.78574  |
| RANGAP1     | 0.10006  | 0.10162 | 0.13747  | 0.14422  | 0.14854  | 0.18005  |
| APEX1       | 0.1743   | 0.23255 | 0.26857  | 0.2912   | 0.32431  | 0.3448   |
| MYBL2       | 0.19153  | 0.24814 | 0.26918  | 0.29164  | 0.31745  | 0.36558  |
| USP10       | 0.09064  | 0.09243 | 0.05771  | 0.18437  | 0.15377  | 0.17499  |
| n.a.        | 0.04877  | 0.03711 | 0.05672  | 0.0846   | 0.06836  | 0.08499  |
| RPA3        | 0.20008  | 0.28308 | 0.3321   | 0.30926  | 0.36863  | 0.38817  |
| CXCL12      | 0.04354  | 0.04356 | 0.06168  | 0.04836  | 0.07894  | 0.08092  |
| n.a.        | 0.03933  | 0.03851 | 0.05566  | 0.03665  | 0.07557  | 0.0692   |
| MCM3        | 0.22131  | 0.39617 | 0.24249  | 0.37917  | 0.35938  | 0.43948  |
| GMNN        | 0.15097  | 0.15009 | 0.22639  | 0.2091   | 0.25006  | 0.28891  |
| HSPA9B      | 0.87101  | 0.9069  | 1.23526  | 1.3119   | 1.47143  | 1.73671  |
| TCERG1      | 0.18957  | 0.15319 | 0.2714   | 0.26835  | 0.29363  | 0.35711  |
| RNU3IP2     | 0.19819  | 0.21141 | 0.27326  | 0.28772  | 0.33393  | 0.37642  |
| SFRS7       | 1.02456  | 1.25452 | 1.39769  | 1.69077  | 1.75382  | 1.87979  |
| MSH6        | 0.73302  | 0.84452 | 0.94861  | 1.11714  | 1.35018  | 1.46137  |
| CENPF       | 0.32252  | 0.34947 | 0.43437  | 0.55535  | 0.55215  | 0.61098  |
| MXI1        | 0.07378  | 0.09181 | 0.09691  | 0.0972   | 0.08826  | 0.13298  |
| AMD1        | 0.2423   | 0.23681 | 0.3559   | 0.42642  | 0.4395   | 0.46512  |
| ELK1        | 0.18848  | 0.18717 | 0.23669  | 0.23671  | 0.28941  | 0.29197  |
| ILF3        | 0.3812   | 0.4695  | 0.48673  | 0.64706  | 0.55348  | 0.7183   |
| TFDP1       | 0.2903   | 0.30143 | 0.38     | 0.34716  | 0.44893  | 0.49598  |
| n.a.        | 0.21101  | 0.2126  | 0.30828  | 0.30269  | 0.34447  | 0.39533  |
| TOP2A       | 0.19435  | 0.21933 | 0.25773  | 0.25915  | 0.33606  | 0.37715  |
| EIF5A       | 0.29621  | 0.33319 | 0.42675  | 0.39059  | 0.47944  | 0.52491  |
| n.a.        | 0.02757  | 0.02822 | 0.03701  | 0.04104  | 0.06982  | 0.05466  |
| n.a.        | 0.28131  | 0.34735 | 0.35721  | 0.41436  | 0.44881  | 0.51171  |
| ATIC        | 1.68325  | 1.89152 | 2.22084  | 2.8356   | 3.00291  | 3.29863  |
| ATIC        | 0.78872  | 0.95959 | 1.05788  | 1.1388   | 1.26879  | 1.49529  |
| PEX5        | 0.08866  | 0.09568 | 0.09127  | 0.12703  | 0.12801  | 0.17709  |
| TAF4B       | 0.07043  | 0.0724  | 0.08995  | 0.05523  | 0.11239  | 0.12764  |
| HDGF        | 0.36462  | 0.44614 | 0.51379  | 0.52403  | 0.55071  | 0.67558  |
| HDGF        | 0.81301  | 1.04123 | 1.13866  | 1.38824  | 1.28702  | 1.61672  |
| ILF2        | 1.38592  | 1.67342 | 1.9281   | 2.15145  | 2.16057  | 2.59353  |
| CCNA2       | 0.12282  | 0.14654 | 0.20375  | 0.16241  | 0.20873  | 0.24156  |
| MDH2        | 0.64929  | 0.79251 | 0.92431  | 1.12829  | 1.13097  | 1.2361   |
| PEG10       | 0.02075  | 0.03008 | 0.05109  | 0.04636  | 0.0354   | 0.03904  |
| PPRC1       | 0.07047  | 0.06655 | 0.09263  | 0.10562  | 0.1226   | 0.13518  |
| SSRP1       | 0.72021  | 0.8971  | 0.97503  | 1.07707  | 1.26108  | 1.42683  |
| PTK9        | 0.00151  | 0.00203 | 0.00118  | 0.00177  | 0.00295  | 0.00264  |

| HGNC Symbol | Ex_100Tc | Ex_8Tc  | Ex_6Tc  | Ex_5Tc  | Ex_4Tc  | Ex_3Tc  |
|-------------|----------|---------|---------|---------|---------|---------|
| ACSL1       | 0.16541  | 0.15166 | 0.17461 | 0.23126 | 0.22849 | 0.27658 |
| PFKM        | 0.23965  | 0.30738 | 0.36714 | 0.44435 | 0.44154 | 0.47195 |
| HNRPD       | 0.38179  | 0.39766 | 0.4517  | 0.52815 | 0.54946 | 0.6727  |
| RPIA        | 0.17969  | 0.16909 | 0.21038 | 0.2724  | 0.32226 | 0.31697 |
| SLC16A1     | 0.01258  | 0.0052  | 0.01877 | 0.00825 | 0.02344 | 0.01943 |
| KCNJ6       | 0.44605  | 0.57032 | 0.64367 | 0.67001 | 0.76323 | 0.8247  |
| SFRS2       | 4.06265  | 4.17249 | 4.51995 | 5.52168 | 5.89467 | 7.18378 |
| PRKCI       | 0.03793  | 0.03212 | 0.05032 | 0.04552 | 0.05732 | 0.06172 |
| POLR2H      | 0.25996  | 0.34345 | 0.43898 | 0.44009 | 0.45822 | 0.5112  |
| ABCE1       | 0.04365  | 0.02997 | 0.04205 | 0.06384 | 0.12019 | 0.06809 |
| MELK        | 0.07897  | 0.10064 | 0.09106 | 0.10175 | 0.12393 | 0.13906 |
| DDX21       | 0.04435  | 0.03282 | 0.07481 | 0.06756 | 0.14962 | 0.0593  |
| SSSCA1      | 0.32994  | 0.37188 | 0.4429  | 0.48868 | 0.52068 | 0.53446 |
| n.a.        | 0.39139  | 0.47498 | 0.51744 | 0.57769 | 0.64175 | 0.68347 |
| HSPCA       | 0.34543  | 0.33887 | 0.53216 | 0.48753 | 0.7007  | 0.53833 |
| DEAF1       | 0.27876  | 0.29724 | 0.34559 | 0.39591 | 0.4384  | 0.47267 |
| n.a.        | 0.15422  | 0.1555  | 0.18537 | 0.26423 | 0.25285 | 0.2964  |
| EIF1AX      | 0.05823  | 0.04822 | 0.08311 | 0.09002 | 0.12483 | 0.10284 |
| n.a.        | 2.16861  | 2.63815 | 2.99197 | 3.3629  | 3.6305  | 3.76247 |
| n.a.        | 0.11253  | 0.12339 | 0.13379 | 0.13556 | 0.1509  | 0.18263 |
| SF3A3       | 0.48299  | 0.50785 | 0.64764 | 0.6047  | 0.68941 | 0.78262 |
| n.a.        | 0.01769  | 0.02525 | 0.03465 | 0.03349 | 0.02706 | 0.03557 |
| AK2         | 0.22594  | 0.2029  | 0.23451 | 0.30261 | 0.35811 | 0.37682 |
| PLAUR       | 0.02058  | 0.02105 | 0.04775 | 0.10205 | 0.08882 | 0.06467 |
| SCARB1      | 0.29118  | 0.22465 | 0.39207 | 0.43555 | 0.42046 | 0.45024 |
| MCM2        | 0.95433  | 1.18717 | 1.35289 | 1.52955 | 1.51103 | 1.67527 |
| EXOSC7      | 0.20215  | 0.24581 | 0.30236 | 0.28921 | 0.31601 | 0.35319 |
| KHSRP       | 2.39112  | 2.46335 | 2.84733 | 3.45164 | 3.66491 | 4.00287 |
| NUDC        | 0.72867  | 0.92336 | 1.04643 | 1.0801  | 1.07674 | 1.22004 |
| CGRRF1      | 0.21023  | 0.21271 | 0.28372 | 0.37179 | 0.32569 | 0.45528 |
| APEX1       | 0.39394  | 0.43275 | 0.53017 | 0.60873 | 0.64374 | 0.66526 |
| GARS        | 1.05699  | 1.26298 | 1.26319 | 1.49055 | 1.53044 | 1.96357 |
| EIF3S9      | 1.19013  | 1.44633 | 1.65457 | 1.8181  | 1.94003 | 2.10047 |
| IMPDH1      | 0.18156  | 0.21177 | 0.22634 | 0.27213 | 0.26281 | 0.28861 |
| VEGF        | 0.00953  | 0.01785 | 0.00982 | 0.00918 | 0.0149  | 0.04514 |
| TFDP2       | 0.09494  | 0.1053  | 0.09638 | 0.10033 | 0.15867 | 0.16103 |
| PRDX1       | 4.71743  | 4.96304 | 5.98365 | 6.65052 | 7.27766 | 7.5817  |
| SCO2        | 0.21479  | 0.23957 | 0.37451 | 0.34625 | 0.42403 | 0.39414 |
| TUBG1       | 0.10715  | 0.12251 | 0.1324  | 0.17265 | 0.19354 | 0.21129 |
| MYCN        | 0.07736  | 0.08694 | 0.10984 | 0.10834 | 0.12966 | 0.12706 |
| ABL2        | 0.0213   | 0.03045 | 0.02046 | 0.02581 | 0.02656 | 0.03035 |
| SLC20A1     | 0.31071  | 0.35455 | 0.45075 | 0.62141 | 0.50668 | 0.56476 |
| CDKN2B      | 0.01813  | 0.02984 | 0.04801 | 0.03193 | 0.03226 | 0.03848 |
| n.a.        | 0.38294  | 0.4242  | 0.46436 | 0.6373  | 0.60362 | 0.57439 |
| FANCG       | 0.21066  | 0.2847  | 0.30442 | 0.31181 | 0.34771 | 0.38879 |
| PMPCA       | 0.96683  | 1.08602 | 1.15648 | 1.44322 | 1.25674 | 1.34773 |
| PSMC3       | 0.51492  | 0.68422 | 0.71401 | 0.6735  | 0.78355 | 0.80523 |
| MCM7        | 1.3928   | 2.07175 | 2.04609 | 2.18716 | 2.23329 | 2.62859 |
| ABCA3       | 0.07064  | 0.06987 | 0.08227 | 0.11617 | 0.10355 | 0.14452 |
| EIF4EBP1    | 0.42807  | 0.49271 | 0.54044 | 0.56871 | 0.57    | 0.61791 |
| TNFRSF4     | 0.02418  | 0.03075 | 0.03178 | 0.02774 | 0.03102 | 0.02359 |
| SRP72       | 0.53034  | 0.53248 | 0.68798 | 0.70946 | 0.84177 | 0.72381 |
| ALG3        | 0.13167  | 0.11852 | 0.16198 | 0.16048 | 0.1748  | 0.19513 |
| CKS1B       | 0.09816  | 0.10628 | 0.12768 | 0.15319 | 0.15184 | 0.15428 |
| NSEP1       | 3.95051  | 3.98514 | 5.37267 | 5.63018 | 6.16381 | 6.93133 |
| FARSLA      | 0.33628  | 0.37924 | 0.44664 | 0.44722 | 0.506   | 0.6222  |
| PRIM1       | 0.1101   | 0.11122 | 0.1329  | 0.14163 | 0.1645  | 0.19582 |

| HGNC Symbol | Ex_100Tc | Ex_8Tc   | Ex_6Tc   | Ex_5Tc   | Ex_4Tc   | Ex_3Tc  |
|-------------|----------|----------|----------|----------|----------|---------|
| TBL3        | 0.48851  | 0.50596  | 0.60434  | 0.675    | 0.72975  | 0.81081 |
| JUND        | 0.25807  | 0.33436  | 0.36092  | 0.34028  | 0.37028  | 0.40871 |
| PTBP1       | 0.4095   | 0.46081  | 0.47345  | 0.56014  | 0.5863   | 0.60836 |
| MRE11A      | 0.15035  | 0.1686   | 0.21549  | 0.19567  | 0.23543  | 0.24932 |
| HSPA5       | 0.75249  | 0.84951  | 0.92717  | 0.98337  | 1.08007  | 1.14506 |
| OAT         | 0.1011   | 0.11118  | 0.11261  | 0.1216   | 0.1765   | 0.16929 |
| TFRC        | 1.12985  | 1.17963  | 1.14275  | 1.31774  | 1.40307  | 1.53813 |
| SHMT1       | 0.04076  | 0.04125  | 0.07848  | 0.05434  | 0.06216  | 0.06819 |
| CLNS1A      | 1.56246  | 1.84368  | 1.93986  | 2.15405  | 2.18549  | 2.48371 |
| SEMA3C      | 0.01354  | 0.01899  | 0.01927  | 0.02928  | 0.00815  | 0.02562 |
| MCAM        | 0.06783  | 0.06671  | 0.07432  | 0.09025  | 0.09407  | 0.09596 |
| MAPKAPK5    | 0.40885  | 0.48439  | 0.5849   | 0.5426   | 0.53403  | 0.63745 |
| SIP1        | 0.04566  | 0.04862  | 0.061    | 0.0596   | 0.05537  | 0.09301 |
| NF2         | 0.09853  | 0.11411  | 0.13523  | 0.12826  | 0.14291  | 0.16127 |
| SLC1A5      | 0.0621   | 0.0916   | 0.09792  | 0.12481  | 0.11516  | 0.10863 |
| PSMA2       | 1.22018  | 1.45143  | 1.43304  | 1.61982  | 1.68332  | 1.93955 |
| RAD51C      | 0.49556  | 0.53203  | 0.48569  | 0.5355   | 0.58634  | 0.6591  |
| CTSC        | 0.10053  | 0.09636  | 0.10789  | 0.11007  | 0.1375   | 0.16207 |
| HSPA8       | 2.32214  | 2.51969  | 3.12476  | 3.34063  | 3.79412  | 3.6899  |
| n.a.        | 0.04139  | 0.02115  | 0.02105  | 0.04959  | 0.04137  | 0.05784 |
| IGFBP2      | 0.54367  | 0.57135  | 0.57054  | 0.53238  | 0.65417  | 0.69318 |
| DARS        | 0.23787  | 0.25718  | 0.24994  | 0.31995  | 0.3254   | 0.33621 |
| UCHL3       | 0.40776  | 0.41674  | 0.46925  | 0.54363  | 0.61533  | 0.66662 |
| GTF3A       | 1.70377  | 1.65382  | 1.95218  | 2.42211  | 2.3264   | 2.60168 |
| RPL5        | 9.28582  | 10.48347 | 11.07853 | 12.57631 | 14.36083 | 14.9781 |
| AMD1        | 0.10198  | 0.07544  | 0.09351  | 0.13814  | 0.13358  | 0.15504 |
| HSPA1A      | 0.02171  | 0.04854  | 0.05433  | 0.0439   | 0.03651  | 0.03983 |
| SYNGR3      | 0.1103   | 0.09921  | 0.1085   | 0.11413  | 0.14458  | 0.17713 |
| NINJ1       | 0.02294  | 0.00553  | 0.02076  | 0.01306  | 0.02407  | 0.01743 |
| SNRPA1      | 0.99392  | 1.0957   | 1.35926  | 1.41302  | 1.3687   | 1.54334 |
| TAF9        | 0.79486  | 0.89246  | 0.92783  | 1.02704  | 1.08839  | 1.17719 |
| SYNCRIP     | 0.32768  | 0.43255  | 0.40341  | 0.55959  | 0.57377  | 0.62902 |
| n.a.        | 0.31747  | 0.38994  | 0.41464  | 0.41903  | 0.45305  | 0.50997 |
| ITGB3BP     | 0.14705  | 0.1634   | 0.18194  | 0.18643  | 0.23344  | 0.24143 |
| PTPRF       | 0.04472  | 0.0479   | 0.03512  | 0.06466  | 0.05812  | 0.06393 |
| CHEK1       | 0.08152  | 0.08298  | 0.10438  | 0.10791  | 0.11237  | 0.12507 |
| TCEB1       | 1.34027  | 1.40933  | 1.50326  | 1.83685  | 1.8602   | 2.08546 |
| n.a.        | 0.30113  | 0.27245  | 0.38476  | 0.42862  | 0.41617  | 0.43259 |
| VBP1        | 0.34198  | 0.31257  | 0.37004  | 0.39571  | 0.47177  | 0.53547 |
| BUB1B       | 0.10896  | 0.12627  | 0.13965  | 0.17109  | 0.15607  | 0.17487 |
| RACGAP1     | 0.24069  | 0.21418  | 0.30187  | 0.34282  | 0.38439  | 0.41727 |
| AK3         | 0.03125  | 0.05289  | 0.03033  | 0.1052   | 0.05431  | 0.06458 |
| HNRPF       | 2.56957  | 3.16554  | 3.09992  | 3.80763  | 3.8582   | 4.10454 |
| PDAP1       | 0.10366  | 0.1073   | 0.14182  | 0.11455  | 0.14864  | 0.17254 |
| SELE        | 0.07899  | 0.10097  | 0.09282  | 0.10603  | 0.10238  | 0.09844 |
| n.a.        | 0.06018  | 0.06911  | 0.07383  | 0.09532  | 0.10409  | 0.10128 |
| RCN1        | 0.01328  | 0.00308  | 0.00844  | 0.02708  | 0.02065  | 0.02735 |
| GLDC        | 0.06879  | 0.03697  | 0.07299  | 0.08051  | 0.08296  | 0.09708 |
| PMS1        | 0.02839  | 0.03039  | 0.0251   | 0.03317  | 0.04901  | 0.03082 |
| PFKP        | 0.27196  | 0.24657  | 0.28492  | 0.30814  | 0.31283  | 0.386   |
| PDCD2       | 0.13822  | 0.14414  | 0.17288  | 0.17868  | 0.2119   | 0.20429 |
| MGST2       | 0.28792  | 0.36902  | 0.32933  | 0.35968  | 0.35124  | 0.33649 |
| NDUFB7      | 0.95357  | 1.11146  | 1.21047  | 1.11802  | 1.30349  | 1.40165 |
| G22P1       | 0.927    | 1.12744  | 1.14488  | 1.27756  | 1.32755  | 1.4206  |
| n.a.        | 0.21279  | 0.2809   | 0.24754  | 0.27432  | 0.2751   | 0.32315 |
| PBEF1       | 0.03354  | 0.02307  | 0.04258  | 0.03418  | 0.02872  | 0.04471 |
| TBL2        | 0.09804  | 0.09615  | 0.13141  | 0.10744  | 0.14808  | 0.13817 |



| HGNC Symbol | Ex_100Tc | Ex_8Tc  | Ex_6Tc  | Ex_5Tc  | Ex_4Tc  | Ex_3Tc  |
|-------------|----------|---------|---------|---------|---------|---------|
| GCN5L2      | 0.08182  | 0.06675 | 0.09701 | 0.12569 | 0.10564 | 0.11266 |
| CDK2AP1     | 0.47154  | 0.57341 | 0.51373 | 0.60649 | 0.60968 | 0.6369  |
| NOL1        | 0.23735  | 0.27966 | 0.30737 | 0.2765  | 0.31323 | 0.36886 |
| SLC29A1     | 0.34088  | 0.35329 | 0.31044 | 0.32478 | 0.42138 | 0.50353 |
| BNIP1       | 0.03886  | 0.05899 | 0.08056 | 0.05333 | 0.05937 | 0.05209 |
| DBN1        | 0.09242  | 0.08988 | 0.08229 | 0.10676 | 0.10735 | 0.12408 |
| EIF4G1      | 0.33189  | 0.3699  | 0.39705 | 0.44938 | 0.47865 | 0.53004 |
| B4GALT2     | 0.04218  | 0.02359 | 0.0474  | 0.05194 | 0.04711 | 0.06299 |
| TMEM5       | 0.34116  | 0.29113 | 0.34726 | 0.41258 | 0.42727 | 0.4504  |
| FVT1        | 0.01519  | 0.00335 | 0.00242 | 0.02405 | 0.01886 | 0.0206  |
| ETF1        | 0.04067  | 0.03906 | 0.05768 | 0.06627 | 0.07259 | 0.07178 |
| ATF4        | 1.88943  | 1.99796 | 1.92948 | 1.87651 | 2.17823 | 2.32789 |
| ILF3        | 0.22464  | 0.26282 | 0.27681 | 0.32946 | 0.32474 | 0.35246 |
| RAMP1       | 0.08388  | 0.11987 | 0.09936 | 0.05164 | 0.09182 | 0.12973 |
| n.a.        | 0.3993   | 0.43387 | 0.47895 | 0.52065 | 0.51597 | 0.62223 |
| ADCY3       | 0.22559  | 0.13985 | 0.17889 | 0.2202  | 0.25304 | 0.28231 |
| AFG3L2      | 0.44324  | 0.49942 | 0.50799 | 0.56748 | 0.57405 | 0.62565 |
| PRPS1       | 0.06302  | 0.07125 | 0.08003 | 0.06555 | 0.08568 | 0.07188 |
| OPRS1       | 0.02986  | 0.0113  | 0.0256  | 0.03452 | 0.03244 | 0.05642 |
| TOMM70A     | 0.06186  | 0.07491 | 0.09353 | 0.08841 | 0.11767 | 0.11747 |
| APRT        | 1.00542  | 1.30054 | 1.45028 | 1.38925 | 1.47388 | 1.55704 |
| FGFR4       | 0.02857  | 0.01999 | 0.03134 | 0.01791 | 0.03238 | 0.03182 |
| DEFA6       | 0.02631  | 0.03105 | 0.04945 | 0.02157 | 0.05138 | 0.03182 |
| ZNF9        | 0.048    | 0.07908 | 0.09614 | 0.10504 | 0.34763 | 0.09401 |
| RAC3        | 0.01003  | 0.00121 | 0.00196 | 0.03452 | 0.0249  | 0.02332 |
| WNT10B      | 0.01066  | 0.03253 | 0.00968 | 0.04605 | 0.03987 | 0.0236  |
| NFRKB       | 0.03746  | 0.04885 | 0.0523  | 0.03658 | 0.06031 | 0.06001 |
| CDK5R2      | 0.01863  | 0.02181 | 0.00582 | 0.02166 | 0.01281 | 0.0181  |
| CYCS        | 0.01218  | 0.00169 | 0.00998 | 0.02903 | 0.02228 | 0.03194 |
| YES1        | 0.11124  | 0.11174 | 0.11177 | 0.1041  | 0.13646 | 0.13145 |
| DLEU1       | 0.18316  | 0.19746 | 0.21521 | 0.20671 | 0.24321 | 0.24204 |
| BNIP3       | 0.43367  | 0.41211 | 0.47508 | 0.4351  | 0.49601 | 0.55279 |
| RAD23A      | 0.67809  | 0.76187 | 0.76848 | 0.86686 | 0.94874 | 0.98028 |
|             | 0.01616  | 0.00672 | 0.02256 | 0.06121 | 0.0278  | 0.02034 |
| UBE2G2      | 0.29203  | 0.3657  | 0.34651 | 0.40251 | 0.42557 | 0.41901 |
| KCNQ3       | 0.02216  | 0.01863 | 0.02247 | 0.01413 | 0.01441 | 0.02051 |
| MTA1        | 0.2546   | 0.28328 | 0.29005 | 0.25875 | 0.3021  | 0.33944 |
| LIG3        | 0.07288  | 0.09509 | 0.08375 | 0.07282 | 0.09686 | 0.08314 |
| ITGA2B      | 0.02521  | 0.03456 | 0.03246 | 0.04787 | 0.04326 | 0.0378  |
| TOMM34      | 0.02836  | 0.03311 | 0.02564 | 0.01013 | 0.06922 | 0.04264 |
| ITIH4       | 0.0616   | 0.06368 | 0.07406 | 0.0757  | 0.08876 | 0.0693  |
| POLD1       | 0.41801  | 0.508   | 0.53439 | 0.51785 | 0.55239 | 0.63458 |
| IKBKAP      | 0.13526  | 0.14621 | 0.12617 | 0.16026 | 0.16609 | 0.17568 |
| ASNS        | 0.06102  | 0.04786 | 0.05003 | 0.05341 | 0.07206 | 0.06873 |
| MX1         | 0.01523  | 0.01857 | 0.01247 | 0.01549 | 0.02065 | 0.00789 |
| XRCC5       | 0.04533  | 0.07403 | 0.0706  | 0.08603 | 0.09411 | 0.09476 |
| XPO1        | 0.56709  | 0.61779 | 0.63377 | 0.74382 | 0.7914  | 0.82155 |
| RAD54L      | 0.06474  | 0.08469 | 0.10937 | 0.11006 | 0.09206 | 0.10882 |
| PTHLH       | 0.02767  | 0.0162  | 0.02579 | 0.0355  | 0.00735 | 0.012   |
| MSH2        | 0.21356  | 0.25043 | 0.26256 | 0.29872 | 0.35736 | 0.40659 |
| CDKL1       | 0.05966  | 0.05407 | 0.07602 | 0.15483 | 0.07001 | 0.07519 |
| ADA         | 0.14931  | 0.16258 | 0.1941  | 0.18337 | 0.20516 | 0.20208 |
| n.a.        | 0.26816  | 0.29025 | 0.27186 | 0.33373 | 0.28207 | 0.30218 |
| TGFB1       | 0.00152  | 0.0011  | 0.00135 | 0.01083 | 0.00106 | 0.00098 |
| NPTX2       | 0.01218  | 0.00511 | 0.02093 | 0.01963 | 0.0043  | 0.00758 |
| BAG1        | 0.39355  | 0.50764 | 0.46188 | 0.51445 | 0.47019 | 0.52385 |
| BAG1        | 0.55042  | 0.63504 | 0.64688 | 0.66238 | 0.60964 | 0.64535 |

| HGNC Symbol | Ex_100Tc | Ex_8Tc  | Ex_6Tc  | Ex_5Tc  | Ex_4Tc  | Ex_3Tc  |
|-------------|----------|---------|---------|---------|---------|---------|
| SHB         | 0.10253  | 0.08904 | 0.08691 | 0.09023 | 0.10646 | 0.0972  |
| EIF3S10     | 0.32007  | 0.29646 | 0.36677 | 0.44098 | 0.43324 | 0.45929 |
| HTATIP2     | 0.01919  | 0.028   | 0.03216 | 0.02212 | 0.02828 | 0.0221  |
| CALCA       | 0.02953  | 0.0335  | 0.0427  | 0.0464  | 0.04755 | 0.04243 |
| C6orf108    | 1.0813   | 1.28889 | 1.38078 | 1.4197  | 1.55194 | 1.5482  |
| ACY1        | 0.09536  | 0.14241 | 0.11009 | 0.10262 | 0.13609 | 0.14286 |
| PASK        | 0.03702  | 0.02916 | 0.02857 | 0.02528 | 0.02879 | 0.03896 |
| CEBPZ       | 0.35846  | 0.33932 | 0.38175 | 0.42855 | 0.46788 | 0.47004 |
| RAP1A       | 0.0671   | 0.0511  | 0.04558 | 0.07176 | 0.06409 | 0.0593  |
| NID         | 0.01184  | 0.01485 | 0.02136 | 0.03753 | 0.0404  | 0.02844 |
| IDE         | 0.13186  | 0.13929 | 0.15347 | 0.14859 | 0.17437 | 0.18971 |
| HOXB7       | 0.03686  | 0.04668 | 0.04417 | 0.02622 | 0.03989 | 0.03739 |
| GUCY1B2     | 0.16724  | 0.20338 | 0.24716 | 0.23426 | 0.25482 | 0.26888 |
| SERPINA7    | 0.06614  | 0.05808 | 0.08281 | 0.07784 | 0.10047 | 0.09698 |
| FPRL2       | 0.04564  | 0.05223 | 0.05722 | 0.06066 | 0.05875 | 0.05657 |
| MTRR        | 0.15991  | 0.14022 | 0.16785 | 0.22061 | 0.20315 | 0.17903 |
| THRA        | 0.20562  | 0.20507 | 0.22065 | 0.25115 | 0.25027 | 0.24268 |
| POR         | 0.15723  | 0.1794  | 0.17917 | 0.2098  | 0.17777 | 0.18402 |
| YWHAH       | 0.6024   | 0.61589 | 0.71009 | 0.78266 | 0.89468 | 0.92099 |
| TRIM28      | 1.3807   | 1.87402 | 1.87791 | 2.02374 | 2.08652 | 2.06858 |
| DHX30       | 0.50746  | 0.53975 | 0.66049 | 0.68677 | 0.68636 | 0.66879 |
| CDK8        | 0.05707  | 0.03231 | 0.05109 | 0.05395 | 0.08587 | 0.08545 |
| CCNH        | 0.21571  | 0.22923 | 0.22138 | 0.25313 | 0.24565 | 0.27361 |
| RFK         | 0.07005  | 0.08681 | 0.08015 | 0.09871 | 0.10285 | 0.09647 |
| RABGGTB     | 0.36684  | 0.42855 | 0.41647 | 0.42485 | 0.42696 | 0.43217 |
| PLK4        | 0.05711  | 0.06566 | 0.06414 | 0.07617 | 0.07167 | 0.09208 |
| CYP4B1      | 0.01818  | 0.02212 | 0.01479 | 0.0281  | 0.01726 | 0.02568 |
| TP53BP2     | 0.03717  | 0.10155 | 0.05043 | 0.05624 | 0.04215 | 0.05094 |
| NVL         | 0.55836  | 0.51672 | 0.60485 | 0.74844 | 0.7723  | 0.71895 |
| ARF1        | 2.00879  | 2.18815 | 1.98132 | 2.5784  | 2.26177 | 2.52116 |
| PLK2        | 0.10776  | 0.09893 | 0.10267 | 0.08395 | 0.08675 | 0.06842 |
| GZMA        | 0.02178  | 0.03853 | 0.02386 | 0.03074 | 0.02722 | 0.04392 |
| NOLA2       | 0.08466  | 0.28532 | 0.1057  | 0.08982 | 0.08696 | 0.12136 |
| HMBS        | 0.14167  | 0.17194 | 0.20812 | 0.23694 | 0.22459 | 0.22428 |
| ITIH2       | 0.02044  | 0.01754 | 0.01454 | 0.02624 | 0.02377 | 0.02061 |
| SACS        | 0.0567   | 0.01686 | 0.0606  | 0.06366 | 0.05251 | 0.04668 |
| GABPA       | 0.07962  | 0.09354 | 0.08863 | 0.11663 | 0.12727 | 0.12222 |
| ETS2        | 0.07303  | 0.05037 | 0.07189 | 0.07592 | 0.0802  | 0.08526 |
| IL8RA       | 0.09453  | 0.09742 | 0.11416 | 0.10699 | 0.13543 | 0.11622 |
| API5        | 0.02862  | 0.02842 | 0.04765 | 0.08883 | 0.06094 | 0.06229 |
| n.a.        | 0.40678  | 0.42398 | 0.465   | 0.43825 | 0.49702 | 0.48593 |
| ICT1        | 0.16573  | 0.14977 | 0.35205 | 0.20532 | 0.19027 | 0.23773 |
| DFFB        | 0.15107  | 0.14199 | 0.14034 | 0.15898 | 0.15168 | 0.16167 |
| USP7        | 0.36369  | 0.36912 | 0.36096 | 0.39524 | 0.40234 | 0.40644 |
| PAP         | 0.10496  | 0.10761 | 0.12671 | 0.12652 | 0.11887 | 0.12261 |
| BSG         | 0.12811  | 0.1104  | 0.10811 | 0.13194 | 0.14306 | 0.13585 |
| YIF1        | 0.36154  | 0.45125 | 0.46066 | 0.5256  | 0.49569 | 0.49774 |
| POLE        | 0.07269  | 0.07966 | 0.14669 | 0.08667 | 0.09579 | 0.11641 |
|             | 0.02557  | 0.00917 | 0.02743 | 0.06629 | 0.02816 | 0.03703 |

| HGNC Symbol | Ex_2Tc   | Ex_1 5Tc | Ex_1Tc   | Ex_0 5Tc | Ex_0Tc   |
|-------------|----------|----------|----------|----------|----------|
| MYC         | 24.24792 | 29.84727 | 48.72814 | 70.64298 | 99.90093 |
| CACNA1G     | 0.03884  | 0.04056  | 0.0249   | 0.0383   | 0.05098  |
| NME1        | 6.11381  | 6.93531  | 7.89053  | 9.11514  | 11.2004  |
| ADCY2       | 0.01927  | 0.02214  | 0.02956  | 0.02524  | 0.05037  |
| C4orf9      | 0.06811  | 0.07043  | 0.07172  | 0.07933  | 0.08534  |
| FKBP5       | 0.12327  | 0.17882  | 0.18407  | 0.21477  | 0.22532  |
| CRKL        | 0.06464  | 0.03174  | 0.04129  | 0.0495   | 0.04769  |
| RFC5        | 0.05806  | 0.0701   | 0.0784   | 0.0674   | 0.06622  |
| PPP2CA      | 0.1188   | 0.16335  | 0.18774  | 0.27539  | 0.37333  |
| TIMM8A      | 0.03355  | 0.0617   | 0.05448  | 0.04957  | 0.03746  |
| n.a.        | 0.03668  | 0.03476  | 0.05453  | 0.04148  | 0.0439   |
| MAD2L1      | 0.04222  | 0.03828  | 0.04161  | 0.04277  | 0.03763  |
| MRPL12      | 1.35803  | 1.50382  | 1.5149   | 1.85243  | 1.79529  |
| NME1        | 8.78296  | 9.95429  | 11.4959  | 12.52977 | 16.60843 |
| METTL1      | 0.16941  | 0.19865  | 0.17531  | 0.22317  | 0.26762  |
| SLC7A5      | 0.2626   | 0.2141   | 0.2441   | 0.3273   | 0.53973  |
| SRM         | 3.46106  | 3.81465  | 4.60774  | 5.88457  | 6.52146  |
| IL1B        | 0.47009  | 0.64286  | 0.63565  | 0.72582  | 0.77263  |
| PAICS       | 1.48973  | 1.59328  | 1.95943  | 2.23747  | 2.40668  |
| TOMM40      | 1.04629  | 1.26929  | 1.36004  | 1.59827  | 2.04866  |
| PYCR1       | 0.71494  | 0.87215  | 1.0356   | 1.3967   | 2.02993  |
| UMPK        | 0.61388  | 0.72765  | 0.66725  | 0.79878  | 0.85444  |
| LRP8        | 0.09823  | 0.09671  | 0.12233  | 0.12144  | 0.14263  |
| DUSP14      | 0.1534   | 0.03635  | 0.04079  | 0.04512  | 0.05757  |
| METAP1      | 0.10463  | 0.10231  | 0.12391  | 0.11613  | 0.1106   |
| ABCE1       | 0.14939  | 0.13549  | 0.15696  | 0.16863  | 0.22944  |
| PA2G4       | 9.2119   | 12.0504  | 13.89182 | 16.71221 | 17.31241 |
| BOP1        | 0.71181  | 0.98384  | 1.00474  | 1.28254  | 1.52391  |
| RANBP1      | 4.18971  | 4.86993  | 5.57516  | 6.15064  | 7.19984  |
| CTPS        | 0.31682  | 0.37337  | 0.3801   | 0.41418  | 0.46139  |
| TRAP1       | 1.94524  | 2.34088  | 2.86386  | 3.556    | 4.59865  |
| HSPD1       | 5.33401  | 6.8202   | 7.58756  | 9.28963  | 10.57588 |
| PFAS        | 0.32968  | 0.39351  | 0.44004  | 0.48149  | 0.46104  |
| TEAD4       | 0.22022  | 0.25596  | 0.29925  | 0.38479  | 0.48777  |
| MIF         | 19.16197 | 22.75153 | 23.46172 | 24.19818 | 31.73168 |
| VAR2        | 1.0973   | 1.42561  | 1.4329   | 1.82111  | 2.09228  |
| CENTG1      | 2.58864  | 3.34169  | 3.82157  | 4.57701  | 6.24183  |
| DSCR2       | 1.31659  | 1.44559  | 1.71837  | 2.05897  | 2.40918  |
| JAG2        | 0.50935  | 0.63113  | 0.75629  | 0.88819  | 1.12428  |
| PRKAR1B     | 0.19804  | 0.19583  | 0.24432  | 0.2971   | 0.30204  |
| n.a.        | 0.07719  | 0.09052  | 0.10752  | 0.12246  | 0.15445  |
| MATK        | 0.19028  | 0.18185  | 0.2606   | 0.30828  | 0.33483  |
| IARS        | 2.34668  | 2.32211  | 2.75536  | 3.4562   | 4.09841  |
| GAL         | 0.37798  | 0.51008  | 0.53362  | 0.72777  | 0.92394  |
| MCAM        | 0.03483  | 0.0495   | 0.06283  | 0.05132  | 0.09111  |
| CAD         | 0.31569  | 0.39535  | 0.36994  | 0.51115  | 0.56246  |
| FH          | 2.43855  | 2.84974  | 3.46324  | 3.95112  | 4.13769  |
| SRPK1       | 0.83915  | 0.87489  | 1.12343  | 1.18884  | 1.52077  |
| NEFH        | 0.0634   | 0.07343  | 0.10049  | 0.09351  | 0.07361  |
| NP          | 0.65157  | 0.8101   | 0.98444  | 1.1093   | 1.32796  |
| AHCY        | 1.69598  | 1.76517  | 2.23913  | 2.35751  | 2.979    |
| POLD2       | 0.1553   | 0.1963   | 0.19288  | 0.21385  | 0.26951  |
| C1QBP       | 4.99316  | 5.55995  | 6.30976  | 7.26831  | 8.1798   |
| CAMKK2      | 0.39591  | 0.45582  | 0.52487  | 0.58     | 0.57179  |
| n.a.        | 0.25729  | 0.31906  | 0.38658  | 0.42096  | 0.47316  |
| BYSL        | 0.22934  | 0.2954   | 0.29529  | 0.34102  | 0.37958  |
| NUP155      | 0.1308   | 0.12654  | 0.11253  | 0.12207  | 0.13338  |

| <b>HGNC Symbol</b> | <b>Ex_2Tc</b> | <b>Ex_1 5Tc</b> | <b>Ex_1Tc</b> | <b>Ex_0 5Tc</b> | <b>Ex_0Tc</b> |
|--------------------|---------------|-----------------|---------------|-----------------|---------------|
| IFRD2              | 0.69624       | 0.72125         | 0.88974       | 1.13615         | 1.31532       |
| MRPL3              | 0.82447       | 0.952           | 1.19507       | 1.30666         | 1.45727       |
| HSPE1              | 8.07346       | 8.22515         | 10.56405      | 11.8883         | 13.98806      |
| HSPE1              | 7.68753       | 8.22701         | 10.13275      | 11.81685        | 12.8846       |
| n.a.               | 0.1774        | 0.19251         | 0.21735       | 0.23547         | 0.26078       |
| EBNA1BP2           | 2.07532       | 2.52982         | 2.85928       | 2.98876         | 3.74663       |
| TNFRSF8            | 0.09502       | 0.1475          | 0.20366       | 0.26273         | 0.41426       |
| PRDX4              | 1.47968       | 1.84113         | 2.14581       | 2.51338         | 3.07336       |
| CSE1L              | 0.46118       | 0.45033         | 0.64102       | 0.66878         | 0.84092       |
| RPP40              | 0.14313       | 0.09977         | 0.08993       | 0.08949         | 0.1247        |
| n.a.               | 0.03542       | 0.0771          | 0.05116       | 0.05922         | 0.0608        |
| HRMT1L2            | 1.30027       | 1.49672         | 1.66707       | 2.34567         | 2.64623       |
| n.a.               | 0.08738       | 0.09297         | 0.05829       | 0.09968         | 0.15362       |
| n.a.               | 0.5821        | 0.7606          | 0.85698       | 1.04672         | 1.27818       |
| MADH4              | 0.45686       | 0.62083         | 0.69856       | 0.78066         | 0.84257       |
| IL9                | 1.23332       | 1.50689         | 1.62093       | 1.66557         | 1.72986       |
| PDCD11             | 0.36358       | 0.41181         | 0.40439       | 0.50033         | 0.60663       |
| HK2                | 0.08005       | 0.03996         | 0.05956       | 0.07294         | 0.06673       |
| PWP2H              | 0.5242        | 0.55855         | 0.62081       | 0.80532         | 0.83772       |
| n.a.               | 0.12961       | 0.18367         | 0.2152        | 0.20333         | 0.23753       |
| NOLC1              | 1.23518       | 1.18399         | 1.51559       | 1.69105         | 1.86501       |
| NOLC1              | 2.07927       | 2.56581         | 2.65577       | 3.10364         | 3.95233       |
| CCT2               | 8.01904       | 8.46872         | 10.58227      | 11.69279        | 13.00955      |
| DTYMK              | 0.68431       | 0.8545          | 0.84353       | 0.96483         | 0.99887       |
| HNRPAB             | 3.81878       | 4.14986         | 4.68133       | 5.41328         | 5.6115        |
| FASN               | 0.82981       | 0.94697         | 1.22436       | 1.59613         | 2.04446       |
| FASN               | 0.91508       | 0.94895         | 1.24627       | 1.63587         | 2.21456       |
| NMB                | 0.08132       | 0.12189         | 0.08947       | 0.1058          | 0.10026       |
| CHC1               | 0.08067       | 0.0855          | 0.10163       | 0.1256          | 0.12436       |
|                    | 0.24826       | 0.30016         | 0.35629       | 0.42537         | 0.46282       |
| KIAA0179           | 0.31357       | 0.38317         | 0.4107        | 0.42879         | 0.72517       |
| NTHL1              | 0.57001       | 0.73895         | 0.78379       | 0.91477         | 1.06995       |
| UNG                | 0.43232       | 0.4134          | 0.56625       | 0.65597         | 0.69971       |
| KIAA0020           | 1.76941       | 1.87983         | 2.44869       | 2.63156         | 3.20546       |
| n.a.               | 0.51254       | 0.54393         | 0.58716       | 0.60697         | 0.80429       |
| n.a.               | 0.85375       | 0.94036         | 1.00024       | 1.14491         | 1.28184       |
| POLE2              | 0.09803       | 0.13469         | 0.14501       | 0.1497          | 0.19262       |
| MTHFD1             | 1.43651       | 1.54327         | 1.71401       | 1.89954         | 2.00319       |
| NOL5A              | 1.94116       | 2.24268         | 2.628         | 2.70959         | 3.5047        |
| PRPS2              | 1.27711       | 1.29917         | 1.67293       | 1.84033         | 2.11056       |
| RUVBL2             | 1.42568       | 1.72487         | 1.92551       | 2.04062         | 2.28655       |
| GPI                | 1.3664        | 1.90657         | 1.87308       | 2.16928         | 2.52435       |
| n.a.               | 1.31801       | 1.65265         | 1.66221       | 1.91425         | 1.90581       |
| NPM3               | 0.40294       | 0.38559         | 0.51279       | 0.67992         | 0.76681       |
| n.a.               | 0.32914       | 0.37158         | 0.48373       | 0.55839         | 0.69126       |
| CDC20              | 0.55934       | 0.67395         | 0.64745       | 0.64784         | 0.69958       |
| n.a.               | 0.453         | 0.44056         | 0.54973       | 0.6581          | 0.69647       |
| PRKDC              | 0.06537       | 0.07227         | 0.07932       | 0.07263         | 0.08444       |
| CKS2               | 5.1553        | 5.25915         | 6.50381       | 6.17341         | 6.94295       |
| CSE1L              | 0.42094       | 0.5447          | 0.52608       | 0.6902          | 0.82152       |
| EEF1E1             | 0.35915       | 0.33568         | 0.42038       | 0.48496         | 0.55427       |
| HRMT1L2            | 1.54036       | 1.66038         | 2.16701       | 2.53097         | 2.96982       |
| n.a.               | 0.20801       | 0.25673         | 0.25631       | 0.28774         | 0.3178        |
| TST                | 0.11538       | 0.13389         | 0.14488       | 0.18067         | 0.17368       |
| DKC1               | 0.80763       | 0.9977          | 1.11326       | 1.22113         | 1.36612       |
| RAN                | 3.14648       | 2.78806         | 3.40072       | 3.27658         | 3.52985       |
| PDGFRA             | 0.13985       | 0.12858         | 0.26488       | 0.28408         | 0.47226       |

| HGNC Symbol | Ex_2Tc   | Ex_1 5Tc | Ex_1Tc   | Ex_0 5Tc | Ex_0Tc   |
|-------------|----------|----------|----------|----------|----------|
| CDK4        | 0.01905  | 0.0318   | 0.01398  | 0.03492  | 0.04831  |
| ALDH1B1     | 0.09498  | 0.10795  | 0.13216  | 0.1461   | 0.13973  |
| SORD        | 0.33978  | 0.39145  | 0.43105  | 0.54265  | 0.63649  |
| BDH         | 0.20924  | 0.29502  | 0.27414  | 0.27263  | 0.282    |
| GMPS        | 0.60525  | 0.71762  | 0.71469  | 0.74922  | 0.70356  |
| GPR30       | 0.42533  | 0.59571  | 0.69268  | 0.89245  | 1.02643  |
| PHB         | 4.15444  | 4.80394  | 5.17604  | 5.66164  | 5.80035  |
| STRA13      | 0.68811  | 0.77858  | 0.84822  | 0.99746  | 1.11061  |
| XPOT        | 0.4703   | 0.57895  | 0.69945  | 0.70916  | 0.87226  |
| SMN1        | 0.18958  | 0.21957  | 0.23967  | 0.29329  | 0.33405  |
| CHC1        | 1.10175  | 1.22578  | 1.48845  | 1.76851  | 1.72726  |
| PLK1        | 0.66592  | 0.71205  | 0.83276  | 1.04801  | 0.93357  |
| n.a.        | 0.14952  | 0.13231  | 0.16622  | 0.19995  | 0.2415   |
| AK2         | 1.64395  | 1.89703  | 2.15853  | 2.4034   | 2.95186  |
| n.a.        | 0.18651  | 0.17476  | 0.19063  | 0.20176  | 0.26131  |
| MGST1       | 0.26799  | 0.31006  | 0.35985  | 0.41725  | 0.56349  |
| CSDA        | 2.34255  | 2.89912  | 2.99681  | 3.47385  | 4.17057  |
| n.a.        | 0.33358  | 0.37368  | 0.43681  | 0.50967  | 0.66956  |
| ATP1B3      | 3.14361  | 3.19486  | 3.59428  | 4.15195  | 4.46027  |
| BCS1L       | 0.25842  | 0.31775  | 0.3567   | 0.43169  | 0.49858  |
| UNG         | 0.27909  | 0.29237  | 0.36465  | 0.41142  | 0.57422  |
| PBP         | 1.34674  | 1.69375  | 1.64039  | 1.90643  | 1.62101  |
| CDC6        | 0.16722  | 0.20932  | 0.25648  | 0.28751  | 0.27187  |
| CDC7        | 0.19247  | 0.18726  | 0.19752  | 0.22077  | 0.21367  |
| MTAP        | 0.13583  | 0.11265  | 0.15554  | 0.17048  | 0.17427  |
| ADSL        | 3.28601  | 4.07996  | 4.52733  | 5.20518  | 5.53405  |
| CDKN3       | 1.21157  | 1.12998  | 1.41594  | 1.51972  | 1.55193  |
| VRK1        | 1.18401  | 1.16311  | 1.35515  | 1.59065  | 1.47632  |
| WFDC2       | 0.15683  | 0.1616   | 0.21434  | 0.2209   | 0.27784  |
| GSPT1       | 0.88586  | 0.93868  | 1.06292  | 1.15313  | 1.26329  |
| SLC39A14    | 0.34747  | 0.36557  | 0.48662  | 0.54029  | 0.75221  |
| n.a.        | 0.4032   | 0.4349   | 0.48251  | 0.60714  | 0.7285   |
| RLN2        | 0.11147  | 0.12813  | 0.11962  | 0.15222  | 0.1874   |
| BAG2        | 0.23434  | 0.23341  | 0.24682  | 0.27032  | 0.34004  |
| HSD17B8     | 0.14954  | 0.20265  | 0.20179  | 0.26808  | 0.33104  |
| UCHL3       | 1.62551  | 1.63639  | 2.02267  | 2.43716  | 2.42739  |
| NME2        | 19.76906 | 22.15522 | 23.45902 | 27.55526 | 27.72588 |
| MRPS12      | 0.75553  | 0.86918  | 0.87729  | 0.97246  | 1.04972  |
| PCNA        | 1.96066  | 2.08068  | 2.3147   | 2.14963  | 2.43413  |
| DPH2L2      | 0.1906   | 0.23201  | 0.24574  | 0.28435  | 0.34142  |
| CCNB1       | 2.40568  | 2.50603  | 2.85089  | 2.84215  | 2.97671  |
| MC1R        | 1.48914  | 1.9685   | 2.24025  | 2.74683  | 3.34447  |
| SOD1        | 6.80314  | 6.94095  | 8.36967  | 9.68501  | 10.57298 |
| ATP5G3      | 7.58213  | 9.08059  | 10.56587 | 11.03314 | 10.65712 |
| CCT3        | 4.1085   | 4.8961   | 5.01829  | 5.41222  | 5.93334  |
| RFC4        | 0.71981  | 0.74587  | 0.92911  | 0.95374  | 1.11705  |
| CDC25A      | 0.08758  | 0.10902  | 0.11749  | 0.12942  | 0.14418  |
| FRDA        | 0.70202  | 0.76482  | 0.88079  | 0.96853  | 1.08787  |
| SNRPD1      | 0.32509  | 0.33691  | 0.31765  | 0.39184  | 0.43835  |
| CHAF1A      | 0.26792  | 0.27891  | 0.30055  | 0.33206  | 0.36495  |
| PRDX2       | 1.99601  | 2.78608  | 2.72895  | 3.14471  | 3.66851  |
| BUB1        | 1.08913  | 1.16927  | 1.30305  | 1.33758  | 1.28601  |
| CDC2        | 2.02484  | 1.92393  | 2.16898  | 1.97944  | 1.48605  |
| POLR1C      | 0.44135  | 0.48978  | 0.52734  | 0.54711  | 0.7238   |
| SLC19A1     | 0.23218  | 0.1482   | 0.16119  | 0.18313  | 0.19097  |
| TOMM20      | 1.33017  | 1.4072   | 1.6301   | 2.11455  | 2.4955   |
| MMP3        | 0.12347  | 0.16152  | 0.15694  | 0.17889  | 0.2128   |

| HGNC Symbol | Ex_2Tc   | Ex_1 5Tc | Ex_1Tc  | Ex_0 5Tc | Ex_0Tc   |
|-------------|----------|----------|---------|----------|----------|
| UBE2C       | 3.36429  | 4.01794  | 4.11854 | 4.12627  | 4.44263  |
| PTPN2       | 0.15689  | 0.17791  | 0.21939 | 0.30071  | 0.40489  |
| RUVBL1      | 0.76424  | 0.82609  | 1.05658 | 1.1069   | 1.37199  |
| TYMS        | 1.32287  | 1.38644  | 1.54584 | 1.44259  | 1.5199   |
| DDX10       | 0.63244  | 0.62987  | 0.75811 | 0.87782  | 1.05318  |
| TUFM        | 3.41112  | 4.28634  | 4.74474 | 5.04342  | 6.40778  |
| AURKB       | 0.77315  | 0.82746  | 0.83034 | 0.84225  | 1.00015  |
| RRS1        | 0.24494  | 0.26173  | 0.31274 | 0.31791  | 0.3786   |
| GEMIN4      | 0.61377  | 0.71027  | 0.72367 | 0.79815  | 0.92151  |
| PTMA        | 18.25454 | 19.79934 | 21.6746 | 25.10207 | 23.50425 |
| CYP51A1     | 0.29174  | 0.32117  | 0.43318 | 0.51267  | 0.70985  |
| ARHGEF5     | 0.0387   | 0.04063  | 0.06562 | 0.09548  | 0.08864  |
| KIAA0690    | 0.38413  | 0.42386  | 0.49553 | 0.57687  | 0.75076  |
| VDAC1       | 0.96058  | 0.8646   | 1.15698 | 1.34615  | 1.52361  |
| DDX1        | 2.07413  | 2.29972  | 2.81213 | 3.24941  | 3.20796  |
| SCAMP1      | 0.17419  | 0.24509  | 0.19472 | 0.23668  | 0.24135  |
| DDX18       | 0.97726  | 0.95373  | 1.24436 | 1.23641  | 1.4686   |
| PES1        | 0.96553  | 1.10002  | 1.1139  | 1.37752  | 1.54109  |
| RANGAP1     | 0.22673  | 0.2129   | 0.28748 | 0.28701  | 0.33228  |
| APEX1       | 0.38368  | 0.47725  | 0.43338 | 0.46589  | 0.5477   |
| MYBL2       | 0.483    | 0.45735  | 0.58206 | 0.66319  | 0.61031  |
| USP10       | 0.18883  | 0.22145  | 0.24302 | 0.23664  | 0.25182  |
| n.a.        | 0.10074  | 0.11656  | 0.12604 | 0.14052  | 0.15301  |
| RPA3        | 0.50578  | 0.42017  | 0.49986 | 0.50067  | 0.59807  |
| CXCL12      | 0.0911   | 0.10214  | 0.10839 | 0.11804  | 0.13436  |
| n.a.        | 0.08234  | 0.10376  | 0.11238 | 0.12507  | 0.17815  |
| MCM3        | 0.52896  | 0.48648  | 0.70057 | 1.04342  | 1.18707  |
| GMNN        | 0.34774  | 0.3462   | 0.34768 | 0.38491  | 0.46141  |
| HSPA9B      | 1.87686  | 2.19851  | 2.70005 | 2.67253  | 2.72019  |
| TCERG1      | 0.40361  | 0.4188   | 0.46269 | 0.51519  | 0.50344  |
| RNU3IP2     | 0.48719  | 0.56848  | 0.58731 | 0.78711  | 0.98894  |
| SFRS7       | 2.23966  | 2.19488  | 2.57414 | 2.51714  | 2.66668  |
| MSH6        | 1.75403  | 1.81995  | 2.16452 | 2.14977  | 2.7066   |
| CENPF       | 0.74042  | 0.72552  | 0.73309 | 0.72277  | 0.84559  |
| MXI1        | 0.15637  | 0.15752  | 0.17875 | 0.21003  | 0.2049   |
| AMD1        | 0.59062  | 0.58006  | 0.75787 | 0.73383  | 0.79837  |
| ELK1        | 0.381    | 0.39083  | 0.48623 | 0.51957  | 0.60625  |
| ILF3        | 0.8122   | 0.96267  | 0.98374 | 1.27049  | 1.33706  |
| TFDP1       | 0.64975  | 0.6318   | 0.74569 | 0.68508  | 0.61327  |
| n.a.        | 0.47424  | 0.50685  | 0.61129 | 0.56596  | 0.63569  |
| TOP2A       | 0.418    | 0.40405  | 0.51316 | 0.45964  | 0.39245  |
| EIF5A       | 0.63961  | 0.67164  | 0.7513  | 0.66803  | 0.70553  |
| n.a.        | 0.06333  | 0.06207  | 0.08042 | 0.09956  | 0.12595  |
| n.a.        | 0.5774   | 0.69666  | 0.77793 | 0.85474  | 0.95649  |
| ATIC        | 4.14963  | 4.17419  | 5.07737 | 5.50918  | 6.33753  |
| ATIC        | 1.63835  | 1.7938   | 2.00291 | 1.94483  | 2.11565  |
| PEX5        | 0.18257  | 0.2065   | 0.26316 | 0.26033  | 0.38525  |
| TAF4B       | 0.15016  | 0.14181  | 0.18233 | 0.18318  | 0.19452  |
| HDGF        | 0.7451   | 0.83795  | 0.88981 | 1.1168   | 1.30349  |
| HDGF        | 1.8065   | 2.01806  | 2.27517 | 2.74627  | 2.76009  |
| ILF2        | 2.80284  | 3.25842  | 3.32981 | 3.2043   | 3.50766  |
| CCNA2       | 0.29566  | 0.25827  | 0.32162 | 0.26761  | 0.26707  |
| MDH2        | 1.69219  | 1.71947  | 1.97619 | 2.38708  | 2.65784  |
| PEG10       | 0.05761  | 0.04601  | 0.0699  | 0.09363  | 0.16883  |
| PPRC1       | 0.16901  | 0.18988  | 0.22062 | 0.25253  | 0.29363  |
| SSRP1       | 1.5992   | 1.85959  | 1.98328 | 2.29312  | 2.63288  |
| PTK9        | 0.01621  | 0.02364  | 0.0271  | 0.0613   | 0.07004  |

| HGNC Symbol | Ex_2Tc  | Ex_1 5Tc | Ex_1Tc   | Ex_0 5Tc | Ex_0Tc   |
|-------------|---------|----------|----------|----------|----------|
| ACSL1       | 0.413   | 0.43228  | 0.63253  | 0.69514  | 0.84662  |
| PFKM        | 0.57168 | 0.77548  | 0.79903  | 0.9722   | 1.28479  |
| HNRPD       | 0.76946 | 0.79725  | 0.91693  | 0.90634  | 1.11094  |
| RPIA        | 0.43947 | 0.4735   | 0.55772  | 0.59595  | 0.76191  |
| SLC16A1     | 0.03226 | 0.03966  | 0.03012  | 0.06814  | 0.07122  |
| KCNJ6       | 0.92873 | 0.97798  | 1.04534  | 1.1028   | 1.20519  |
| SFRS2       | 8.52023 | 8.60066  | 9.62945  | 11.31289 | 11.66946 |
| PRKCI       | 0.08743 | 0.18162  | 0.1517   | 0.15839  | 0.15649  |
| POLR2H      | 0.59115 | 0.70837  | 0.69794  | 0.71845  | 0.98433  |
| ABCE1       | 0.08998 | 0.10053  | 0.10629  | 0.10439  | 0.13369  |
| MELK        | 0.17519 | 0.16948  | 0.17788  | 0.16515  | 0.19187  |
| DDX21       | 0.12067 | 0.11735  | 0.09493  | 0.13041  | 0.198    |
| SSSCA1      | 0.76365 | 0.742    | 0.8163   | 0.8583   | 0.98012  |
| n.a.        | 0.83283 | 0.93332  | 1.08143  | 1.14213  | 1.44032  |
| HSPCA       | 0.74752 | 0.82847  | 0.79377  | 0.74287  | 0.77818  |
| DEAF1       | 0.57331 | 0.62771  | 0.73992  | 0.87263  | 1.10693  |
| n.a.        | 0.35786 | 0.43486  | 0.50264  | 0.63429  | 0.88654  |
| EIF1AX      | 0.14515 | 0.13607  | 0.18423  | 0.16415  | 0.21114  |
| n.a.        | 5.47967 | 5.41279  | 6.07723  | 6.80067  | 8.87019  |
| n.a.        | 0.22512 | 0.23164  | 0.28056  | 0.29026  | 0.30982  |
| SF3A3       | 0.95964 | 0.97495  | 1.314    | 1.32029  | 1.32825  |
| n.a.        | 0.0334  | 0.03923  | 0.0414   | 0.04613  | 0.06509  |
| AK2         | 0.42784 | 0.47774  | 0.46816  | 0.55975  | 0.5263   |
| PLAUR       | 0.04073 | 0.07203  | 0.0412   | 0.10451  | 0.08515  |
| SCARB1      | 0.55287 | 0.65078  | 0.6805   | 0.9121   | 0.95107  |
| MCM2        | 1.6353  | 2.06354  | 1.91521  | 2.22915  | 2.37309  |
| EXOSC7      | 0.39004 | 0.44241  | 0.49285  | 0.56998  | 0.56191  |
| KHSRP       | 4.58697 | 5.15101  | 5.89931  | 6.48452  | 6.87213  |
| NUDC        | 1.35232 | 1.51243  | 1.52203  | 1.80667  | 1.979    |
| CGRRF1      | 0.38906 | 0.49266  | 0.51797  | 0.60477  | 0.64014  |
| APEX1       | 0.69477 | 0.88629  | 0.9131   | 0.94862  | 1.13259  |
| GARS        | 2.04467 | 2.40504  | 2.78706  | 3.06658  | 3.78534  |
| EIF3S9      | 2.17339 | 2.74299  | 2.88262  | 3.11746  | 3.63399  |
| IMPDH1      | 0.33611 | 0.37229  | 0.38842  | 0.42722  | 0.57396  |
| VEGF        | 0.01851 | 0.02435  | 0.02956  | 0.03191  | 0.06676  |
| TFDP2       | 0.17431 | 0.19992  | 0.23217  | 0.28635  | 0.3217   |
| PRDX1       | 8.919   | 9.7041   | 10.77956 | 11.24282 | 12.41687 |
| SCO2        | 0.3877  | 0.52976  | 0.48252  | 0.47939  | 0.45808  |
| TUBG1       | 0.2007  | 0.25923  | 0.26766  | 0.27755  | 0.34464  |
| MYCN        | 0.1278  | 0.15888  | 0.17561  | 0.19629  | 0.24342  |
| ABL2        | 0.03297 | 0.21292  | 0.06345  | 0.06072  | 0.08004  |
| SLC20A1     | 0.56647 | 0.67221  | 0.65282  | 0.74459  | 0.75507  |
| CDKN2B      | 0.0258  | 0.04076  | 0.04392  | 0.05458  | 0.05918  |
| n.a.        | 0.7397  | 0.86416  | 0.89634  | 1.05505  | 1.16135  |
| FANCG       | 0.40597 | 0.47403  | 0.47387  | 0.50725  | 0.55289  |
| PMPCA       | 1.71753 | 2.01126  | 2.06708  | 2.35937  | 2.7174   |
| PSMC3       | 0.897   | 1.03036  | 1.04835  | 1.17441  | 1.18331  |
| MCM7        | 2.46905 | 2.93816  | 2.7977   | 3.19883  | 3.48309  |
| ABCA3       | 0.12775 | 0.15626  | 0.16162  | 0.23113  | 0.28623  |
| EIF4EBP1    | 0.68879 | 0.94331  | 0.96184  | 1.07101  | 1.36111  |
| TNFRSF4     | 0.0465  | 0.05061  | 0.05679  | 0.07146  | 0.07991  |
| SRP72       | 0.85553 | 1.067    | 1.11187  | 1.21427  | 1.26575  |
| ALG3        | 0.21911 | 0.3214   | 0.2746   | 0.3064   | 0.40692  |
| CKS1B       | 0.16676 | 0.20484  | 0.23317  | 0.26069  | 0.28174  |
| NSEP1       | 7.62913 | 8.95213  | 9.11721  | 8.62483  | 9.06543  |
| FARSLA      | 0.60217 | 0.74089  | 0.71842  | 0.91986  | 0.8022   |
| PRIM1       | 0.19345 | 0.2418   | 0.25797  | 0.27493  | 0.25425  |

| HGNC Symbol | Ex_2Tc   | Ex_1 5Tc | Ex_1Tc   | Ex_0 5Tc | Ex_0Tc   |
|-------------|----------|----------|----------|----------|----------|
| TBL3        | 0.8483   | 0.9743   | 1.0362   | 1.08598  | 1.24568  |
| JUND        | 0.47954  | 0.49539  | 0.56673  | 0.60808  | 0.63482  |
| PTBP1       | 0.99233  | 0.70978  | 0.86113  | 0.91497  | 0.98554  |
| MRE11A      | 0.24558  | 0.26381  | 0.31722  | 0.30088  | 0.34112  |
| HSPA5       | 1.13191  | 1.4411   | 1.63876  | 1.63927  | 1.5961   |
| OAT         | 0.17694  | 0.17637  | 0.2325   | 0.25902  | 0.25971  |
| TFRC        | 1.86784  | 1.83369  | 2.26208  | 2.27588  | 2.62262  |
| SHMT1       | 0.07662  | 0.07741  | 0.08488  | 0.10582  | 0.11367  |
| CLNS1A      | 2.94697  | 2.93329  | 3.49117  | 3.51993  | 4.1683   |
| SEMA3C      | 0.03225  | 0.02185  | 0.03735  | 0.04135  | 0.05543  |
| MCAM        | 0.13376  | 0.13348  | 0.16153  | 0.17157  | 0.20379  |
| MAPKAPK5    | 0.68063  | 0.7446   | 0.82051  | 0.9224   | 0.95781  |
| SIP1        | 0.10179  | 0.08371  | 0.1077   | 0.1123   | 0.13733  |
| NF2         | 0.18299  | 0.18833  | 0.21727  | 0.21204  | 0.22636  |
| SLC1A5      | 0.11374  | 0.11486  | 0.14085  | 0.15597  | 0.23719  |
| PSMA2       | 2.22921  | 2.28039  | 2.46698  | 2.7031   | 2.88663  |
| RAD51C      | 0.81667  | 0.87661  | 0.99725  | 1.14806  | 1.02325  |
| CTSC        | 0.19491  | 0.17632  | 0.21101  | 0.21985  | 0.27647  |
| HSPA8       | 4.74504  | 4.58531  | 5.93465  | 5.512    | 6.10911  |
| n.a.        | 0.0706   | 0.066    | 0.08565  | 0.09517  | 0.09867  |
| IGFBP2      | 0.83107  | 1.06304  | 1.45876  | 2.01584  | 2.25871  |
| DARS        | 0.47037  | 0.42532  | 0.48626  | 0.54127  | 0.66704  |
| UCHL3       | 0.81807  | 0.7712   | 0.98907  | 1.03573  | 1.25945  |
| GTF3A       | 2.95301  | 3.239    | 3.47028  | 3.72058  | 4.17885  |
| RPL5        | 19.18486 | 18.52295 | 19.29822 | 18.70064 | 23.20047 |
| AMD1        | 0.20084  | 0.17584  | 0.25985  | 0.22215  | 0.27684  |
| HSPA1A      | 0.04366  | 0.04195  | 0.0486   | 0.04562  | 0.05363  |
| SYNGR3      | 0.21623  | 0.20406  | 0.29813  | 0.37389  | 0.48112  |
| NINJ1       | 0.02274  | 0.03968  | 0.05861  | 0.07701  | 0.10792  |
| SNRPA1      | 1.64999  | 1.95082  | 2.16575  | 2.23876  | 2.46752  |
| TAF9        | 1.31757  | 1.40119  | 1.65683  | 1.69205  | 1.69667  |
| SYNCRIP     | 0.71953  | 0.65484  | 0.71075  | 0.88296  | 0.83826  |
| n.a.        | 0.60823  | 0.60445  | 0.69363  | 0.80758  | 0.89184  |
| ITGB3BP     | 0.31548  | 0.26129  | 0.31677  | 0.30508  | 0.39017  |
| PTPRF       | 0.07303  | 0.07836  | 0.09154  | 0.13734  | 0.15703  |
| CHEK1       | 0.17149  | 0.1529   | 0.17902  | 0.18064  | 0.16646  |
| TCEB1       | 2.38032  | 2.49266  | 3.13875  | 3.29309  | 3.34689  |
| n.a.        | 0.52234  | 0.52113  | 0.64072  | 0.60504  | 0.73026  |
| VBP1        | 0.66888  | 0.63986  | 0.70568  | 0.7647   | 0.78581  |
| BUB1B       | 0.20965  | 0.21384  | 0.26944  | 0.31156  | 0.33784  |
| RACGAP1     | 0.49562  | 0.45465  | 0.51721  | 0.51455  | 0.54411  |
| AK3         | 0.06097  | 0.05311  | 0.07359  | 0.09413  | 0.09382  |
| HNRPF       | 4.6523   | 4.92339  | 5.14131  | 5.39316  | 5.86556  |
| PDAP1       | 0.22301  | 0.19217  | 0.26961  | 0.27825  | 0.25656  |
| SELE        | 0.13297  | 0.13154  | 0.13939  | 0.16066  | 0.16044  |
| n.a.        | 0.11619  | 0.11881  | 0.1202   | 0.15657  | 0.15187  |
| RCN1        | 0.0288   | 0.03503  | 0.00233  | 0.03435  | 0.04146  |
| GLDC        | 0.09034  | 0.16125  | 0.13191  | 0.15125  | 0.17052  |
| PMS1        | 0.05391  | 0.06065  | 0.04397  | 0.06448  | 0.06121  |
| PFKP        | 0.44217  | 0.46252  | 0.52239  | 0.65069  | 0.63521  |
| PDCD2       | 0.20546  | 0.23577  | 0.23611  | 0.28151  | 0.29829  |
| MGST2       | 0.44407  | 0.43265  | 0.48529  | 0.59354  | 0.66153  |
| NDUFB7      | 1.71131  | 1.72897  | 1.87853  | 2.04702  | 2.19851  |
| G22P1       | 1.59749  | 1.81578  | 1.8452   | 1.88312  | 2.14065  |
| n.a.        | 0.31281  | 0.38017  | 0.39287  | 0.44633  | 0.52599  |
| PBEF1       | 0.03872  | 0.053    | 0.04503  | 0.06829  | 0.07496  |
| TBL2        | 0.16468  | 0.16454  | 0.18646  | 0.21359  | 0.21984  |



| HGNC Symbol | Ex_2Tc  | Ex_1 5Tc | Ex_1Tc  | Ex_0 5Tc | Ex_0Tc  |
|-------------|---------|----------|---------|----------|---------|
| GCN5L2      | 0.13282 | 0.13146  | 0.10175 | 0.18789  | 0.18534 |
| CDK2AP1     | 0.8331  | 0.78834  | 0.90896 | 1.11478  | 1.29921 |
| NOL1        | 0.41097 | 0.40801  | 0.47053 | 0.50471  | 0.64824 |
| SLC29A1     | 0.52977 | 0.50567  | 0.6406  | 0.68806  | 0.75186 |
| BNIP1       | 0.07094 | 0.06198  | 0.06822 | 0.08712  | 0.07946 |
| DBN1        | 0.1587  | 0.1775   | 0.14313 | 0.22435  | 0.27242 |
| EIF4G1      | 0.57713 | 0.65281  | 0.65961 | 0.78447  | 0.8319  |
| B4GALT2     | 0.08104 | 0.07107  | 0.04672 | 0.10527  | 0.12641 |
| TMEM5       | 0.48601 | 0.53406  | 0.60559 | 0.69337  | 0.76231 |
| FVT1        | 0.02367 | 0.02267  | 0.02525 | 0.04379  | 0.05905 |
| ETF1        | 0.11574 | 0.09698  | 0.06041 | 0.10667  | 0.1392  |
| ATF4        | 2.4496  | 3.07457  | 3.14706 | 3.86149  | 4.48449 |
| ILF3        | 0.43332 | 0.40611  | 0.39689 | 0.49225  | 0.56261 |
| RAMP1       | 0.11996 | 0.1208   | 0.1456  | 0.20485  | 0.21617 |
| n.a.        | 0.65641 | 0.75097  | 0.77491 | 0.87503  | 0.95531 |
| ADCY3       | 0.35233 | 0.39367  | 0.41619 | 0.53237  | 0.68068 |
| AFG3L2      | 0.68129 | 0.84182  | 0.85973 | 0.99128  | 1.12333 |
| PRPS1       | 0.09552 | 0.0975   | 0.10486 | 0.12639  | 0.15676 |
| OPRS1       | 0.05481 | 0.0662   | 0.04723 | 0.09442  | 0.12118 |
| TOMM70A     | 0.12153 | 0.1213   | 0.11459 | 0.14995  | 0.21198 |
| APRT        | 1.80053 | 1.96806  | 1.85728 | 2.26824  | 2.13565 |
| FGFR4       | 0.03075 | 0.03737  | 0.04571 | 0.06619  | 0.09317 |
| DEFA6       | 0.03636 | 0.05688  | 0.04826 | 0.07645  | 0.06845 |
| ZNF9        | 0.12664 | 0.13327  | 0.07805 | 0.1096   | 0.14434 |
| RAC3        | 0.01892 | 0.03341  | 0.00253 | 0.03825  | 0.0551  |
| WNT10B      | 0.04331 | 0.05209  | 0.0211  | 0.04829  | 0.0662  |
| NFRKB       | 0.05802 | 0.05712  | 0.06663 | 0.09415  | 0.0983  |
| CDK5R2      | 0.01977 | 0.02672  | 0.03046 | 0.04325  | 0.0468  |
| CYCS        | 0.04679 | 0.04367  | 0.00666 | 0.05166  | 0.06299 |
| YES1        | 0.14329 | 0.17087  | 0.21994 | 0.30119  | 0.34947 |
| DLEU1       | 0.29748 | 0.33055  | 0.36177 | 0.38917  | 0.42903 |
| BNIP3       | 0.65478 | 0.72001  | 0.8345  | 1.02475  | 1.29219 |
| RAD23A      | 1.08931 | 1.1505   | 1.3093  | 1.41418  | 1.56273 |
|             | 0.03309 | 0.01526  | 0.02821 | 0.03459  | 0.03671 |
| UBE2G2      | 0.51641 | 0.49417  | 0.5566  | 0.53975  | 0.6838  |
| KCNQ3       | 0.02433 | 0.02477  | 0.02979 | 0.02376  | 0.04783 |
| MTA1        | 0.40323 | 0.37908  | 0.46176 | 0.47771  | 0.57475 |
| LIG3        | 0.08358 | 0.11714  | 0.10982 | 0.13836  | 0.16639 |
| ITGA2B      | 0.04168 | 0.04385  | 0.0464  | 0.05039  | 0.06462 |
| TOMM34      | 0.05509 | 0.0453   | 0.03814 | 0.04147  | 0.05675 |
| ITIH4       | 0.09355 | 0.1123   | 0.10736 | 0.10413  | 0.16828 |
| POLD1       | 0.63931 | 0.70229  | 0.71966 | 0.77523  | 0.91355 |
| IKBKAP      | 0.20275 | 0.17248  | 0.22522 | 0.21534  | 0.30201 |
| ASNS        | 0.07014 | 0.09158  | 0.08551 | 0.10053  | 0.13627 |
| MX1         | 0.01735 | 0.00587  | 0.01501 | 0.01065  | 0.05824 |
| XRCC5       | 0.10487 | 0.09902  | 0.09077 | 0.08772  | 0.10281 |
| XPO1        | 0.95508 | 0.90264  | 0.97384 | 0.99533  | 1.14862 |
| RAD54L      | 0.1052  | 0.11559  | 0.12469 | 0.12027  | 0.13486 |
| PTHLH       | 0.00873 | 0.00154  | 0.04149 | 0.01482  | 0.10204 |
| MSH2        | 0.40747 | 0.41413  | 0.41869 | 0.42403  | 0.46078 |
| CDKL1       | 0.09252 | 0.08355  | 0.10905 | 0.09688  | 0.12688 |
| ADA         | 0.21566 | 0.24246  | 0.25936 | 0.2909   | 0.37573 |
| n.a.        | 0.3438  | 0.37601  | 0.40494 | 0.44973  | 0.58308 |
| TGFB1       | 0.00124 | 0.00101  | 0.00147 | 0.00081  | 0.04021 |
| NPTX2       | 0.00807 | 0.00176  | 0.00777 | 0.00745  | 0.07305 |
| BAG1        | 0.54486 | 0.58475  | 0.63882 | 0.62761  | 0.81701 |
| BAG1        | 0.72789 | 0.79611  | 0.82337 | 0.83715  | 1.1148  |

| HGNC Symbol | Ex_2Tc  | Ex_1 5Tc | Ex_1Tc  | Ex_0 5Tc | Ex_0Tc  |
|-------------|---------|----------|---------|----------|---------|
| SHB         | 0.14096 | 0.13969  | 0.14985 | 0.19819  | 0.20588 |
| EIF3S10     | 0.5096  | 0.52184  | 0.56565 | 0.57923  | 0.64336 |
| HTATIP2     | 0.02861 | 0.01702  | 0.02495 | 0.02406  | 0.0474  |
| CALCA       | 0.07418 | 0.05426  | 0.04326 | 0.05465  | 0.06876 |
| C6orf108    | 1.69303 | 1.74884  | 1.84937 | 1.90262  | 2.20931 |
| ACY1        | 0.10127 | 0.15033  | 0.13672 | 0.15939  | 0.20006 |
| PASK        | 0.03819 | 0.04483  | 0.04568 | 0.06544  | 0.0767  |
| CEBPZ       | 0.52228 | 0.53035  | 0.63492 | 0.62079  | 0.76691 |
| RAP1A       | 0.07335 | 0.07893  | 0.09686 | 0.11538  | 0.14379 |
| NID         | 0.01435 | 0.02132  | 0.01482 | 0.01265  | 0.04051 |
| IDE         | 0.2261  | 0.21025  | 0.26939 | 0.25565  | 0.30915 |
| HOXB7       | 0.03851 | 0.0289   | 0.03395 | 0.02349  | 0.12461 |
| GUCY1B2     | 0.26234 | 0.31177  | 0.27838 | 0.32167  | 0.3871  |
| SERPINA7    | 0.11106 | 0.12489  | 0.12369 | 0.13155  | 0.17154 |
| FPRL2       | 0.06216 | 0.06197  | 0.06713 | 0.06944  | 0.09157 |
| MTRR        | 0.21779 | 0.20692  | 0.24464 | 0.26727  | 0.33304 |
| THRA        | 0.23852 | 0.30182  | 0.29914 | 0.37176  | 0.46213 |
| POR         | 0.18671 | 0.27331  | 0.24558 | 0.30365  | 0.32757 |
| YWHAH       | 1.08537 | 1.06436  | 1.13508 | 1.02691  | 1.20862 |
| TRIM28      | 2.15407 | 2.49249  | 2.55679 | 2.68263  | 3.13902 |
| DHX30       | 0.77155 | 0.86264  | 0.93125 | 0.91883  | 1.1311  |
| CDK8        | 0.0885  | 0.09251  | 0.13986 | 0.1102   | 0.12433 |
| CCNH        | 0.28525 | 0.30611  | 0.30614 | 0.34985  | 0.43203 |
| RFK         | 0.13105 | 0.14446  | 0.14208 | 0.13991  | 0.18226 |
| RABGGTB     | 0.55989 | 0.57706  | 0.60494 | 0.71217  | 0.74842 |
| PLK4        | 0.09841 | 0.08764  | 0.10065 | 0.10083  | 0.14965 |
| CYP4B1      | 0.00467 | 0.01311  | 0.01326 | 0.0155   | 0.05047 |
| TP53BP2     | 0.06098 | 0.06002  | 0.05668 | 0.06888  | 0.09168 |
| NVL         | 0.89297 | 0.91247  | 0.984   | 1.07385  | 1.39606 |
| ARF1        | 2.59929 | 3.0382   | 3.07722 | 3.46924  | 4.0317  |
| PLK2        | 0.07292 | 0.05596  | 0.07017 | 0.06951  | 0.24426 |
| GZMA        | 0.03686 | 0.03909  | 0.02548 | 0.02486  | 0.05802 |
| NOLA2       | 0.12013 | 0.12785  | 0.13214 | 0.15789  | 0.213   |
| HMBS        | 0.23949 | 0.27366  | 0.29814 | 0.27869  | 0.36805 |
| ITIH2       | 0.02221 | 0.02879  | 0.02085 | 0.00995  | 0.06193 |
| SACS        | 0.0539  | 0.07217  | 0.07564 | 0.07208  | 0.12673 |
| GABPA       | 0.15053 | 0.15529  | 0.15069 | 0.15665  | 0.178   |
| ETS2        | 0.10336 | 0.0867   | 0.10868 | 0.12319  | 0.14979 |
| IL8RA       | 0.13492 | 0.15507  | 0.1523  | 0.16673  | 0.19314 |
| API5        | 0.07968 | 0.0787   | 0.04602 | 0.05626  | 0.06716 |
| n.a.        | 0.54894 | 0.58406  | 0.65458 | 0.72517  | 0.89444 |
| ICT1        | 0.30801 | 0.30492  | 0.3088  | 0.33056  | 0.34236 |
| DFFB        | 0.18927 | 0.19347  | 0.22322 | 0.2615   | 0.30372 |
| USP7        | 0.48659 | 0.50416  | 0.59469 | 0.61221  | 0.763   |
| PAP         | 0.16252 | 0.16666  | 0.13525 | 0.18436  | 0.22726 |
| BSG         | 0.15403 | 0.19146  | 0.22144 | 0.22289  | 0.31358 |
| YIF1        | 0.50112 | 0.60056  | 0.61132 | 0.72284  | 0.81976 |
| POLE        | 0.13216 | 0.14465  | 0.14656 | 0.13424  | 0.14919 |
|             | 0.03946 | 0.05009  | 0.03646 | 0.0493   | 0.06023 |

| HGNC Symbol | signDiff_8Tc vs 100Tc | signDiff_6Tc vs 100Tc | signDiff_5Tc vs 100Tc |
|-------------|-----------------------|-----------------------|-----------------------|
| MYC         | +                     | +                     | +                     |
| CACNA1G     | +                     | +                     | +                     |
| NME1        | +                     | +                     | +                     |
| ADCY2       | +                     | +                     | +                     |
| C4orf9      | +                     | +                     | +                     |
| FKBP5       | +                     | +                     | +                     |
| CRKL        | =                     | =                     | +                     |
| RFC5        | +                     | =                     | +                     |
| PPP2CA      | +                     | +                     | +                     |
| TIMM8A      | +                     | +                     | +                     |
| n.a.        | =                     | +                     | +                     |
| MAD2L1      | =                     | +                     | +                     |
| MRPL12      | =                     | +                     | +                     |
| NME1        | =                     | +                     | +                     |
| METTL1      | =                     | +                     | +                     |
| SLC7A5      | =                     | +                     | +                     |
| SRM         | =                     | +                     | +                     |
| IL1B        | =                     | +                     | +                     |
| PAICS       | =                     | +                     | +                     |
| TOMM40      | =                     | +                     | +                     |
| PYCR1       | =                     | +                     | +                     |
| UMPK        | =                     | +                     | +                     |
| LRP8        | =                     | +                     | +                     |
| DUSP14      | =                     | +                     | +                     |
| METAP1      | =                     | +                     | +                     |
| ABCE1       | =                     | +                     | +                     |
| PA2G4       | =                     | +                     | +                     |
| BOP1        | =                     | +                     | +                     |
| RANBP1      | =                     | +                     | +                     |
| CTPS        | =                     | +                     | +                     |
| TRAP1       | =                     | +                     | +                     |
| HSPD1       | =                     | +                     | +                     |
| PFAS        | =                     | +                     | +                     |
| TEAD4       | =                     | +                     | +                     |
| MIF         | =                     | +                     | +                     |
| VAR2        | =                     | +                     | +                     |
| CENTG1      | =                     | +                     | +                     |
| DSCR2       | =                     | =                     | +                     |
| JAG2        | =                     | =                     | +                     |
| PRKAR1B     | =                     | =                     | +                     |
| n.a.        | =                     | =                     | +                     |
| MATK        | -                     | =                     | +                     |
| IARS        | =                     | =                     | +                     |
| GAL         | =                     | =                     | +                     |
| MCAM        | =                     | =                     | +                     |
| CAD         | =                     | =                     | +                     |
| FH          | =                     | =                     | +                     |
| SRPK1       | =                     | =                     | +                     |
| NEFH        | +                     | =                     | +                     |
| NP          | =                     | =                     | +                     |
| AHCY        | =                     | =                     | +                     |
| POLD2       | =                     | =                     | +                     |
| C1QBP       | =                     | =                     | +                     |
| CAMKK2      | =                     | =                     | +                     |
| n.a.        | =                     | =                     | +                     |
| BYSL        | =                     | =                     | +                     |
| NUP155      | =                     | =                     | +                     |

| HGNC Symbol | signDiff_8Tc vs 100Tc | signDiff_6Tc vs 100Tc | signDiff_5Tc vs 100Tc |
|-------------|-----------------------|-----------------------|-----------------------|
| IFRD2       | =                     | =                     | +                     |
| MRPL3       | =                     | =                     | +                     |
| HSPE1       | =                     | =                     | +                     |
| HSPE1       | =                     | =                     | +                     |
| n.a.        | =                     | =                     | +                     |
| EBNA1BP2    | =                     | =                     | +                     |
| TNFRSF8     | =                     | =                     | +                     |
| PRDX4       | =                     | =                     | +                     |
| CSE1L       | =                     | =                     | +                     |
| RPP40       | =                     | =                     | +                     |
| n.a.        | +                     | =                     | +                     |
| HRMT1L2     | =                     | =                     | +                     |
| n.a.        | =                     | =                     | +                     |
| n.a.        | =                     | =                     | +                     |
| MADH4       | =                     | =                     | +                     |
| IL9         | =                     | +                     | +                     |
| PDCD11      | =                     | =                     | +                     |
| HK2         | =                     | =                     | +                     |
| PWP2H       | =                     | =                     | +                     |
| n.a.        | =                     | =                     | +                     |
| NOLC1       | =                     | =                     | +                     |
| NOLC1       | =                     | =                     | +                     |
| CCT2        | =                     | =                     | +                     |
| DTYMK       | =                     | =                     | +                     |
| HNRPAB      | =                     | =                     | +                     |
| FASN        | =                     | =                     | +                     |
| FASN        | =                     | =                     | +                     |
| NMB         | +                     | =                     | +                     |
| CHC1        | =                     | =                     | +                     |
|             | =                     | =                     | +                     |
| KIAA0179    | =                     | =                     | =                     |
| NTHL1       | =                     | =                     | =                     |
| UNG         | =                     | =                     | =                     |
| KIAA0020    | =                     | =                     | =                     |
| n.a.        | =                     | =                     | =                     |
| n.a.        | =                     | =                     | =                     |
| POLE2       | =                     | =                     | =                     |
| MTHFD1      | =                     | =                     | =                     |
| NOL5A       | =                     | =                     | +                     |
| PRPS2       | =                     | =                     | =                     |
| RUVBL2      | =                     | =                     | =                     |
| GPI         | =                     | =                     | =                     |
| n.a.        | =                     | =                     | =                     |
| NPM3        | =                     | +                     | =                     |
| n.a.        | =                     | =                     | =                     |
| CDC20       | =                     | +                     | =                     |
| n.a.        | =                     | =                     | =                     |
| PRKDC       | =                     | =                     | =                     |
| CKS2        | =                     | =                     | =                     |
| CSE1L       | =                     | =                     | =                     |
| EEF1E1      | =                     | +                     | =                     |
| HRMT1L2     | =                     | =                     | =                     |
| n.a.        | =                     | =                     | =                     |
| TST         | =                     | +                     | =                     |
| DKC1        | =                     | =                     | =                     |
| RAN         | =                     | =                     | =                     |
| PDGFRA      | =                     | =                     | =                     |

| HGNC Symbol | signDiff_8Tc vs 100Tc | signDiff_6Tc vs 100Tc | signDiff_5Tc vs 100Tc |
|-------------|-----------------------|-----------------------|-----------------------|
| CDK4        | =                     | +                     | =                     |
| ALDH1B1     | =                     | =                     | =                     |
| SORD        | =                     | +                     | =                     |
| BDH         | =                     | =                     | =                     |
| GMPS        | =                     | =                     | =                     |
| GPR30       | =                     | =                     | =                     |
| PHB         | =                     | =                     | =                     |
| STRA13      | =                     | =                     | =                     |
| XPOT        | =                     | =                     | =                     |
| SMN1        | =                     | =                     | =                     |
| CHC1        | =                     | =                     | =                     |
| PLK1        | =                     | =                     | =                     |
| n.a.        | =                     | =                     | +                     |
| AK2         | =                     | =                     | =                     |
| n.a.        | =                     | =                     | =                     |
| MGST1       | =                     | =                     | =                     |
| CSDA        | =                     | =                     | =                     |
| n.a.        | =                     | =                     | =                     |
| ATP1B3      | =                     | =                     | =                     |
| BCS1L       | =                     | =                     | =                     |
| UNG         | =                     | =                     | =                     |
| PBP         | =                     | =                     | =                     |
| CDC6        | =                     | =                     | =                     |
| CDC7        | =                     | =                     | +                     |
| MTAP        | =                     | =                     | +                     |
| ADSL        | =                     | =                     | =                     |
| CDKN3       | =                     | =                     | =                     |
| VRK1        | =                     | =                     | =                     |
| WFDC2       | =                     | =                     | =                     |
| GSPT1       | =                     | =                     | =                     |
| SLC39A14    | =                     | =                     | =                     |
| n.a.        | =                     | =                     | =                     |
| RLN2        | =                     | =                     | =                     |
| BAG2        | =                     | =                     | =                     |
| HSD17B8     | =                     | =                     | =                     |
| UCHL3       | =                     | =                     | =                     |
| NME2        | =                     | =                     | =                     |
| MRPS12      | =                     | =                     | =                     |
| PCNA        | =                     | =                     | =                     |
| DPH2L2      | =                     | =                     | =                     |
| CCNB1       | =                     | =                     | =                     |
| MC1R        | =                     | =                     | =                     |
| SOD1        | =                     | =                     | =                     |
| ATP5G3      | =                     | =                     | =                     |
| CCT3        | =                     | =                     | +                     |
| RFC4        | =                     | =                     | =                     |
| CDC25A      | =                     | +                     | =                     |
| FRDA        | =                     | =                     | =                     |
| SNRPD1      | =                     | =                     | +                     |
| CHAF1A      | =                     | =                     | =                     |
| PRDX2       | =                     | =                     | =                     |
| BUB1        | =                     | =                     | =                     |
| CDC2        | =                     | =                     | =                     |
| POLR1C      | =                     | =                     | =                     |
| SLC19A1     | -                     | =                     | =                     |
| TOMM20      | =                     | =                     | =                     |
| MMP3        | =                     | =                     | =                     |

| HGNC Symbol | signDiff_8Tc vs 100Tc | signDiff_6Tc vs 100Tc | signDiff_5Tc vs 100Tc |
|-------------|-----------------------|-----------------------|-----------------------|
| UBE2C       | =                     | =                     | =                     |
| PTPN2       | =                     | =                     | =                     |
| RUVBL1      | =                     | =                     | =                     |
| TYMS        | =                     | =                     | =                     |
| DDX10       | =                     | =                     | =                     |
| TUFM        | =                     | =                     | =                     |
| AURKB       | =                     | =                     | =                     |
| RRS1        | =                     | =                     | =                     |
| GEMIN4      | =                     | =                     | =                     |
| PTMA        | =                     | =                     | =                     |
| CYP51A1     | =                     | =                     | =                     |
| ARHGEF5     | =                     | =                     | =                     |
| KIAA0690    | =                     | =                     | =                     |
| VDAC1       | =                     | =                     | =                     |
| DDX1        | =                     | =                     | =                     |
| SCAMP1      | =                     | =                     | =                     |
| DDX18       | =                     | =                     | =                     |
| PES1        | =                     | =                     | =                     |
| RANGAP1     | =                     | =                     | =                     |
| APEX1       | =                     | =                     | =                     |
| MYBL2       | =                     | =                     | =                     |
| USP10       | =                     | =                     | +                     |
| n.a.        | =                     | =                     | =                     |
| RPA3        | =                     | =                     | =                     |
| CXCL12      | =                     | =                     | =                     |
| n.a.        | =                     | =                     | =                     |
| MCM3        | =                     | =                     | =                     |
| GMNN        | =                     | =                     | =                     |
| HSPA9B      | =                     | =                     | =                     |
| TCERG1      | =                     | =                     | =                     |
| RNU3IP2     | =                     | =                     | =                     |
| SFRS7       | =                     | =                     | =                     |
| MSH6        | =                     | =                     | =                     |
| CENPF       | =                     | =                     | =                     |
| MXI1        | =                     | =                     | =                     |
| AMD1        | =                     | =                     | =                     |
| ELK1        | =                     | =                     | =                     |
| ILF3        | =                     | =                     | =                     |
| TFDP1       | =                     | =                     | =                     |
| n.a.        | =                     | =                     | =                     |
| TOP2A       | =                     | =                     | =                     |
| EIF5A       | =                     | =                     | =                     |
| n.a.        | =                     | =                     | =                     |
| n.a.        | =                     | =                     | =                     |
| ATIC        | =                     | =                     | =                     |
| ATIC        | =                     | =                     | =                     |
| PEX5        | =                     | =                     | =                     |
| TAF4B       | =                     | =                     | =                     |
| HDGF        | =                     | =                     | =                     |
| HDGF        | =                     | =                     | =                     |
| ILF2        | =                     | =                     | =                     |
| CCNA2       | =                     | =                     | =                     |
| MDH2        | =                     | =                     | =                     |
| PEG10       | =                     | +                     | +                     |
| PPRC1       | =                     | =                     | =                     |
| SSRP1       | =                     | =                     | =                     |
| PTK9        | =                     | =                     | =                     |

| HGNC Symbol | signDiff_8Tc vs 100Tc | signDiff_6Tc vs 100Tc | signDiff_5Tc vs 100Tc |
|-------------|-----------------------|-----------------------|-----------------------|
| ACSL1       | =                     | =                     | =                     |
| PFKM        | =                     | =                     | =                     |
| HNRPDL      | =                     | =                     | =                     |
| RPIA        | =                     | =                     | =                     |
| SLC16A1     | =                     | =                     | =                     |
| KCNJ6       | =                     | =                     | =                     |
| SFRS2       | =                     | =                     | =                     |
| PRKCI       | =                     | =                     | =                     |
| POLR2H      | =                     | =                     | =                     |
| ABCE1       | =                     | =                     | =                     |
| MELK        | =                     | =                     | =                     |
| DDX21       | =                     | =                     | =                     |
| SSSCA1      | =                     | =                     | =                     |
| n.a.        | =                     | =                     | =                     |
| HSPCA       | =                     | =                     | =                     |
| DEAF1       | =                     | =                     | =                     |
| n.a.        | =                     | =                     | =                     |
| EIF1AX      | =                     | =                     | =                     |
| n.a.        | =                     | =                     | =                     |
| n.a.        | =                     | =                     | =                     |
| SF3A3       | =                     | =                     | =                     |
| n.a.        | =                     | =                     | =                     |
| AK2         | =                     | =                     | =                     |
| PLAUR       | =                     | +                     | +                     |
| SCARB1      | =                     | =                     | =                     |
| MCM2        | =                     | =                     | =                     |
| EXOSC7      | =                     | =                     | =                     |
| KHSRP       | =                     | =                     | =                     |
| NUDC        | =                     | =                     | =                     |
| CGRRF1      | =                     | =                     | =                     |
| APEX1       | =                     | =                     | =                     |
| GARS        | =                     | =                     | =                     |
| EIF3S9      | =                     | =                     | =                     |
| IMPDH1      | =                     | =                     | =                     |
| VEGF        | =                     | =                     | =                     |
| TFDP2       | =                     | =                     | =                     |
| PRDX1       | =                     | =                     | =                     |
| SCO2        | =                     | =                     | =                     |
| TUBG1       | =                     | =                     | =                     |
| MYCN        | =                     | =                     | =                     |
| ABL2        | =                     | =                     | =                     |
| SLC20A1     | =                     | =                     | +                     |
| CDKN2B      | =                     | +                     | =                     |
| n.a.        | =                     | =                     | =                     |
| FANCG       | =                     | =                     | =                     |
| PMPCA       | =                     | =                     | =                     |
| PSMC3       | =                     | =                     | =                     |
| MCM7        | =                     | =                     | =                     |
| ABCA3       | =                     | =                     | =                     |
| EIF4EBP1    | =                     | =                     | =                     |
| TNFRSF4     | =                     | =                     | =                     |
| SRP72       | =                     | =                     | =                     |
| ALG3        | =                     | =                     | =                     |
| CKS1B       | =                     | =                     | =                     |
| NSEP1       | =                     | =                     | =                     |
| FARSLA      | =                     | =                     | =                     |
| PRIM1       | =                     | =                     | =                     |

| HGNC Symbol | signDiff_8Tc vs 100Tc | signDiff_6Tc vs 100Tc | signDiff_5Tc vs 100Tc |
|-------------|-----------------------|-----------------------|-----------------------|
| TBL3        | =                     | =                     | =                     |
| JUND        | =                     | =                     | =                     |
| PTBP1       | =                     | =                     | =                     |
| MRE11A      | =                     | =                     | =                     |
| HSPA5       | =                     | =                     | =                     |
| OAT         | =                     | =                     | =                     |
| TFRC        | =                     | =                     | =                     |
| SHMT1       | =                     | =                     | =                     |
| CLNS1A      | =                     | =                     | =                     |
| SEMA3C      | =                     | =                     | +                     |
| MCAM        | =                     | =                     | =                     |
| MAPKAPK5    | =                     | =                     | =                     |
| SIP1        | =                     | =                     | =                     |
| NF2         | =                     | =                     | =                     |
| SLC1A5      | =                     | =                     | +                     |
| PSMA2       | =                     | =                     | =                     |
| RAD51C      | =                     | =                     | =                     |
| CTSC        | =                     | =                     | =                     |
| HSPA8       | =                     | =                     | =                     |
| n.a.        | =                     | =                     | =                     |
| IGFBP2      | =                     | =                     | =                     |
| DARS        | =                     | =                     | =                     |
| UCHL3       | =                     | =                     | =                     |
| GTF3A       | =                     | =                     | =                     |
| RPL5        | =                     | =                     | =                     |
| AMD1        | =                     | =                     | =                     |
| HSPA1A      | +                     | +                     | +                     |
| SYNGR3      | =                     | =                     | =                     |
| NINJ1       | -                     | =                     | =                     |
| SNRPA1      | =                     | =                     | =                     |
| TAF9        | =                     | =                     | =                     |
| SYNCRIP     | =                     | =                     | =                     |
| n.a.        | =                     | =                     | =                     |
| ITGB3BP     | =                     | =                     | =                     |
| PTPRF       | =                     | =                     | =                     |
| CHEK1       | =                     | =                     | =                     |
| TCEB1       | =                     | =                     | =                     |
| n.a.        | =                     | =                     | =                     |
| VBP1        | =                     | =                     | =                     |
| BUB1B       | =                     | =                     | =                     |
| RACGAP1     | =                     | =                     | =                     |
| AK3         | =                     | =                     | +                     |
| HNRPF       | =                     | =                     | =                     |
| PDAP1       | =                     | =                     | =                     |
| SELE        | =                     | =                     | =                     |
| n.a.        | =                     | =                     | =                     |
| RCN1        | =                     | =                     | +                     |
| GLDC        | =                     | =                     | =                     |
| PMS1        | =                     | =                     | =                     |
| PFKP        | =                     | =                     | =                     |
| PDCD2       | =                     | =                     | =                     |
| MGST2       | =                     | =                     | =                     |
| NDUFB7      | =                     | =                     | =                     |
| G22P1       | =                     | =                     | =                     |
| n.a.        | =                     | =                     | =                     |
| PBEF1       | =                     | =                     | =                     |
| TBL2        | =                     | =                     | =                     |



| HGNC Symbol | signDiff_8Tc vs 100Tc | signDiff_6Tc vs 100Tc | signDiff_5Tc vs 100Tc |
|-------------|-----------------------|-----------------------|-----------------------|
| GCN5L2      | =                     | =                     | =                     |
| CDK2AP1     | =                     | =                     | =                     |
| NOL1        | =                     | =                     | =                     |
| SLC29A1     | =                     | =                     | =                     |
| BNIP1       | =                     | +                     | =                     |
| DBN1        | =                     | =                     | =                     |
| EIF4G1      | =                     | =                     | =                     |
| B4GALT2     | =                     | =                     | =                     |
| TMEM5       | =                     | =                     | =                     |
| FVT1        | =                     | =                     | =                     |
| ETF1        | =                     | =                     | =                     |
| ATF4        | =                     | =                     | =                     |
| ILF3        | =                     | =                     | =                     |
| RAMP1       | =                     | =                     | =                     |
| n.a.        | =                     | =                     | =                     |
| ADCY3       | =                     | =                     | =                     |
| AFG3L2      | =                     | =                     | =                     |
| PRPS1       | =                     | =                     | =                     |
| OPRS1       | -                     | =                     | =                     |
| TOMM70A     | =                     | =                     | =                     |
| APRT        | =                     | =                     | =                     |
| FGFR4       | =                     | =                     | =                     |
| DEFA6       | =                     | =                     | =                     |
| ZNF9        | =                     | +                     | +                     |
| RAC3        | =                     | =                     | +                     |
| WNT10B      | =                     | =                     | +                     |
| NFRKB       | =                     | =                     | =                     |
| CDK5R2      | =                     | -                     | =                     |
| CYCS        | =                     | =                     | +                     |
| YES1        | =                     | =                     | =                     |
| DLEU1       | =                     | =                     | =                     |
| BNIP3       | =                     | =                     | =                     |
| RAD23A      | =                     | =                     | =                     |
|             | =                     | =                     | +                     |
| UBE2G2      | =                     | =                     | =                     |
| KCNQ3       | =                     | =                     | =                     |
| MTA1        | =                     | =                     | =                     |
| LIG3        | =                     | =                     | =                     |
| ITGA2B      | =                     | =                     | =                     |
| TOMM34      | =                     | =                     | -                     |
| ITIH4       | =                     | =                     | =                     |
| POLD1       | =                     | =                     | =                     |
| IKBKAP      | =                     | =                     | =                     |
| ASNS        | =                     | =                     | =                     |
| MX1         | =                     | =                     | =                     |
| XRCC5       | =                     | =                     | =                     |
| XPO1        | =                     | =                     | =                     |
| RAD54L      | =                     | =                     | =                     |
| PTHLH       | =                     | =                     | =                     |
| MSH2        | =                     | =                     | =                     |
| CDKL1       | =                     | =                     | +                     |
| ADA         | =                     | =                     | =                     |
| n.a.        | =                     | =                     | =                     |
| TGFB1       | =                     | =                     | =                     |
| NPTX2       | =                     | =                     | =                     |
| BAG1        | =                     | =                     | =                     |
| BAG1        | =                     | =                     | =                     |

| HGNC Symbol | signDiff_8Tc vs 100Tc | signDiff_6Tc vs 100Tc | signDiff_5Tc vs 100Tc |
|-------------|-----------------------|-----------------------|-----------------------|
| SHB         | =                     | =                     | =                     |
| EIF3S10     | =                     | =                     | =                     |
| HTATIP2     | =                     | =                     | =                     |
| CALCA       | =                     | =                     | =                     |
| C6orf108    | =                     | =                     | =                     |
| ACY1        | =                     | =                     | =                     |
| PASK        | =                     | =                     | =                     |
| CEBPZ       | =                     | =                     | =                     |
| RAP1A       | =                     | =                     | =                     |
| NID         | =                     | =                     | +                     |
| IDE         | =                     | =                     | =                     |
| HOXB7       | =                     | =                     | =                     |
| GUCY1B2     | =                     | =                     | =                     |
| SERPINA7    | =                     | =                     | =                     |
| FPRL2       | =                     | =                     | =                     |
| MTRR        | =                     | =                     | =                     |
| THRA        | =                     | =                     | =                     |
| POR         | =                     | =                     | =                     |
| YWHAH       | =                     | =                     | =                     |
| TRIM28      | =                     | =                     | =                     |
| DHX30       | =                     | =                     | =                     |
| CDK8        | =                     | =                     | =                     |
| CCNH        | =                     | =                     | =                     |
| RFK         | =                     | =                     | =                     |
| RABGGTB     | =                     | =                     | =                     |
| PLK4        | =                     | =                     | =                     |
| CYP4B1      | =                     | =                     | =                     |
| TP53BP2     | +                     | =                     | =                     |
| NVL         | =                     | =                     | =                     |
| ARF1        | =                     | =                     | =                     |
| PLK2        | =                     | =                     | =                     |
| GZMA        | =                     | =                     | =                     |
| NOLA2       | +                     | =                     | =                     |
| HMBS        | =                     | =                     | =                     |
| ITIH2       | =                     | =                     | =                     |
| SACS        | -                     | =                     | =                     |
| GABPA       | =                     | =                     | =                     |
| ETS2        | =                     | =                     | =                     |
| IL8RA       | =                     | =                     | =                     |
| API5        | =                     | =                     | +                     |
| n.a.        | =                     | =                     | =                     |
| ICT1        | =                     | +                     | =                     |
| DFFB        | =                     | =                     | =                     |
| USP7        | =                     | =                     | =                     |
| PAP         | =                     | =                     | =                     |
| BSG         | =                     | =                     | =                     |
| YIF1        | =                     | =                     | =                     |
| POLE        | =                     | +                     | =                     |
|             | -                     | =                     | +                     |

| HGNC Symbol | signDiff_4Tc vs 100Tc | signDiff_3Tc vs 100Tc | signDiff_2Tc vs 100Tc |
|-------------|-----------------------|-----------------------|-----------------------|
| MYC         | +                     | +                     | +                     |
| CACNA1G     | +                     | +                     | +                     |
| NME1        | +                     | +                     | +                     |
| ADCY2       | =                     | +                     | =                     |
| C4orf9      | +                     | +                     | +                     |
| FKBP5       | +                     | +                     | +                     |
| CRKL        | +                     | +                     | +                     |
| RFC5        | +                     | +                     | +                     |
| PPP2CA      | +                     | +                     | +                     |
| TIMM8A      | +                     | +                     | +                     |
| n.a.        | +                     | +                     | +                     |
| MAD2L1      | +                     | +                     | +                     |
| MRPL12      | +                     | +                     | +                     |
| NME1        | +                     | +                     | +                     |
| METTL1      | +                     | +                     | +                     |
| SLC7A5      | +                     | +                     | +                     |
| SRM         | +                     | +                     | +                     |
| IL1B        | +                     | +                     | +                     |
| PAICS       | +                     | +                     | +                     |
| TOMM40      | +                     | +                     | +                     |
| PYCR1       | +                     | +                     | +                     |
| UMPK        | +                     | +                     | +                     |
| LRP8        | +                     | +                     | +                     |
| DUSP14      | +                     | +                     | +                     |
| METAP1      | +                     | +                     | +                     |
| ABCE1       | +                     | +                     | +                     |
| PA2G4       | +                     | +                     | +                     |
| BOP1        | +                     | +                     | +                     |
| RANBP1      | +                     | +                     | +                     |
| CTPS        | +                     | +                     | +                     |
| TRAP1       | +                     | +                     | +                     |
| HSPD1       | +                     | +                     | +                     |
| PFAS        | +                     | +                     | +                     |
| TEAD4       | +                     | +                     | +                     |
| MIF         | +                     | +                     | +                     |
| VAR2        | +                     | +                     | +                     |
| CENTG1      | +                     | +                     | +                     |
| DSCR2       | +                     | +                     | +                     |
| JAG2        | +                     | +                     | +                     |
| PRKAR1B     | +                     | +                     | +                     |
| n.a.        | +                     | +                     | +                     |
| MATK        | +                     | +                     | +                     |
| IARS        | +                     | +                     | +                     |
| GAL         | +                     | +                     | +                     |
| MCAM        | +                     | +                     | +                     |
| CAD         | +                     | +                     | +                     |
| FH          | +                     | +                     | +                     |
| SRPK1       | +                     | +                     | +                     |
| NEFH        | +                     | +                     | +                     |
| NP          | +                     | +                     | +                     |
| AHCY        | +                     | +                     | +                     |
| POLD2       | +                     | +                     | +                     |
| C1QBP       | +                     | +                     | +                     |
| CAMKK2      | +                     | +                     | +                     |
| n.a.        | +                     | +                     | +                     |
| BYSL        | +                     | +                     | +                     |
| NUP155      | +                     | +                     | +                     |

| HGNC Symbol | signDiff_4Tc vs 100Tc | signDiff_3Tc vs 100Tc | signDiff_2Tc vs 100Tc |
|-------------|-----------------------|-----------------------|-----------------------|
| IFRD2       | +                     | +                     | +                     |
| MRPL3       | +                     | +                     | +                     |
| HSPE1       | +                     | +                     | +                     |
| HSPE1       | +                     | +                     | +                     |
| n.a.        | +                     | +                     | +                     |
| EBNA1BP2    | +                     | +                     | +                     |
| TNFRSF8     | +                     | +                     | +                     |
| PRDX4       | +                     | +                     | +                     |
| CSE1L       | +                     | +                     | +                     |
| RPP40       | +                     | +                     | +                     |
| n.a.        | +                     | +                     | +                     |
| HRMT1L2     | +                     | +                     | +                     |
| n.a.        | +                     | +                     | +                     |
| n.a.        | +                     | +                     | +                     |
| MADH4       | +                     | +                     | +                     |
| IL9         | +                     | +                     | +                     |
| PDCD11      | +                     | +                     | +                     |
| HK2         | +                     | +                     | +                     |
| PWP2H       | +                     | +                     | +                     |
| n.a.        | +                     | +                     | +                     |
| NOLC1       | +                     | +                     | +                     |
| NOLC1       | +                     | +                     | +                     |
| CCT2        | +                     | +                     | +                     |
| DTYMK       | +                     | +                     | +                     |
| HNRPAB      | +                     | +                     | +                     |
| FASN        | +                     | +                     | +                     |
| FASN        | +                     | +                     | +                     |
| NMB         | +                     | +                     | +                     |
| CHC1        | +                     | +                     | +                     |
|             | +                     | +                     | +                     |
| KIAA0179    | +                     | +                     | +                     |
| NTHL1       | +                     | +                     | +                     |
| UNG         | +                     | +                     | +                     |
| KIAA0020    | +                     | +                     | +                     |
| n.a.        | +                     | +                     | +                     |
| n.a.        | +                     | +                     | +                     |
| POLE2       | +                     | +                     | +                     |
| MTHFD1      | +                     | +                     | +                     |
| NOL5A       | +                     | +                     | +                     |
| PRPS2       | +                     | +                     | +                     |
| RUVBL2      | +                     | +                     | +                     |
| GPI         | +                     | +                     | +                     |
| n.a.        | +                     | +                     | +                     |
| NPM3        | +                     | +                     | +                     |
| n.a.        | +                     | +                     | +                     |
| CDC20       | +                     | +                     | +                     |
| n.a.        | +                     | +                     | +                     |
| PRKDC       | +                     | +                     | +                     |
| CKS2        | +                     | +                     | +                     |
| CSE1L       | +                     | +                     | +                     |
| EEF1E1      | +                     | +                     | +                     |
| HRMT1L2     | +                     | +                     | +                     |
| n.a.        | +                     | +                     | +                     |
| TST         | +                     | +                     | +                     |
| DKC1        | +                     | +                     | +                     |
| RAN         | +                     | +                     | +                     |
| PDGFRA      | +                     | +                     | +                     |

| HGNC Symbol | signDiff_4Tc vs 100Tc | signDiff_3Tc vs 100Tc | signDiff_2Tc vs 100Tc |
|-------------|-----------------------|-----------------------|-----------------------|
| CDK4        | +                     | +                     | +                     |
| ALDH1B1     | +                     | +                     | +                     |
| SORD        | +                     | +                     | +                     |
| BDH         | +                     | +                     | +                     |
| GMPS        | +                     | +                     | +                     |
| GPR30       | +                     | +                     | +                     |
| PHB         | +                     | +                     | +                     |
| STRA13      | +                     | +                     | +                     |
| XPOT        | +                     | +                     | +                     |
| SMN1        | +                     | +                     | +                     |
| CHC1        | +                     | +                     | +                     |
| PLK1        | +                     | +                     | +                     |
| n.a.        | =                     | +                     | +                     |
| AK2         | =                     | +                     | +                     |
| n.a.        | =                     | +                     | +                     |
| MGST1       | =                     | +                     | +                     |
| CSDA        | =                     | +                     | +                     |
| n.a.        | =                     | +                     | +                     |
| ATP1B3      | =                     | +                     | +                     |
| BCS1L       | =                     | +                     | +                     |
| UNG         | =                     | +                     | +                     |
| PBP         | =                     | +                     | +                     |
| CDC6        | =                     | +                     | +                     |
| CDC7        | =                     | +                     | +                     |
| MTAP        | =                     | +                     | +                     |
| ADSL        | =                     | +                     | +                     |
| CDKN3       | =                     | +                     | +                     |
| VRK1        | =                     | +                     | +                     |
| WFDC2       | =                     | +                     | +                     |
| GSPT1       | =                     | +                     | +                     |
| SLC39A14    | =                     | +                     | +                     |
| n.a.        | =                     | +                     | +                     |
| RLN2        | =                     | +                     | +                     |
| BAG2        | =                     | +                     | +                     |
| HSD17B8     | =                     | +                     | +                     |
| UCHL3       | =                     | +                     | +                     |
| NME2        | =                     | +                     | +                     |
| MRPS12      | =                     | +                     | +                     |
| PCNA        | =                     | +                     | +                     |
| DPH2L2      | =                     | +                     | +                     |
| CCNB1       | =                     | +                     | +                     |
| MC1R        | +                     | +                     | +                     |
| SOD1        | =                     | +                     | +                     |
| ATP5G3      | =                     | +                     | +                     |
| CCT3        | =                     | +                     | +                     |
| RFC4        | =                     | +                     | +                     |
| CDC25A      | =                     | +                     | +                     |
| FRDA        | =                     | +                     | +                     |
| SNRPD1      | +                     | +                     | +                     |
| CHAF1A      | =                     | +                     | +                     |
| PRDX2       | =                     | +                     | +                     |
| BUB1        | =                     | +                     | +                     |
| CDC2        | +                     | +                     | +                     |
| POLR1C      | =                     | +                     | +                     |
| SLC19A1     | =                     | +                     | +                     |
| TOMM20      | =                     | +                     | +                     |
| MMP3        | =                     | +                     | +                     |

| HGNC Symbol | signDiff_4Tc vs 100Tc | signDiff_3Tc vs 100Tc | signDiff_2Tc vs 100Tc |
|-------------|-----------------------|-----------------------|-----------------------|
| UBE2C       | =                     | +                     | +                     |
| PTPN2       | =                     | +                     | +                     |
| RUVBL1      | =                     | +                     | +                     |
| TYMS        | +                     | +                     | +                     |
| DDX10       | =                     | +                     | +                     |
| TUFM        | =                     | +                     | +                     |
| AURKB       | =                     | +                     | +                     |
| RRS1        | =                     | +                     | +                     |
| GEMIN4      | =                     | +                     | +                     |
| PTMA        | =                     | +                     | +                     |
| CYP51A1     | =                     | =                     | +                     |
| ARHGEF5     | =                     | =                     | +                     |
| KIAA0690    | =                     | =                     | +                     |
| VDAC1       | =                     | =                     | +                     |
| DDX1        | =                     | =                     | +                     |
| SCAMP1      | =                     | =                     | +                     |
| DDX18       | =                     | =                     | +                     |
| PES1        | =                     | =                     | +                     |
| RANGAP1     | =                     | =                     | +                     |
| APEX1       | =                     | =                     | +                     |
| MYBL2       | =                     | =                     | +                     |
| USP10       | =                     | =                     | +                     |
| n.a.        | =                     | =                     | +                     |
| RPA3        | =                     | =                     | +                     |
| CXCL12      | =                     | =                     | +                     |
| n.a.        | =                     | =                     | +                     |
| MCM3        | =                     | +                     | +                     |
| GMNN        | =                     | =                     | +                     |
| HSPA9B      | =                     | +                     | +                     |
| TCERG1      | =                     | =                     | +                     |
| RNU3IP2     | =                     | =                     | +                     |
| SFRS7       | =                     | =                     | +                     |
| MSH6        | =                     | +                     | +                     |
| CENPF       | =                     | =                     | +                     |
| MXI1        | =                     | =                     | +                     |
| AMD1        | =                     | =                     | +                     |
| ELK1        | =                     | =                     | +                     |
| ILF3        | =                     | =                     | +                     |
| TFDP1       | =                     | =                     | +                     |
| n.a.        | =                     | =                     | +                     |
| TOP2A       | =                     | =                     | +                     |
| EIF5A       | =                     | =                     | +                     |
| n.a.        | +                     | +                     | +                     |
| n.a.        | =                     | =                     | +                     |
| ATIC        | =                     | =                     | +                     |
| ATIC        | =                     | =                     | +                     |
| PEX5        | =                     | +                     | +                     |
| TAF4B       | =                     | =                     | +                     |
| HDGF        | =                     | =                     | +                     |
| HDGF        | =                     | +                     | +                     |
| ILF2        | =                     | =                     | +                     |
| CCNA2       | =                     | =                     | +                     |
| MDH2        | =                     | =                     | +                     |
| PEG10       | =                     | =                     | +                     |
| PPRC1       | =                     | =                     | +                     |
| SSRP1       | =                     | +                     | +                     |
| PTK9        | =                     | =                     | +                     |

| HGNC Symbol | signDiff_4Tc vs 100Tc | signDiff_3Tc vs 100Tc | signDiff_2Tc vs 100Tc |
|-------------|-----------------------|-----------------------|-----------------------|
| ACSL1       | =                     | =                     | +                     |
| PFKM        | =                     | =                     | +                     |
| HNRPDL      | =                     | =                     | +                     |
| RPIA        | =                     | =                     | +                     |
| SLC16A1     | =                     | =                     | +                     |
| KCNJ6       | =                     | =                     | +                     |
| SFRS2       | =                     | =                     | +                     |
| PRKCI       | =                     | =                     | +                     |
| POLR2H      | =                     | =                     | +                     |
| ABCE1       | +                     | =                     | +                     |
| MELK        | =                     | =                     | +                     |
| DDX21       | +                     | =                     | +                     |
| SSSCA1      | =                     | =                     | +                     |
| n.a.        | =                     | =                     | +                     |
| HSPCA       | +                     | =                     | +                     |
| DEAF1       | =                     | =                     | +                     |
| n.a.        | =                     | =                     | +                     |
| EIF1AX      | +                     | =                     | +                     |
| n.a.        | =                     | =                     | +                     |
| n.a.        | =                     | =                     | +                     |
| SF3A3       | =                     | =                     | +                     |
| n.a.        | =                     | +                     | =                     |
| AK2         | =                     | =                     | =                     |
| PLAUR       | +                     | +                     | =                     |
| SCARB1      | =                     | =                     | =                     |
| MCM2        | =                     | =                     | =                     |
| EXOSC7      | =                     | =                     | =                     |
| KHSRP       | =                     | =                     | =                     |
| NUDC        | =                     | =                     | =                     |
| CGRRF1      | =                     | +                     | =                     |
| APEX1       | =                     | =                     | =                     |
| GARS        | =                     | =                     | =                     |
| EIF3S9      | =                     | =                     | =                     |
| IMPDH1      | =                     | =                     | =                     |
| VEGF        | =                     | +                     | =                     |
| TFDP2       | =                     | =                     | =                     |
| PRDX1       | =                     | =                     | =                     |
| SCO2        | =                     | =                     | =                     |
| TUBG1       | =                     | =                     | =                     |
| MYCN        | =                     | =                     | =                     |
| ABL2        | =                     | =                     | =                     |
| SLC20A1     | =                     | =                     | =                     |
| CDKN2B      | =                     | +                     | =                     |
| n.a.        | =                     | =                     | =                     |
| FANCG       | =                     | =                     | =                     |
| PMPCA       | =                     | =                     | =                     |
| PSMC3       | =                     | =                     | =                     |
| MCM7        | =                     | =                     | =                     |
| ABCA3       | =                     | +                     | =                     |
| EIF4EBP1    | =                     | =                     | =                     |
| TNFRSF4     | =                     | =                     | =                     |
| SRP72       | =                     | =                     | =                     |
| ALG3        | =                     | =                     | =                     |
| CKS1B       | =                     | =                     | =                     |
| NSEP1       | =                     | =                     | =                     |
| FARSLA      | =                     | =                     | =                     |
| PRIM1       | =                     | =                     | =                     |

| HGNC Symbol | signDiff_4Tc vs 100Tc | signDiff_3Tc vs 100Tc | signDiff_2Tc vs 100Tc |
|-------------|-----------------------|-----------------------|-----------------------|
| TBL3        | =                     | =                     | =                     |
| JUND        | =                     | =                     | =                     |
| PTBP1       | =                     | =                     | +                     |
| MRE11A      | =                     | =                     | =                     |
| HSPA5       | =                     | =                     | =                     |
| OAT         | =                     | =                     | =                     |
| TFRC        | =                     | =                     | =                     |
| SHMT1       | =                     | =                     | =                     |
| CLNS1A      | =                     | =                     | =                     |
| SEMA3C      | =                     | =                     | +                     |
| MCAM        | =                     | =                     | =                     |
| MAPKAPK5    | =                     | =                     | =                     |
| SIP1        | =                     | +                     | +                     |
| NF2         | =                     | =                     | =                     |
| SLC1A5      | =                     | =                     | =                     |
| PSMA2       | =                     | =                     | =                     |
| RAD51C      | =                     | =                     | =                     |
| CTSC        | =                     | =                     | =                     |
| HSPA8       | =                     | =                     | +                     |
| n.a.        | =                     | =                     | =                     |
| IGFBP2      | =                     | =                     | =                     |
| DARS        | =                     | =                     | =                     |
| UCHL3       | =                     | =                     | +                     |
| GTF3A       | =                     | =                     | =                     |
| RPL5        | =                     | =                     | +                     |
| AMD1        | =                     | =                     | =                     |
| HSPA1A      | =                     | =                     | +                     |
| SYNGR3      | =                     | =                     | =                     |
| NINJ1       | =                     | =                     | =                     |
| SNRPA1      | =                     | =                     | =                     |
| TAF9        | =                     | =                     | =                     |
| SYNCRIP     | =                     | =                     | +                     |
| n.a.        | =                     | =                     | =                     |
| ITGB3BP     | =                     | =                     | +                     |
| PTPRF       | =                     | =                     | =                     |
| CHEK1       | =                     | =                     | +                     |
| TCEB1       | =                     | =                     | =                     |
| n.a.        | =                     | =                     | =                     |
| VBP1        | =                     | =                     | =                     |
| BUB1B       | =                     | =                     | =                     |
| RACGAP1     | =                     | =                     | +                     |
| AK3         | =                     | +                     | =                     |
| HNRPF       | =                     | =                     | =                     |
| PDAP1       | =                     | =                     | +                     |
| SELE        | =                     | =                     | =                     |
| n.a.        | =                     | =                     | =                     |
| RCN1        | =                     | +                     | +                     |
| GLDC        | =                     | =                     | =                     |
| PMS1        | =                     | =                     | =                     |
| PFKP        | =                     | =                     | =                     |
| PDCD2       | =                     | =                     | =                     |
| MGST2       | =                     | =                     | =                     |
| NDUFB7      | =                     | =                     | =                     |
| G22P1       | =                     | =                     | =                     |
| n.a.        | =                     | =                     | =                     |
| PBEF1       | =                     | =                     | =                     |
| TBL2        | =                     | =                     | =                     |



| HGNC Symbol | signDiff_4Tc vs 100Tc | signDiff_3Tc vs 100Tc | signDiff_2Tc vs 100Tc |
|-------------|-----------------------|-----------------------|-----------------------|
| GCN5L2      | =                     | =                     | =                     |
| CDK2AP1     | =                     | =                     | =                     |
| NOL1        | =                     | =                     | =                     |
| SLC29A1     | =                     | =                     | =                     |
| BNIP1       | =                     | =                     | =                     |
| DBN1        | =                     | =                     | =                     |
| EIF4G1      | =                     | =                     | =                     |
| B4GALT2     | =                     | =                     | =                     |
| TMEM5       | =                     | =                     | =                     |
| FVT1        | =                     | =                     | =                     |
| ETF1        | =                     | =                     | +                     |
| ATF4        | =                     | =                     | =                     |
| ILF3        | =                     | =                     | =                     |
| RAMP1       | =                     | =                     | =                     |
| n.a.        | =                     | =                     | =                     |
| ADCY3       | =                     | =                     | =                     |
| AFG3L2      | =                     | =                     | =                     |
| PRPS1       | =                     | =                     | =                     |
| OPRS1       | =                     | =                     | =                     |
| TOMM70A     | =                     | =                     | =                     |
| APRT        | =                     | =                     | =                     |
| FGFR4       | =                     | =                     | =                     |
| DEFA6       | =                     | =                     | =                     |
| ZNF9        | +                     | =                     | +                     |
| RAC3        | +                     | +                     | =                     |
| WNT10B      | +                     | =                     | +                     |
| NFRKB       | =                     | =                     | =                     |
| CDK5R2      | =                     | =                     | =                     |
| CYCS        | =                     | +                     | +                     |
| YES1        | =                     | =                     | =                     |
| DLEU1       | =                     | =                     | =                     |
| BNIP3       | =                     | =                     | =                     |
| RAD23A      | =                     | =                     | =                     |
|             | =                     | =                     | +                     |
| UBE2G2      | =                     | =                     | =                     |
| KCNQ3       | =                     | =                     | =                     |
| MTA1        | =                     | =                     | =                     |
| LIG3        | =                     | =                     | =                     |
| ITGA2B      | =                     | =                     | =                     |
| TOMM34      | +                     | =                     | =                     |
| ITIH4       | =                     | =                     | =                     |
| POLD1       | =                     | =                     | =                     |
| IKBKAP      | =                     | =                     | =                     |
| ASNS        | =                     | =                     | =                     |
| MX1         | =                     | =                     | =                     |
| XRCC5       | +                     | +                     | +                     |
| XPO1        | =                     | =                     | =                     |
| RAD54L      | =                     | =                     | =                     |
| PTHLH       | -                     | -                     | -                     |
| MSH2        | =                     | =                     | =                     |
| CDKL1       | =                     | =                     | =                     |
| ADA         | =                     | =                     | =                     |
| n.a.        | =                     | =                     | =                     |
| TGFB1       | =                     | =                     | =                     |
| NPTX2       | =                     | =                     | =                     |
| BAG1        | =                     | =                     | =                     |
| BAG1        | =                     | =                     | =                     |

| HGNC Symbol | signDiff_4Tc vs 100Tc | signDiff_3Tc vs 100Tc | signDiff_2Tc vs 100Tc |
|-------------|-----------------------|-----------------------|-----------------------|
| SHB         | =                     | =                     | =                     |
| EIF3S10     | =                     | =                     | =                     |
| HTATIP2     | =                     | =                     | =                     |
| CALCA       | =                     | =                     | +                     |
| C6orf108    | =                     | =                     | =                     |
| ACY1        | =                     | =                     | =                     |
| PASK        | =                     | =                     | =                     |
| CEBPZ       | =                     | =                     | =                     |
| RAP1A       | =                     | =                     | =                     |
| NID         | +                     | +                     | =                     |
| IDE         | =                     | =                     | =                     |
| HOXB7       | =                     | =                     | =                     |
| GUCY1B2     | =                     | =                     | =                     |
| SERPINA7    | =                     | =                     | =                     |
| FPRL2       | =                     | =                     | =                     |
| MTRR        | =                     | =                     | =                     |
| THRA        | =                     | =                     | =                     |
| POR         | =                     | =                     | =                     |
| YWHAH       | =                     | =                     | =                     |
| TRIM28      | =                     | =                     | =                     |
| DHX30       | =                     | =                     | =                     |
| CDK8        | =                     | =                     | =                     |
| CCNH        | =                     | =                     | =                     |
| RFK         | =                     | =                     | =                     |
| RABGGTB     | =                     | =                     | =                     |
| PLK4        | =                     | =                     | =                     |
| CYP4B1      | =                     | =                     | -                     |
| TP53BP2     | =                     | =                     | =                     |
| NVL         | =                     | =                     | =                     |
| ARF1        | =                     | =                     | =                     |
| PLK2        | =                     | =                     | =                     |
| GZMA        | =                     | +                     | =                     |
| NOLA2       | =                     | =                     | =                     |
| HMBS        | =                     | =                     | =                     |
| ITIH2       | =                     | =                     | =                     |
| SACS        | =                     | =                     | =                     |
| GABPA       | =                     | =                     | =                     |
| ETS2        | =                     | =                     | =                     |
| IL8RA       | =                     | =                     | =                     |
| API5        | +                     | +                     | +                     |
| n.a.        | =                     | =                     | =                     |
| ICT1        | =                     | =                     | =                     |
| DFFB        | =                     | =                     | =                     |
| USP7        | =                     | =                     | =                     |
| PAP         | =                     | =                     | =                     |
| BSG         | =                     | =                     | =                     |
| YIF1        | =                     | =                     | =                     |
| POLE        | =                     | =                     | =                     |
|             | =                     | =                     | =                     |

| <b>HGNC Symbol</b> | <b>signDiff_1 5Tc vs 100Tc</b> | <b>signDiff_1Tc vs 100Tc</b> | <b>signDiff_0 5Tc vs 100Tc</b> |
|--------------------|--------------------------------|------------------------------|--------------------------------|
| MYC                | +                              | +                            | +                              |
| CACNA1G            | +                              | +                            | +                              |
| NME1               | +                              | +                            | +                              |
| ADCY2              | +                              | +                            | +                              |
| C4orf9             | +                              | +                            | +                              |
| FKBP5              | +                              | +                            | +                              |
| CRKL               | +                              | +                            | +                              |
| RFC5               | +                              | +                            | +                              |
| PPP2CA             | +                              | +                            | +                              |
| TIMM8A             | +                              | +                            | +                              |
| n.a.               | +                              | +                            | +                              |
| MAD2L1             | +                              | +                            | +                              |
| MRPL12             | +                              | +                            | +                              |
| NME1               | +                              | +                            | +                              |
| METTL1             | +                              | +                            | +                              |
| SLC7A5             | +                              | +                            | +                              |
| SRM                | +                              | +                            | +                              |
| IL1B               | +                              | +                            | +                              |
| PAICS              | +                              | +                            | +                              |
| TOMM40             | +                              | +                            | +                              |
| PYCR1              | +                              | +                            | +                              |
| UMPK               | +                              | +                            | +                              |
| LRP8               | +                              | +                            | +                              |
| DUSP14             | +                              | +                            | +                              |
| METAP1             | +                              | +                            | +                              |
| ABCE1              | +                              | +                            | +                              |
| PA2G4              | +                              | +                            | +                              |
| BOP1               | +                              | +                            | +                              |
| RANBP1             | +                              | +                            | +                              |
| CTPS               | +                              | +                            | +                              |
| TRAP1              | +                              | +                            | +                              |
| HSPD1              | +                              | +                            | +                              |
| PFAS               | +                              | +                            | +                              |
| TEAD4              | +                              | +                            | +                              |
| MIF                | +                              | +                            | +                              |
| VAR2               | +                              | +                            | +                              |
| CENTG1             | +                              | +                            | +                              |
| DSCR2              | +                              | +                            | +                              |
| JAG2               | +                              | +                            | +                              |
| PRKAR1B            | +                              | +                            | +                              |
| n.a.               | +                              | +                            | +                              |
| MATK               | +                              | +                            | +                              |
| IARS               | +                              | +                            | +                              |
| GAL                | +                              | +                            | +                              |
| MCAM               | +                              | +                            | +                              |
| CAD                | +                              | +                            | +                              |
| FH                 | +                              | +                            | +                              |
| SRPK1              | +                              | +                            | +                              |
| NEFH               | +                              | +                            | +                              |
| NP                 | +                              | +                            | +                              |
| AHCY               | +                              | +                            | +                              |
| POLD2              | +                              | +                            | +                              |
| C1QBP              | +                              | +                            | +                              |
| CAMKK2             | +                              | +                            | +                              |
| n.a.               | +                              | +                            | +                              |
| BYSL               | +                              | +                            | +                              |
| NUP155             | +                              | +                            | +                              |

| HGNC Symbol | signDiff_1 5Tc vs 100Tc | signDiff_1Tc vs 100Tc | signDiff_0 5Tc vs 100Tc |
|-------------|-------------------------|-----------------------|-------------------------|
| IFRD2       | +                       | +                     | +                       |
| MRPL3       | +                       | +                     | +                       |
| HSPE1       | +                       | +                     | +                       |
| HSPE1       | +                       | +                     | +                       |
| n.a.        | +                       | +                     | +                       |
| EBNA1BP2    | +                       | +                     | +                       |
| TNFRSF8     | +                       | +                     | +                       |
| PRDX4       | +                       | +                     | +                       |
| CSE1L       | +                       | +                     | +                       |
| RPP40       | +                       | +                     | +                       |
| n.a.        | +                       | +                     | +                       |
| HRMT1L2     | +                       | +                     | +                       |
| n.a.        | +                       | +                     | +                       |
| n.a.        | +                       | +                     | +                       |
| MADH4       | +                       | +                     | +                       |
| IL9         | +                       | +                     | +                       |
| PDCD11      | +                       | +                     | +                       |
| HK2         | +                       | +                     | +                       |
| PWP2H       | +                       | +                     | +                       |
| n.a.        | +                       | +                     | +                       |
| NOLC1       | +                       | +                     | +                       |
| NOLC1       | +                       | +                     | +                       |
| CCT2        | +                       | +                     | +                       |
| DTYMK       | +                       | +                     | +                       |
| HNRPAB      | +                       | +                     | +                       |
| FASN        | +                       | +                     | +                       |
| FASN        | +                       | +                     | +                       |
| NMB         | +                       | +                     | +                       |
| CHC1        | +                       | +                     | +                       |
|             | +                       | +                     | +                       |
| KIAA0179    | +                       | +                     | +                       |
| NTHL1       | +                       | +                     | +                       |
| UNG         | +                       | +                     | +                       |
| KIAA0020    | +                       | +                     | +                       |
| n.a.        | +                       | +                     | +                       |
| n.a.        | +                       | +                     | +                       |
| POLE2       | +                       | +                     | +                       |
| MTHFD1      | +                       | +                     | +                       |
| NOL5A       | +                       | +                     | +                       |
| PRPS2       | +                       | +                     | +                       |
| RUVBL2      | +                       | +                     | +                       |
| GPI         | +                       | +                     | +                       |
| n.a.        | +                       | +                     | +                       |
| NPM3        | +                       | +                     | +                       |
| n.a.        | +                       | +                     | +                       |
| CDC20       | +                       | +                     | +                       |
| n.a.        | +                       | +                     | +                       |
| PRKDC       | +                       | +                     | +                       |
| CKS2        | +                       | +                     | +                       |
| CSE1L       | +                       | +                     | +                       |
| EEF1E1      | +                       | +                     | +                       |
| HRMT1L2     | +                       | +                     | +                       |
| n.a.        | +                       | +                     | +                       |
| TST         | +                       | +                     | +                       |
| DKC1        | +                       | +                     | +                       |
| RAN         | +                       | +                     | +                       |
| PDGFRA      | +                       | +                     | +                       |

| HGNC Symbol | signDiff_1 5Tc vs 100Tc | signDiff_1Tc vs 100Tc | signDiff_0 5Tc vs 100Tc |
|-------------|-------------------------|-----------------------|-------------------------|
| CDK4        | +                       | =                     | +                       |
| ALDH1B1     | +                       | +                     | +                       |
| SORD        | +                       | +                     | +                       |
| BDH         | +                       | +                     | +                       |
| GMPS        | +                       | +                     | +                       |
| GPR30       | +                       | +                     | +                       |
| PHB         | +                       | +                     | +                       |
| STRA13      | +                       | +                     | +                       |
| XPOT        | +                       | +                     | +                       |
| SMN1        | +                       | +                     | +                       |
| CHC1        | +                       | +                     | +                       |
| PLK1        | +                       | +                     | +                       |
| n.a.        | +                       | +                     | +                       |
| AK2         | +                       | +                     | +                       |
| n.a.        | +                       | +                     | +                       |
| MGST1       | +                       | +                     | +                       |
| CSDA        | +                       | +                     | +                       |
| n.a.        | +                       | +                     | +                       |
| ATP1B3      | +                       | +                     | +                       |
| BCS1L       | +                       | +                     | +                       |
| UNG         | +                       | +                     | +                       |
| PBP         | +                       | +                     | +                       |
| CDC6        | +                       | +                     | +                       |
| CDC7        | +                       | +                     | +                       |
| MTAP        | +                       | +                     | +                       |
| ADSL        | +                       | +                     | +                       |
| CDKN3       | +                       | +                     | +                       |
| VRK1        | +                       | +                     | +                       |
| WFDC2       | +                       | +                     | +                       |
| GSPT1       | +                       | +                     | +                       |
| SLC39A14    | +                       | +                     | +                       |
| n.a.        | +                       | +                     | +                       |
| RLN2        | +                       | +                     | +                       |
| BAG2        | +                       | +                     | +                       |
| HSD17B8     | +                       | +                     | +                       |
| UCHL3       | +                       | +                     | +                       |
| NME2        | +                       | +                     | +                       |
| MRPS12      | +                       | +                     | +                       |
| PCNA        | +                       | +                     | +                       |
| DPH2L2      | +                       | +                     | +                       |
| CCNB1       | +                       | +                     | +                       |
| MC1R        | +                       | +                     | +                       |
| SOD1        | +                       | +                     | +                       |
| ATP5G3      | +                       | +                     | +                       |
| CCT3        | +                       | +                     | +                       |
| RFC4        | +                       | +                     | +                       |
| CDC25A      | +                       | +                     | +                       |
| FRDA        | +                       | +                     | +                       |
| SNRPD1      | +                       | +                     | +                       |
| CHAF1A      | +                       | +                     | +                       |
| PRDX2       | +                       | +                     | +                       |
| BUB1        | +                       | +                     | +                       |
| CDC2        | +                       | +                     | +                       |
| POLR1C      | +                       | +                     | +                       |
| SLC19A1     | +                       | +                     | +                       |
| TOMM20      | +                       | +                     | +                       |
| MMP3        | +                       | +                     | +                       |

| HGNC Symbol | signDiff_1 5Tc vs 100Tc | signDiff_1Tc vs 100Tc | signDiff_0 5Tc vs 100Tc |
|-------------|-------------------------|-----------------------|-------------------------|
| UBE2C       | +                       | +                     | +                       |
| PTPN2       | +                       | +                     | +                       |
| RUVBL1      | +                       | +                     | +                       |
| TYMS        | +                       | +                     | +                       |
| DDX10       | +                       | +                     | +                       |
| TUFM        | +                       | +                     | +                       |
| AURKB       | +                       | +                     | +                       |
| RRS1        | +                       | +                     | +                       |
| GEMIN4      | +                       | +                     | +                       |
| PTMA        | +                       | +                     | +                       |
| CYP51A1     | +                       | +                     | +                       |
| ARHGEF5     | +                       | +                     | +                       |
| KIAA0690    | +                       | +                     | +                       |
| VDAC1       | +                       | +                     | +                       |
| DDX1        | +                       | +                     | +                       |
| SCAMP1      | +                       | +                     | +                       |
| DDX18       | +                       | +                     | +                       |
| PES1        | +                       | +                     | +                       |
| RANGAP1     | +                       | +                     | +                       |
| APEX1       | +                       | +                     | +                       |
| MYBL2       | +                       | +                     | +                       |
| USP10       | +                       | +                     | +                       |
| n.a.        | +                       | +                     | +                       |
| RPA3        | +                       | +                     | +                       |
| CXCL12      | +                       | +                     | +                       |
| n.a.        | +                       | +                     | +                       |
| MCM3        | +                       | +                     | +                       |
| GMNN        | +                       | +                     | +                       |
| HSPA9B      | +                       | +                     | +                       |
| TCERG1      | +                       | +                     | +                       |
| RNU3IP2     | +                       | +                     | +                       |
| SFRS7       | +                       | +                     | +                       |
| MSH6        | +                       | +                     | +                       |
| CENPF       | +                       | +                     | +                       |
| MXI1        | +                       | +                     | +                       |
| AMD1        | +                       | +                     | +                       |
| ELK1        | +                       | +                     | +                       |
| ILF3        | +                       | +                     | +                       |
| TFDP1       | +                       | +                     | +                       |
| n.a.        | +                       | +                     | +                       |
| TOP2A       | +                       | +                     | +                       |
| EIF5A       | +                       | +                     | +                       |
| n.a.        | +                       | +                     | +                       |
| n.a.        | +                       | +                     | +                       |
| ATIC        | +                       | +                     | +                       |
| ATIC        | +                       | +                     | +                       |
| PEX5        | +                       | +                     | +                       |
| TAF4B       | +                       | +                     | +                       |
| HDGF        | +                       | +                     | +                       |
| HDGF        | +                       | +                     | +                       |
| ILF2        | +                       | +                     | +                       |
| CCNA2       | +                       | +                     | +                       |
| MDH2        | +                       | +                     | +                       |
| PEG10       | +                       | +                     | +                       |
| PPRC1       | +                       | +                     | +                       |
| SSRP1       | +                       | +                     | +                       |
| PTK9        | +                       | +                     | +                       |

| HGNC Symbol | signDiff_1 5Tc vs 100Tc | signDiff_1Tc vs 100Tc | signDiff_0 5Tc vs 100Tc |
|-------------|-------------------------|-----------------------|-------------------------|
| ACSL1       | +                       | +                     | +                       |
| PFKM        | +                       | +                     | +                       |
| HNRPDL      | +                       | +                     | +                       |
| RPIA        | +                       | +                     | +                       |
| SLC16A1     | +                       | +                     | +                       |
| KCNJ6       | +                       | +                     | +                       |
| SFRS2       | +                       | +                     | +                       |
| PRKCI       | +                       | +                     | +                       |
| POLR2H      | +                       | +                     | +                       |
| ABCE1       | +                       | +                     | +                       |
| MELK        | +                       | +                     | +                       |
| DDX21       | +                       | +                     | +                       |
| SSSCA1      | +                       | +                     | +                       |
| n.a.        | +                       | +                     | +                       |
| HSPCA       | +                       | +                     | +                       |
| DEAF1       | +                       | +                     | +                       |
| n.a.        | +                       | +                     | +                       |
| EIF1AX      | +                       | +                     | +                       |
| n.a.        | +                       | +                     | +                       |
| n.a.        | +                       | +                     | +                       |
| SF3A3       | +                       | +                     | +                       |
| n.a.        | +                       | +                     | +                       |
| AK2         | +                       | +                     | +                       |
| PLAUR       | +                       | =                     | +                       |
| SCARB1      | +                       | +                     | +                       |
| MCM2        | +                       | +                     | +                       |
| EXOSC7      | +                       | +                     | +                       |
| KHSRP       | +                       | +                     | +                       |
| NUDC        | +                       | +                     | +                       |
| CGRRF1      | +                       | +                     | +                       |
| APEX1       | +                       | +                     | +                       |
| GARS        | +                       | +                     | +                       |
| EIF3S9      | +                       | +                     | +                       |
| IMPDH1      | +                       | +                     | +                       |
| VEGF        | +                       | +                     | +                       |
| TFDP2       | +                       | +                     | +                       |
| PRDX1       | +                       | +                     | +                       |
| SCO2        | +                       | +                     | +                       |
| TUBG1       | +                       | +                     | +                       |
| MYCN        | +                       | +                     | +                       |
| ABL2        | +                       | +                     | +                       |
| SLC20A1     | +                       | +                     | +                       |
| CDKN2B      | +                       | +                     | +                       |
| n.a.        | +                       | +                     | +                       |
| FANCG       | +                       | +                     | +                       |
| PMPCA       | +                       | +                     | +                       |
| PSMC3       | +                       | +                     | +                       |
| MCM7        | +                       | +                     | +                       |
| ABCA3       | +                       | +                     | +                       |
| EIF4EBP1    | +                       | +                     | +                       |
| TNFRSF4     | +                       | +                     | +                       |
| SRP72       | +                       | +                     | +                       |
| ALG3        | +                       | +                     | +                       |
| CKS1B       | +                       | +                     | +                       |
| NSEP1       | +                       | +                     | +                       |
| FARSLA      | +                       | +                     | +                       |
| PRIM1       | +                       | +                     | +                       |

| HGNC Symbol | signDiff_1 5Tc vs 100Tc | signDiff_1Tc vs 100Tc | signDiff_0 5Tc vs 100Tc |
|-------------|-------------------------|-----------------------|-------------------------|
| TBL3        | +                       | +                     | +                       |
| JUND        | =                       | +                     | +                       |
| PTBP1       | =                       | +                     | +                       |
| MRE11A      | =                       | +                     | +                       |
| HSPA5       | =                       | +                     | +                       |
| OAT         | =                       | +                     | +                       |
| TFRC        | =                       | +                     | +                       |
| SHMT1       | =                       | +                     | +                       |
| CLNS1A      | =                       | +                     | +                       |
| SEMA3C      | =                       | +                     | +                       |
| MCAM        | =                       | +                     | +                       |
| MAPKAPK5    | =                       | +                     | +                       |
| SIP1        | =                       | +                     | +                       |
| NF2         | =                       | +                     | +                       |
| SLC1A5      | =                       | +                     | +                       |
| PSMA2       | =                       | +                     | +                       |
| RAD51C      | =                       | +                     | +                       |
| CTSC        | =                       | +                     | +                       |
| HSPA8       | =                       | +                     | +                       |
| n.a.        | =                       | +                     | +                       |
| IGFBP2      | =                       | +                     | +                       |
| DARS        | =                       | +                     | +                       |
| UCHL3       | =                       | +                     | +                       |
| GTF3A       | =                       | +                     | +                       |
| RPL5        | +                       | +                     | +                       |
| AMD1        | =                       | +                     | +                       |
| HSPA1A      | =                       | +                     | +                       |
| SYNGR3      | =                       | +                     | +                       |
| NINJ1       | =                       | +                     | +                       |
| SNRPA1      | =                       | +                     | +                       |
| TAF9        | =                       | +                     | +                       |
| SYNCRIP     | +                       | +                     | +                       |
| n.a.        | =                       | +                     | +                       |
| ITGB3BP     | =                       | +                     | +                       |
| PTPRF       | =                       | +                     | +                       |
| CHEK1       | =                       | +                     | +                       |
| TCEB1       | =                       | +                     | +                       |
| n.a.        | =                       | +                     | +                       |
| VBP1        | =                       | +                     | +                       |
| BUB1B       | =                       | +                     | +                       |
| RACGAP1     | =                       | +                     | +                       |
| AK3         | =                       | +                     | +                       |
| HNRPF       | =                       | +                     | +                       |
| PDAP1       | =                       | +                     | +                       |
| SELE        | =                       | =                     | +                       |
| n.a.        | =                       | +                     | +                       |
| RCN1        | +                       | =                     | +                       |
| GLDC        | +                       | =                     | +                       |
| PMS1        | +                       | =                     | +                       |
| PFKP        | =                       | =                     | +                       |
| PDCD2       | =                       | =                     | +                       |
| MGST2       | =                       | =                     | +                       |
| NDUFB7      | =                       | =                     | +                       |
| G22P1       | =                       | +                     | +                       |
| n.a.        | =                       | =                     | +                       |
| PBEF1       | =                       | =                     | +                       |
| TBL2        | =                       | =                     | +                       |



| HGNC Symbol | signDiff_1 5Tc vs 100Tc | signDiff_1Tc vs 100Tc | signDiff_0 5Tc vs 100Tc |
|-------------|-------------------------|-----------------------|-------------------------|
| GCN5L2      | =                       | =                     | +                       |
| CDK2AP1     | =                       | =                     | +                       |
| NOL1        | =                       | +                     | +                       |
| SLC29A1     | =                       | =                     | +                       |
| BNIP1       | =                       | =                     | +                       |
| DBN1        | =                       | =                     | +                       |
| EIF4G1      | =                       | +                     | +                       |
| B4GALT2     | =                       | =                     | +                       |
| TMEM5       | =                       | =                     | +                       |
| FVT1        | =                       | =                     | +                       |
| ETF1        | +                       | =                     | +                       |
| ATF4        | =                       | =                     | +                       |
| ILF3        | =                       | =                     | +                       |
| RAMP1       | =                       | =                     | +                       |
| n.a.        | =                       | =                     | +                       |
| ADCY3       | =                       | =                     | +                       |
| AFG3L2      | =                       | =                     | +                       |
| PRPS1       | =                       | =                     | +                       |
| OPRS1       | +                       | =                     | +                       |
| TOMM70A     | =                       | =                     | +                       |
| APRT        | =                       | =                     | +                       |
| FGFR4       | =                       | =                     | +                       |
| DEFA6       | +                       | =                     | +                       |
| ZNF9        | +                       | =                     | +                       |
| RAC3        | +                       | =                     | +                       |
| WNT10B      | +                       | =                     | +                       |
| NFRKB       | =                       | =                     | +                       |
| CDK5R2      | =                       | =                     | +                       |
| CYCS        | +                       | =                     | +                       |
| YES1        | =                       | =                     | +                       |
| DLEU1       | =                       | =                     | +                       |
| BNIP3       | =                       | =                     | +                       |
| RAD23A      | =                       | =                     | +                       |
|             | =                       | =                     | +                       |
| UBE2G2      | =                       | =                     | =                       |
| KCNQ3       | =                       | =                     | =                       |
| MTA1        | =                       | =                     | =                       |
| LIG3        | =                       | =                     | =                       |
| ITGA2B      | =                       | =                     | +                       |
| TOMM34      | =                       | =                     | =                       |
| ITIH4       | =                       | =                     | =                       |
| POLD1       | =                       | =                     | =                       |
| IKBKAP      | =                       | =                     | =                       |
| ASNS        | =                       | =                     | =                       |
| MX1         | =                       | =                     | =                       |
| XRCC5       | +                       | +                     | =                       |
| XPO1        | =                       | =                     | =                       |
| RAD54L      | =                       | =                     | =                       |
| PTHLH       | -                       | =                     | =                       |
| MSH2        | =                       | =                     | +                       |
| CDKL1       | =                       | =                     | =                       |
| ADA         | =                       | =                     | =                       |
| n.a.        | =                       | =                     | =                       |
| TGFB1       | =                       | =                     | =                       |
| NPTX2       | =                       | =                     | =                       |
| BAG1        | =                       | =                     | =                       |
| BAG1        | =                       | =                     | =                       |

| HGNC Symbol | signDiff_1 5Tc vs 100Tc | signDiff_1Tc vs 100Tc | signDiff_0 5Tc vs 100Tc |
|-------------|-------------------------|-----------------------|-------------------------|
| SHB         | =                       | =                     | =                       |
| EIF3S10     | =                       | =                     | =                       |
| HTATIP2     | =                       | =                     | =                       |
| CALCA       | =                       | =                     | =                       |
| C6orf108    | =                       | =                     | =                       |
| ACY1        | =                       | =                     | =                       |
| PASK        | =                       | =                     | =                       |
| CEBPZ       | =                       | =                     | =                       |
| RAP1A       | =                       | =                     | =                       |
| NID         | =                       | =                     | =                       |
| IDE         | =                       | +                     | =                       |
| HOXB7       | =                       | =                     | =                       |
| GUCY1B2     | =                       | =                     | =                       |
| SERPINA7    | =                       | =                     | +                       |
| FPRL2       | =                       | =                     | =                       |
| MTRR        | =                       | =                     | =                       |
| THRA        | =                       | =                     | =                       |
| POR         | =                       | =                     | =                       |
| YWHAH       | =                       | =                     | =                       |
| TRIM28      | =                       | =                     | =                       |
| DHX30       | =                       | =                     | =                       |
| CDK8        | =                       | +                     | =                       |
| CCNH        | =                       | =                     | =                       |
| RFK         | +                       | +                     | +                       |
| RABGGTB     | =                       | =                     | =                       |
| PLK4        | =                       | =                     | =                       |
| CYP4B1      | =                       | =                     | =                       |
| TP53BP2     | =                       | =                     | =                       |
| NVL         | =                       | =                     | =                       |
| ARF1        | =                       | =                     | =                       |
| PLK2        | =                       | =                     | =                       |
| GZMA        | =                       | =                     | =                       |
| NOLA2       | =                       | =                     | =                       |
| HMBS        | =                       | +                     | =                       |
| ITIH2       | =                       | =                     | =                       |
| SACS        | =                       | =                     | =                       |
| GABPA       | =                       | =                     | =                       |
| ETS2        | =                       | =                     | =                       |
| IL8RA       | =                       | =                     | =                       |
| API5        | +                       | =                     | =                       |
| n.a.        | =                       | =                     | =                       |
| ICT1        | =                       | =                     | +                       |
| DFFB        | =                       | =                     | =                       |
| USP7        | =                       | =                     | =                       |
| PAP         | =                       | =                     | =                       |
| BSG         | =                       | =                     | =                       |
| YIF1        | =                       | =                     | +                       |
| POLE        | +                       | +                     | =                       |
|             | =                       | =                     | =                       |

| HGNC Symbol | signDiff_0Tc vs 100Tc | signEx_100Tc | signEx_8Tc | signEx_6Tc | signEx_5Tc |
|-------------|-----------------------|--------------|------------|------------|------------|
| MYC         | +                     | +            | +          | +          | +          |
| CACNA1G     | +                     | -            | -          | -          | +          |
| NME1        | +                     | +            | +          | +          | +          |
| ADCY2       | +                     | -            | -          | -          | +          |
| C4orf9      | +                     | -            | +          | -          | -          |
| FKBP5       | +                     | -            | +          | +          | +          |
| CRKL        | +                     | -            | -          | -          | -          |
| RFC5        | +                     | -            | -          | -          | -          |
| PPP2CA      | +                     | -            | +          | -          | +          |
| TIMM8A      | +                     | -            | -          | -          | +          |
| n.a.        | +                     | -            | -          | -          | -          |
| MAD2L1      | +                     | -            | -          | -          | -          |
| MRPL12      | +                     | +            | +          | +          | +          |
| NME1        | +                     | +            | +          | +          | +          |
| METTL1      | +                     | -            | +          | +          | +          |
| SLC7A5      | +                     | -            | +          | +          | +          |
| SRM         | +                     | +            | +          | +          | +          |
| IL1B        | +                     | +            | +          | +          | +          |
| PAICS       | +                     | +            | +          | +          | +          |
| TOMM40      | +                     | +            | +          | +          | +          |
| PYCR1       | +                     | +            | +          | +          | +          |
| UMPK        | +                     | +            | +          | +          | +          |
| LRP8        | +                     | -            | -          | +          | +          |
| DUSP14      | +                     | -            | -          | -          | +          |
| METAP1      | +                     | -            | +          | +          | +          |
| ABCE1       | +                     | -            | +          | +          | +          |
| PA2G4       | +                     | +            | +          | +          | +          |
| BOP1        | +                     | +            | +          | +          | +          |
| RANBP1      | +                     | +            | +          | +          | +          |
| CTPS        | +                     | +            | +          | +          | +          |
| TRAP1       | +                     | +            | +          | +          | +          |
| HSPD1       | +                     | +            | +          | +          | +          |
| PFAS        | +                     | +            | +          | +          | +          |
| TEAD4       | +                     | -            | +          | +          | +          |
| MIF         | +                     | +            | +          | +          | +          |
| VAR2        | +                     | +            | +          | +          | +          |
| CENTG1      | +                     | +            | +          | +          | +          |
| DSCR2       | +                     | +            | +          | +          | +          |
| JAG2        | +                     | +            | +          | +          | +          |
| PRKAR1B     | +                     | +            | +          | +          | +          |
| n.a.        | +                     | -            | -          | +          | +          |
| MATK        | +                     | -            | -          | +          | +          |
| IARS        | +                     | +            | +          | +          | +          |
| GAL         | +                     | +            | +          | +          | +          |
| MCAM        | +                     | -            | -          | -          | -          |
| CAD         | +                     | +            | +          | +          | +          |
| FH          | +                     | +            | +          | +          | +          |
| SRPK1       | +                     | +            | +          | +          | +          |
| NEFH        | +                     | -            | -          | -          | +          |
| NP          | +                     | +            | +          | +          | +          |
| AHCY        | +                     | +            | +          | +          | +          |
| POLD2       | +                     | +            | +          | +          | +          |
| C1QBP       | +                     | +            | +          | +          | +          |
| CAMKK2      | +                     | +            | +          | +          | +          |
| n.a.        | +                     | +            | +          | +          | +          |
| BYSL        | +                     | +            | +          | +          | +          |
| NUP155      | +                     | -            | -          | -          | +          |

| HGNC Symbol | signDiff_0Tc vs 100Tc | signEx_100Tc | signEx_8Tc | signEx_6Tc | signEx_5Tc |
|-------------|-----------------------|--------------|------------|------------|------------|
| IFRD2       | +                     | +            | +          | +          | +          |
| MRPL3       | +                     | +            | +          | +          | +          |
| HSPE1       | +                     | +            | +          | +          | +          |
| HSPE1       | +                     | +            | +          | +          | +          |
| n.a.        | +                     | +            | +          | +          | +          |
| EBNA1BP2    | +                     | +            | +          | +          | +          |
| TNFRSF8     | +                     | -            | -          | -          | -          |
| PRDX4       | +                     | +            | +          | +          | +          |
| CSE1L       | +                     | +            | +          | +          | +          |
| RPP40       | +                     | -            | -          | -          | +          |
| n.a.        | +                     | -            | -          | -          | -          |
| HRMT1L2     | +                     | +            | +          | +          | +          |
| n.a.        | +                     | -            | -          | +          | +          |
| n.a.        | +                     | +            | +          | +          | +          |
| MADH4       | +                     | +            | +          | +          | +          |
| IL9         | +                     | +            | +          | +          | +          |
| PDCD11      | +                     | +            | +          | +          | +          |
| HK2         | +                     | -            | -          | -          | -          |
| PWP2H       | +                     | +            | +          | +          | +          |
| n.a.        | +                     | -            | +          | -          | +          |
| NOLC1       | +                     | +            | +          | +          | +          |
| NOLC1       | +                     | +            | +          | +          | +          |
| CCT2        | +                     | +            | +          | +          | +          |
| DTYMK       | +                     | +            | +          | +          | +          |
| HNRPAB      | +                     | +            | +          | +          | +          |
| FASN        | +                     | +            | +          | +          | +          |
| FASN        | +                     | +            | +          | +          | +          |
| NMB         | +                     | -            | +          | +          | +          |
| CHC1        | +                     | -            | -          | -          | +          |
|             | +                     | +            | +          | +          | +          |
| KIAA0179    | +                     | +            | +          | +          | +          |
| NTHL1       | +                     | +            | +          | +          | +          |
| UNG         | +                     | +            | +          | +          | +          |
| KIAA0020    | +                     | +            | +          | +          | +          |
| n.a.        | +                     | +            | +          | +          | +          |
| n.a.        | +                     | +            | +          | +          | +          |
| POLE2       | +                     | -            | +          | +          | +          |
| MTHFD1      | +                     | +            | +          | +          | +          |
| NOL5A       | +                     | +            | +          | +          | +          |
| PRPS2       | +                     | +            | +          | +          | +          |
| RUVBL2      | +                     | +            | +          | +          | +          |
| GPI         | +                     | +            | +          | +          | +          |
| n.a.        | +                     | +            | +          | +          | +          |
| NPM3        | +                     | +            | +          | +          | +          |
| n.a.        | +                     | +            | +          | +          | +          |
| CDC20       | +                     | +            | +          | +          | +          |
| n.a.        | +                     | +            | +          | +          | +          |
| PRKDC       | +                     | -            | -          | -          | +          |
| CKS2        | +                     | +            | +          | +          | +          |
| CSE1L       | +                     | +            | +          | +          | +          |
| EEF1E1      | +                     | +            | +          | +          | +          |
| HRMT1L2     | +                     | +            | +          | +          | +          |
| n.a.        | +                     | +            | +          | +          | +          |
| TST         | +                     | -            | +          | +          | +          |
| DKC1        | +                     | +            | +          | +          | +          |
| RAN         | +                     | +            | +          | +          | +          |
| PDGFRA      | +                     | -            | +          | +          | +          |

| HGNC Symbol | signDiff_0Tc vs 100Tc | signEx_100Tc | signEx_8Tc | signEx_6Tc | signEx_5Tc |
|-------------|-----------------------|--------------|------------|------------|------------|
| CDK4        | +                     | -            | -          | -          | -          |
| ALDH1B1     | +                     | -            | +          | +          | +          |
| SORD        | +                     | +            | +          | +          | +          |
| BDH         | +                     | +            | +          | +          | +          |
| GMPS        | +                     | +            | +          | +          | +          |
| GPR30       | +                     | +            | +          | +          | +          |
| PHB         | +                     | +            | +          | +          | +          |
| STRA13      | +                     | +            | +          | +          | +          |
| XPOT        | +                     | +            | +          | +          | +          |
| SMN1        | +                     | +            | +          | +          | +          |
| CHC1        | +                     | +            | +          | +          | +          |
| PLK1        | +                     | +            | +          | +          | +          |
| n.a.        | +                     | -            | +          | +          | +          |
| AK2         | +                     | +            | +          | +          | +          |
| n.a.        | +                     | +            | +          | +          | +          |
| MGST1       | +                     | +            | +          | +          | +          |
| CSDA        | +                     | +            | +          | +          | +          |
| n.a.        | +                     | +            | +          | +          | +          |
| ATP1B3      | +                     | +            | +          | +          | +          |
| BCS1L       | +                     | +            | +          | +          | +          |
| UNG         | +                     | +            | +          | +          | +          |
| PBP         | +                     | +            | +          | +          | +          |
| CDC6        | +                     | +            | +          | +          | +          |
| CDC7        | +                     | +            | +          | +          | +          |
| MTAP        | +                     | -            | -          | +          | +          |
| ADSL        | +                     | +            | +          | +          | +          |
| CDKN3       | +                     | +            | +          | +          | +          |
| VRK1        | +                     | +            | +          | +          | +          |
| WFDC2       | +                     | +            | +          | +          | +          |
| GSPT1       | +                     | +            | +          | +          | +          |
| SLC39A14    | +                     | +            | +          | +          | +          |
| n.a.        | +                     | +            | +          | +          | +          |
| RLN2        | +                     | +            | +          | +          | +          |
| BAG2        | +                     | +            | +          | +          | +          |
| HSD17B8     | +                     | +            | +          | +          | +          |
| UCHL3       | +                     | +            | +          | +          | +          |
| NME2        | +                     | +            | +          | +          | +          |
| MRPS12      | +                     | +            | +          | +          | +          |
| PCNA        | +                     | +            | +          | +          | +          |
| DPH2L2      | +                     | +            | +          | +          | +          |
| CCNB1       | +                     | +            | +          | +          | +          |
| MC1R        | +                     | +            | +          | +          | +          |
| SOD1        | +                     | +            | +          | +          | +          |
| ATP5G3      | +                     | +            | +          | +          | +          |
| CCT3        | +                     | +            | +          | +          | +          |
| RFC4        | +                     | +            | +          | +          | +          |
| CDC25A      | +                     | -            | +          | +          | +          |
| FRDA        | +                     | +            | +          | +          | +          |
| SNRPD1      | +                     | +            | +          | +          | +          |
| CHAF1A      | +                     | +            | +          | +          | +          |
| PRDX2       | +                     | +            | +          | +          | +          |
| BUB1        | +                     | +            | +          | +          | +          |
| CDC2        | +                     | +            | +          | +          | +          |
| POLR1C      | +                     | +            | +          | +          | +          |
| SLC19A1     | +                     | -            | -          | -          | +          |
| TOMM20      | +                     | +            | +          | +          | +          |
| MMP3        | +                     | -            | +          | +          | +          |

| HGNC Symbol | signDiff_0Tc vs 100Tc | signEx_100Tc | signEx_8Tc | signEx_6Tc | signEx_5Tc |
|-------------|-----------------------|--------------|------------|------------|------------|
| UBE2C       | +                     | +            | +          | +          | +          |
| PTPN2       | +                     | +            | +          | +          | +          |
| RUVBL1      | +                     | +            | +          | +          | +          |
| TYMS        | +                     | +            | +          | +          | +          |
| DDX10       | +                     | +            | +          | +          | +          |
| TUFM        | +                     | +            | +          | +          | +          |
| AURKB       | +                     | +            | +          | +          | +          |
| RRS1        | +                     | +            | +          | +          | +          |
| GEMIN4      | +                     | +            | +          | +          | +          |
| PTMA        | +                     | +            | +          | +          | +          |
| CYP51A1     | +                     | +            | +          | +          | +          |
| ARHGEF5     | +                     | -            | -          | -          | -          |
| KIAA0690    | +                     | +            | +          | +          | +          |
| VDAC1       | +                     | +            | +          | +          | +          |
| DDX1        | +                     | +            | +          | +          | +          |
| SCAMP1      | +                     | +            | +          | +          | +          |
| DDX18       | +                     | +            | +          | +          | +          |
| PES1        | +                     | +            | +          | +          | +          |
| RANGAP1     | +                     | +            | +          | +          | +          |
| APEX1       | +                     | +            | +          | +          | +          |
| MYBL2       | +                     | +            | +          | +          | +          |
| USP10       | +                     | +            | +          | +          | +          |
| n.a.        | +                     | -            | -          | +          | +          |
| RPA3        | +                     | +            | +          | +          | +          |
| CXCL12      | +                     | -            | +          | +          | +          |
| n.a.        | +                     | -            | -          | +          | -          |
| MCM3        | +                     | +            | +          | +          | +          |
| GMNN        | +                     | +            | +          | +          | +          |
| HSPA9B      | +                     | +            | +          | +          | +          |
| TCERG1      | +                     | +            | +          | +          | +          |
| RNU3IP2     | +                     | +            | +          | +          | +          |
| SFRS7       | +                     | +            | +          | +          | +          |
| MSH6        | +                     | +            | +          | +          | +          |
| CENPF       | +                     | +            | +          | +          | +          |
| MXI1        | +                     | +            | +          | +          | +          |
| AMD1        | +                     | +            | +          | +          | +          |
| ELK1        | +                     | +            | +          | +          | +          |
| ILF3        | +                     | +            | +          | +          | +          |
| TFDP1       | +                     | +            | +          | +          | +          |
| n.a.        | +                     | +            | +          | +          | +          |
| TOP2A       | +                     | +            | +          | +          | +          |
| EIF5A       | +                     | +            | +          | +          | +          |
| n.a.        | +                     | -            | -          | -          | -          |
| n.a.        | +                     | +            | +          | +          | +          |
| ATIC        | +                     | +            | +          | +          | +          |
| ATIC        | +                     | +            | +          | +          | +          |
| PEX5        | +                     | +            | +          | +          | +          |
| TAF4B       | +                     | +            | +          | +          | +          |
| HDGF        | +                     | +            | +          | +          | +          |
| HDGF        | +                     | +            | +          | +          | +          |
| ILF2        | +                     | +            | +          | +          | +          |
| CCNA2       | +                     | +            | +          | +          | +          |
| MDH2        | +                     | +            | +          | +          | +          |
| PEG10       | +                     | -            | -          | +          | +          |
| PPRC1       | +                     | +            | +          | +          | +          |
| SSRP1       | +                     | +            | +          | +          | +          |
| PTK9        | +                     | -            | -          | -          | -          |

| HGNC Symbol | signDiff_0Tc vs 100Tc | signEx_100Tc | signEx_8Tc | signEx_6Tc | signEx_5Tc |
|-------------|-----------------------|--------------|------------|------------|------------|
| ACSL1       | +                     | +            | +          | +          | +          |
| PFKM        | +                     | +            | +          | +          | +          |
| HNRPDL      | +                     | +            | +          | +          | +          |
| RPIA        | +                     | +            | +          | +          | +          |
| SLC16A1     | +                     | -            | -          | -          | -          |
| KCNJ6       | +                     | +            | +          | +          | +          |
| SFRS2       | +                     | +            | +          | +          | +          |
| PRKCI       | +                     | -            | -          | +          | -          |
| POLR2H      | +                     | +            | +          | +          | +          |
| ABCE1       | +                     | -            | -          | -          | +          |
| MELK        | +                     | +            | +          | +          | +          |
| DDX21       | +                     | -            | -          | +          | +          |
| SSSCA1      | +                     | +            | +          | +          | +          |
| n.a.        | +                     | +            | +          | +          | +          |
| HSPCA       | +                     | +            | +          | +          | +          |
| DEAF1       | +                     | +            | +          | +          | +          |
| n.a.        | +                     | +            | +          | +          | +          |
| EIF1AX      | +                     | +            | +          | +          | +          |
| n.a.        | +                     | +            | +          | +          | +          |
| n.a.        | +                     | +            | +          | +          | +          |
| SF3A3       | +                     | +            | +          | +          | +          |
| n.a.        | +                     | -            | -          | -          | -          |
| AK2         | +                     | +            | +          | +          | +          |
| PLAUR       | +                     | -            | -          | +          | +          |
| SCARB1      | +                     | +            | +          | +          | +          |
| MCM2        | +                     | +            | +          | +          | +          |
| EXOSC7      | +                     | +            | +          | +          | +          |
| KHSRP       | +                     | +            | +          | +          | +          |
| NUDC        | +                     | +            | +          | +          | +          |
| CGRRF1      | +                     | +            | +          | +          | +          |
| APEX1       | +                     | +            | +          | +          | +          |
| GARS        | +                     | +            | +          | +          | +          |
| EIF3S9      | +                     | +            | +          | +          | +          |
| IMPDH1      | +                     | +            | +          | +          | +          |
| VEGF        | +                     | -            | -          | -          | -          |
| TFDP2       | +                     | +            | +          | +          | +          |
| PRDX1       | +                     | +            | +          | +          | +          |
| SCO2        | +                     | +            | +          | +          | +          |
| TUBG1       | +                     | +            | +          | +          | +          |
| MYCN        | +                     | +            | +          | +          | +          |
| ABL2        | +                     | -            | -          | -          | -          |
| SLC20A1     | +                     | +            | +          | +          | +          |
| CDKN2B      | +                     | -            | -          | +          | -          |
| n.a.        | +                     | +            | +          | +          | +          |
| FANCG       | +                     | +            | +          | +          | +          |
| PMPCA       | +                     | +            | +          | +          | +          |
| PSMC3       | +                     | +            | +          | +          | +          |
| MCM7        | +                     | +            | +          | +          | +          |
| ABCA3       | +                     | +            | +          | +          | +          |
| EIF4EBP1    | +                     | +            | +          | +          | +          |
| TNFRSF4     | +                     | -            | -          | -          | -          |
| SRP72       | +                     | +            | +          | +          | +          |
| ALG3        | +                     | +            | +          | +          | +          |
| CKS1B       | +                     | +            | +          | +          | +          |
| NSEP1       | +                     | +            | +          | +          | +          |
| FARSLA      | +                     | +            | +          | +          | +          |
| PRIM1       | +                     | +            | +          | +          | +          |

| HGNC Symbol | signDiff_0Tc vs 100Tc | signEx_100Tc | signEx_8Tc | signEx_6Tc | signEx_5Tc |
|-------------|-----------------------|--------------|------------|------------|------------|
| TBL3        | +                     | +            | +          | +          | +          |
| JUND        | +                     | +            | +          | +          | +          |
| PTBP1       | +                     | +            | +          | +          | +          |
| MRE11A      | +                     | +            | +          | +          | +          |
| HSPA5       | +                     | +            | +          | +          | +          |
| OAT         | +                     | +            | +          | +          | +          |
| TFRC        | +                     | +            | +          | +          | +          |
| SHMT1       | +                     | -            | -          | +          | +          |
| CLNS1A      | +                     | +            | +          | +          | +          |
| SEMA3C      | +                     | -            | -          | -          | -          |
| MCAM        | +                     | +            | +          | +          | +          |
| MAPKAPK5    | +                     | +            | +          | +          | +          |
| SIP1        | +                     | -            | +          | +          | +          |
| NF2         | +                     | +            | +          | +          | +          |
| SLC1A5      | +                     | +            | +          | +          | +          |
| PSMA2       | +                     | +            | +          | +          | +          |
| RAD51C      | +                     | +            | +          | +          | +          |
| CTSC        | +                     | +            | +          | +          | +          |
| HSPA8       | +                     | +            | +          | +          | +          |
| n.a.        | +                     | -            | -          | -          | +          |
| IGFBP2      | +                     | +            | +          | +          | +          |
| DARS        | +                     | +            | +          | +          | +          |
| UCHL3       | +                     | +            | +          | +          | +          |
| GTF3A       | +                     | +            | +          | +          | +          |
| RPL5        | +                     | +            | +          | +          | +          |
| AMD1        | +                     | +            | +          | +          | +          |
| HSPA1A      | +                     | -            | +          | +          | -          |
| SYNGR3      | +                     | +            | +          | +          | +          |
| NINJ1       | +                     | -            | -          | -          | -          |
| SNRPA1      | +                     | +            | +          | +          | +          |
| TAF9        | +                     | +            | +          | +          | +          |
| SYNCRIP     | +                     | +            | +          | +          | +          |
| n.a.        | +                     | +            | +          | +          | +          |
| ITGB3BP     | +                     | +            | +          | +          | +          |
| PTPRF       | +                     | -            | +          | -          | +          |
| CHEK1       | +                     | +            | +          | +          | +          |
| TCEB1       | +                     | +            | +          | +          | +          |
| n.a.        | +                     | +            | +          | +          | +          |
| VBP1        | +                     | +            | +          | +          | +          |
| BUB1B       | +                     | +            | +          | +          | +          |
| RACGAP1     | +                     | +            | +          | +          | +          |
| AK3         | +                     | -            | +          | -          | +          |
| HNRPF       | +                     | +            | +          | +          | +          |
| PDAP1       | +                     | +            | +          | +          | +          |
| SELE        | +                     | +            | +          | +          | +          |
| n.a.        | +                     | +            | +          | +          | +          |
| RCN1        | +                     | -            | -          | -          | -          |
| GLDC        | +                     | +            | -          | +          | +          |
| PMS1        | +                     | -            | -          | -          | -          |
| PFKP        | +                     | +            | +          | +          | +          |
| PDCD2       | +                     | +            | +          | +          | +          |
| MGST2       | +                     | +            | +          | +          | +          |
| NDUFB7      | +                     | +            | +          | +          | +          |
| G22P1       | +                     | +            | +          | +          | +          |
| n.a.        | +                     | +            | +          | +          | +          |
| PBEF1       | +                     | -            | -          | -          | -          |
| TBL2        | +                     | +            | +          | +          | +          |



| HGNC Symbol | signDiff_0Tc vs 100Tc | signEx_100Tc | signEx_8Tc | signEx_6Tc | signEx_5Tc |
|-------------|-----------------------|--------------|------------|------------|------------|
| GCN5L2      | +                     | +            | +          | +          | +          |
| CDK2AP1     | +                     | +            | +          | +          | +          |
| NOL1        | +                     | +            | +          | +          | +          |
| SLC29A1     | +                     | +            | +          | +          | +          |
| BNIP1       | +                     | -            | +          | +          | +          |
| DBN1        | +                     | +            | +          | +          | +          |
| EIF4G1      | +                     | +            | +          | +          | +          |
| B4GALT2     | +                     | -            | -          | +          | +          |
| TMEM5       | +                     | +            | +          | +          | +          |
| FVT1        | +                     | -            | -          | -          | -          |
| ETF1        | +                     | -            | -          | +          | +          |
| ATF4        | +                     | +            | +          | +          | +          |
| ILF3        | +                     | +            | +          | +          | +          |
| RAMP1       | +                     | +            | +          | +          | +          |
| n.a.        | +                     | +            | +          | +          | +          |
| ADCY3       | +                     | +            | +          | +          | +          |
| AFG3L2      | +                     | +            | +          | +          | +          |
| PRPS1       | +                     | +            | +          | +          | +          |
| OPRS1       | +                     | -            | -          | -          | -          |
| TOMM70A     | +                     | +            | +          | +          | +          |
| APRT        | +                     | +            | +          | +          | +          |
| FGFR4       | +                     | -            | -          | -          | -          |
| DEFA6       | +                     | -            | -          | +          | -          |
| ZNF9        | +                     | -            | +          | +          | +          |
| RAC3        | +                     | -            | -          | -          | -          |
| WNT10B      | +                     | -            | -          | -          | +          |
| NFRKB       | +                     | -            | +          | +          | -          |
| CDK5R2      | +                     | -            | -          | -          | -          |
| CYCS        | +                     | -            | -          | -          | -          |
| YES1        | +                     | +            | +          | +          | +          |
| DLEU1       | +                     | +            | +          | +          | +          |
| BNIP3       | +                     | +            | +          | +          | +          |
| RAD23A      | +                     | +            | +          | +          | +          |
|             | +                     | -            | -          | -          | +          |
| UBE2G2      | +                     | +            | +          | +          | +          |
| KCNQ3       | +                     | -            | -          | -          | -          |
| MTA1        | +                     | +            | +          | +          | +          |
| LIG3        | +                     | +            | +          | +          | +          |
| ITGA2B      | +                     | -            | -          | -          | +          |
| TOMM34      | +                     | -            | -          | -          | -          |
| ITIH4       | +                     | +            | +          | +          | +          |
| POLD1       | +                     | +            | +          | +          | +          |
| IKBKAP      | +                     | +            | +          | +          | +          |
| ASNS        | +                     | +            | +          | +          | +          |
| MX1         | +                     | -            | -          | -          | -          |
| XRCC5       | +                     | -            | +          | +          | +          |
| XPO1        | +                     | +            | +          | +          | +          |
| RAD54L      | +                     | +            | +          | +          | +          |
| PTHLH       | +                     | -            | -          | -          | -          |
| MSH2        | +                     | +            | +          | +          | +          |
| CDKL1       | +                     | +            | +          | +          | +          |
| ADA         | +                     | +            | +          | +          | +          |
| n.a.        | +                     | +            | +          | +          | +          |
| TGFB1       | +                     | -            | -          | -          | -          |
| NPTX2       | +                     | -            | -          | -          | -          |
| BAG1        | +                     | +            | +          | +          | +          |
| BAG1        | +                     | +            | +          | +          | +          |

| HGNC Symbol | signDiff_0Tc vs 100Tc | signEx_100Tc | signEx_8Tc | signEx_6Tc | signEx_5Tc |
|-------------|-----------------------|--------------|------------|------------|------------|
| SHB         | +                     | +            | +          | +          | +          |
| EIF3S10     | +                     | +            | +          | +          | +          |
| HTATIP2     | +                     | -            | -          | -          | -          |
| CALCA       | +                     | -            | -          | -          | +          |
| C6orf108    | +                     | +            | +          | +          | +          |
| ACY1        | +                     | +            | +          | +          | +          |
| PASK        | +                     | -            | -          | -          | -          |
| CEBPZ       | +                     | +            | +          | +          | +          |
| RAP1A       | +                     | +            | +          | -          | +          |
| NID         | +                     | -            | -          | -          | -          |
| IDE         | +                     | +            | +          | +          | +          |
| HOXB7       | +                     | -            | +          | -          | -          |
| GUCY1B2     | +                     | +            | +          | +          | +          |
| SERPINA7    | +                     | +            | +          | +          | +          |
| FPRL2       | +                     | -            | +          | +          | +          |
| MTRR        | +                     | +            | +          | +          | +          |
| THRA        | +                     | +            | +          | +          | +          |
| POR         | +                     | +            | +          | +          | +          |
| YWHAH       | +                     | +            | +          | +          | +          |
| TRIM28      | +                     | +            | +          | +          | +          |
| DHX30       | +                     | +            | +          | +          | +          |
| CDK8        | +                     | +            | -          | +          | +          |
| CCNH        | +                     | +            | +          | +          | +          |
| RFK         | +                     | +            | +          | +          | +          |
| RABGGTB     | +                     | +            | +          | +          | +          |
| PLK4        | +                     | +            | +          | +          | +          |
| CYP4B1      | +                     | -            | -          | -          | -          |
| TP53BP2     | +                     | -            | +          | +          | +          |
| NVL         | +                     | +            | +          | +          | +          |
| ARF1        | +                     | +            | +          | +          | +          |
| PLK2        | +                     | +            | +          | +          | +          |
| GZMA        | +                     | -            | -          | -          | -          |
| NOLA2       | +                     | +            | +          | +          | +          |
| HMBS        | +                     | +            | +          | +          | +          |
| ITIH2       | +                     | -            | -          | -          | -          |
| SACS        | +                     | +            | -          | +          | +          |
| GABPA       | +                     | +            | +          | +          | +          |
| ETS2        | +                     | +            | +          | +          | +          |
| IL8RA       | +                     | +            | +          | +          | +          |
| API5        | +                     | -            | -          | +          | +          |
| n.a.        | +                     | +            | +          | +          | +          |
| ICT1        | +                     | +            | +          | +          | +          |
| DFFB        | +                     | +            | +          | +          | +          |
| USP7        | +                     | +            | +          | +          | +          |
| PAP         | +                     | +            | +          | +          | +          |
| BSG         | +                     | +            | +          | +          | +          |
| YIF1        | +                     | +            | +          | +          | +          |
| POLE        | +                     | +            | +          | +          | +          |
|             | +                     | -            | -          | -          | +          |

| HGNC Symbol | signEx_4Tc | signEx_3Tc | signEx_2Tc | signEx_1 5Tc | signEx_1Tc |
|-------------|------------|------------|------------|--------------|------------|
| MYC         | +          | +          | +          | +            | +          |
| CACNA1G     | -          | -          | -          | +            | -          |
| NME1        | +          | +          | +          | +            | +          |
| ADCY2       | -          | -          | -          | -            | -          |
| C4orf9      | +          | +          | +          | +            | +          |
| FKBP5       | +          | +          | +          | +            | +          |
| CRKL        | -          | -          | +          | -            | +          |
| RFC5        | -          | +          | +          | +            | +          |
| PPP2CA      | +          | +          | +          | +            | +          |
| TIMM8A      | +          | +          | -          | +            | +          |
| n.a.        | -          | +          | -          | -            | +          |
| MAD2L1      | -          | -          | +          | +            | +          |
| MRPL12      | +          | +          | +          | +            | +          |
| NME1        | +          | +          | +          | +            | +          |
| METTL1      | +          | +          | +          | +            | +          |
| SLC7A5      | +          | +          | +          | +            | +          |
| SRM         | +          | +          | +          | +            | +          |
| IL1B        | +          | +          | +          | +            | +          |
| PAICS       | +          | +          | +          | +            | +          |
| TOMM40      | +          | +          | +          | +            | +          |
| PYCR1       | +          | +          | +          | +            | +          |
| UMPK        | +          | +          | +          | +            | +          |
| LRP8        | +          | +          | +          | +            | +          |
| DUSP14      | -          | +          | +          | -            | +          |
| METAP1      | +          | +          | +          | +            | +          |
| ABCE1       | +          | +          | +          | +            | +          |
| PA2G4       | +          | +          | +          | +            | +          |
| BOP1        | +          | +          | +          | +            | +          |
| RANBP1      | +          | +          | +          | +            | +          |
| CTPS        | +          | +          | +          | +            | +          |
| TRAP1       | +          | +          | +          | +            | +          |
| HSPD1       | +          | +          | +          | +            | +          |
| PFAS        | +          | +          | +          | +            | +          |
| TEAD4       | +          | +          | +          | +            | +          |
| MIF         | +          | +          | +          | +            | +          |
| VARS2       | +          | +          | +          | +            | +          |
| CENTG1      | +          | +          | +          | +            | +          |
| DSCR2       | +          | +          | +          | +            | +          |
| JAG2        | +          | +          | +          | +            | +          |
| PRKAR1B     | +          | +          | +          | +            | +          |
| n.a.        | +          | +          | +          | +            | +          |
| MATK        | +          | +          | +          | +            | +          |
| IARS        | +          | +          | +          | +            | +          |
| GAL         | +          | +          | +          | +            | +          |
| MCAM        | -          | -          | -          | +            | +          |
| CAD         | +          | +          | +          | +            | +          |
| FH          | +          | +          | +          | +            | +          |
| SRPK1       | +          | +          | +          | +            | +          |
| NEFH        | +          | +          | +          | +            | +          |
| NP          | +          | +          | +          | +            | +          |
| AHCY        | +          | +          | +          | +            | +          |
| POLD2       | +          | +          | +          | +            | +          |
| C1QBP       | +          | +          | +          | +            | +          |
| CAMKK2      | +          | +          | +          | +            | +          |
| n.a.        | +          | +          | +          | +            | +          |
| BYSL        | +          | +          | +          | +            | +          |
| NUP155      | +          | +          | +          | +            | +          |

| HGNC Symbol | signEx_4Tc | signEx_3Tc | signEx_2Tc | signEx_1 5Tc | signEx_1Tc |
|-------------|------------|------------|------------|--------------|------------|
| IFRD2       | +          | +          | +          | +            | +          |
| MRPL3       | +          | +          | +          | +            | +          |
| HSPE1       | +          | +          | +          | +            | +          |
| HSPE1       | +          | +          | +          | +            | +          |
| n.a.        | +          | +          | +          | +            | +          |
| EBNA1BP2    | +          | +          | +          | +            | +          |
| TNFRSF8     | +          | +          | +          | +            | +          |
| PRDX4       | +          | +          | +          | +            | +          |
| CSE1L       | +          | +          | +          | +            | +          |
| RPP40       | +          | +          | +          | +            | +          |
| n.a.        | +          | +          | -          | +            | +          |
| HRMT1L2     | +          | +          | +          | +            | +          |
| n.a.        | +          | +          | +          | +            | +          |
| n.a.        | +          | +          | +          | +            | +          |
| MADH4       | +          | +          | +          | +            | +          |
| IL9         | +          | +          | +          | +            | +          |
| PDCD11      | +          | +          | +          | +            | +          |
| HK2         | -          | -          | +          | +            | +          |
| PWP2H       | +          | +          | +          | +            | +          |
| n.a.        | +          | +          | +          | +            | +          |
| NOLC1       | +          | +          | +          | +            | +          |
| NOLC1       | +          | +          | +          | +            | +          |
| CCT2        | +          | +          | +          | +            | +          |
| DTYMK       | +          | +          | +          | +            | +          |
| HNRPAB      | +          | +          | +          | +            | +          |
| FASN        | +          | +          | +          | +            | +          |
| FASN        | +          | +          | +          | +            | +          |
| NMB         | +          | +          | +          | +            | +          |
| CHC1        | +          | +          | +          | +            | +          |
|             | +          | +          | +          | +            | +          |
| KIAA0179    | +          | +          | +          | +            | +          |
| NTHL1       | +          | +          | +          | +            | +          |
| UNG         | +          | +          | +          | +            | +          |
| KIAA0020    | +          | +          | +          | +            | +          |
| n.a.        | +          | +          | +          | +            | +          |
| n.a.        | +          | +          | +          | +            | +          |
| POLE2       | +          | +          | +          | +            | +          |
| MTHFD1      | +          | +          | +          | +            | +          |
| NOL5A       | +          | +          | +          | +            | +          |
| PRPS2       | +          | +          | +          | +            | +          |
| RUVBL2      | +          | +          | +          | +            | +          |
| GPI         | +          | +          | +          | +            | +          |
| n.a.        | +          | +          | +          | +            | +          |
| NPM3        | +          | +          | +          | +            | +          |
| n.a.        | +          | +          | +          | +            | +          |
| CDC20       | +          | +          | +          | +            | +          |
| n.a.        | +          | +          | +          | +            | +          |
| PRKDC       | +          | +          | +          | +            | +          |
| CKS2        | +          | +          | +          | +            | +          |
| CSE1L       | +          | +          | +          | +            | +          |
| EEF1E1      | +          | +          | +          | +            | +          |
| HRMT1L2     | +          | +          | +          | +            | +          |
| n.a.        | +          | +          | +          | +            | +          |
| TST         | +          | +          | +          | +            | +          |
| DKC1        | +          | +          | +          | +            | +          |
| RAN         | +          | +          | +          | +            | +          |
| PDGFRA      | +          | +          | +          | +            | +          |

| HGNC Symbol | signEx_4Tc | signEx_3Tc | signEx_2Tc | signEx_1 5Tc | signEx_1Tc |
|-------------|------------|------------|------------|--------------|------------|
| CDK4        | -          | -          | -          | -            | -          |
| ALDH1B1     | +          | +          | +          | +            | +          |
| SORD        | +          | +          | +          | +            | +          |
| BDH         | +          | +          | +          | +            | +          |
| GMPS        | +          | +          | +          | +            | +          |
| GPR30       | +          | +          | +          | +            | +          |
| PHB         | +          | +          | +          | +            | +          |
| STRA13      | +          | +          | +          | +            | +          |
| XPOT        | +          | +          | +          | +            | +          |
| SMN1        | +          | +          | +          | +            | +          |
| CHC1        | +          | +          | +          | +            | +          |
| PLK1        | +          | +          | +          | +            | +          |
| n.a.        | +          | +          | +          | +            | +          |
| AK2         | +          | +          | +          | +            | +          |
| n.a.        | +          | +          | +          | +            | +          |
| MGST1       | +          | +          | +          | +            | +          |
| CSDA        | +          | +          | +          | +            | +          |
| n.a.        | +          | +          | +          | +            | +          |
| ATP1B3      | +          | +          | +          | +            | +          |
| BCS1L       | +          | +          | +          | +            | +          |
| UNG         | +          | +          | +          | +            | +          |
| PBP         | +          | +          | +          | +            | +          |
| CDC6        | +          | +          | +          | +            | +          |
| CDC7        | +          | +          | +          | +            | +          |
| MTAP        | +          | +          | +          | +            | +          |
| ADSL        | +          | +          | +          | +            | +          |
| CDKN3       | +          | +          | +          | +            | +          |
| VRK1        | +          | +          | +          | +            | +          |
| WFDC2       | +          | +          | +          | +            | +          |
| GSPT1       | +          | +          | +          | +            | +          |
| SLC39A14    | +          | +          | +          | +            | +          |
| n.a.        | +          | +          | +          | +            | +          |
| RLN2        | +          | +          | +          | +            | +          |
| BAG2        | +          | +          | +          | +            | +          |
| HSD17B8     | +          | +          | +          | +            | +          |
| UCHL3       | +          | +          | +          | +            | +          |
| NME2        | +          | +          | +          | +            | +          |
| MRPS12      | +          | +          | +          | +            | +          |
| PCNA        | +          | +          | +          | +            | +          |
| DPH2L2      | +          | +          | +          | +            | +          |
| CCNB1       | +          | +          | +          | +            | +          |
| MC1R        | +          | +          | +          | +            | +          |
| SOD1        | +          | +          | +          | +            | +          |
| ATP5G3      | +          | +          | +          | +            | +          |
| CCT3        | +          | +          | +          | +            | +          |
| RFC4        | +          | +          | +          | +            | +          |
| CDC25A      | +          | +          | +          | +            | +          |
| FRDA        | +          | +          | +          | +            | +          |
| SNRPD1      | +          | +          | +          | +            | +          |
| CHAF1A      | +          | +          | +          | +            | +          |
| PRDX2       | +          | +          | +          | +            | +          |
| BUB1        | +          | +          | +          | +            | +          |
| CDC2        | +          | +          | +          | +            | +          |
| POLR1C      | +          | +          | +          | +            | +          |
| SLC19A1     | +          | +          | +          | +            | +          |
| TOMM20      | +          | +          | +          | +            | +          |
| MMP3        | +          | +          | +          | +            | +          |

| HGNC Symbol | signEx_4Tc | signEx_3Tc | signEx_2Tc | signEx_1 5Tc | signEx_1Tc |
|-------------|------------|------------|------------|--------------|------------|
| UBE2C       | +          | +          | +          | +            | +          |
| PTPN2       | +          | +          | +          | +            | +          |
| RUVBL1      | +          | +          | +          | +            | +          |
| TYMS        | +          | +          | +          | +            | +          |
| DDX10       | +          | +          | +          | +            | +          |
| TUFM        | +          | +          | +          | +            | +          |
| AURKB       | +          | +          | +          | +            | +          |
| RRS1        | +          | +          | +          | +            | +          |
| GEMIN4      | +          | +          | +          | +            | +          |
| PTMA        | +          | +          | +          | +            | +          |
| CYP51A1     | +          | +          | +          | +            | +          |
| ARHGEF5     | -          | -          | -          | +            | +          |
| KIAA0690    | +          | +          | +          | +            | +          |
| VDAC1       | +          | +          | +          | +            | +          |
| DDX1        | +          | +          | +          | +            | +          |
| SCAMP1      | +          | +          | +          | +            | +          |
| DDX18       | +          | +          | +          | +            | +          |
| PES1        | +          | +          | +          | +            | +          |
| RANGAP1     | +          | +          | +          | +            | +          |
| APEX1       | +          | +          | +          | +            | +          |
| MYBL2       | +          | +          | +          | +            | +          |
| USP10       | +          | +          | +          | +            | +          |
| n.a.        | +          | +          | +          | +            | +          |
| RPA3        | +          | +          | +          | +            | +          |
| CXCL12      | +          | +          | +          | +            | +          |
| n.a.        | +          | +          | +          | +            | +          |
| MCM3        | +          | +          | +          | +            | +          |
| GMNN        | +          | +          | +          | +            | +          |
| HSPA9B      | +          | +          | +          | +            | +          |
| TCERG1      | +          | +          | +          | +            | +          |
| RNU3IP2     | +          | +          | +          | +            | +          |
| SFRS7       | +          | +          | +          | +            | +          |
| MSH6        | +          | +          | +          | +            | +          |
| CENPF       | +          | +          | +          | +            | +          |
| MXI1        | +          | +          | +          | +            | +          |
| AMD1        | +          | +          | +          | +            | +          |
| ELK1        | +          | +          | +          | +            | +          |
| ILF3        | +          | +          | +          | +            | +          |
| TFDP1       | +          | +          | +          | +            | +          |
| n.a.        | +          | +          | +          | +            | +          |
| TOP2A       | +          | +          | +          | +            | +          |
| EIF5A       | +          | +          | +          | +            | +          |
| n.a.        | +          | +          | +          | +            | +          |
| n.a.        | +          | +          | +          | +            | +          |
| ATIC        | +          | +          | +          | +            | +          |
| ATIC        | +          | +          | +          | +            | +          |
| PEX5        | +          | +          | +          | +            | +          |
| TAF4B       | +          | +          | +          | +            | +          |
| HDGF        | +          | +          | +          | +            | +          |
| HDGF        | +          | +          | +          | +            | +          |
| ILF2        | +          | +          | +          | +            | +          |
| CCNA2       | +          | +          | +          | +            | +          |
| MDH2        | +          | +          | +          | +            | +          |
| PEG10       | -          | +          | +          | +            | +          |
| PPRC1       | +          | +          | +          | +            | +          |
| SSRP1       | +          | +          | +          | +            | +          |
| PTK9        | -          | -          | -          | -            | -          |

| HGNC Symbol | signEx_4Tc | signEx_3Tc | signEx_2Tc | signEx_1 5Tc | signEx_1Tc |
|-------------|------------|------------|------------|--------------|------------|
| ACSL1       | +          | +          | +          | +            | +          |
| PFKM        | +          | +          | +          | +            | +          |
| HNRPDL      | +          | +          | +          | +            | +          |
| RPIA        | +          | +          | +          | +            | +          |
| SLC16A1     | -          | -          | -          | +            | -          |
| KCNJ6       | +          | +          | +          | +            | +          |
| SFRS2       | +          | +          | +          | +            | +          |
| PRKCI       | +          | +          | +          | +            | +          |
| POLR2H      | +          | +          | +          | +            | +          |
| ABCE1       | +          | +          | +          | +            | +          |
| MELK        | +          | +          | +          | +            | +          |
| DDX21       | +          | +          | +          | +            | +          |
| SSSCA1      | +          | +          | +          | +            | +          |
| n.a.        | +          | +          | +          | +            | +          |
| HSPCA       | +          | +          | +          | +            | +          |
| DEAF1       | +          | +          | +          | +            | +          |
| n.a.        | +          | +          | +          | +            | +          |
| EIF1AX      | +          | +          | +          | +            | +          |
| n.a.        | +          | +          | +          | +            | +          |
| n.a.        | +          | +          | +          | +            | +          |
| SF3A3       | +          | +          | +          | +            | +          |
| n.a.        | -          | -          | -          | +            | +          |
| AK2         | +          | +          | +          | +            | +          |
| PLAUR       | +          | +          | +          | +            | +          |
| SCARB1      | +          | +          | +          | +            | +          |
| MCM2        | +          | +          | +          | +            | +          |
| EXOSC7      | +          | +          | +          | +            | +          |
| KHSRP       | +          | +          | +          | +            | +          |
| NUDC        | +          | +          | +          | +            | +          |
| CGRRF1      | +          | +          | +          | +            | +          |
| APEX1       | +          | +          | +          | +            | +          |
| GARS        | +          | +          | +          | +            | +          |
| EIF3S9      | +          | +          | +          | +            | +          |
| IMPDH1      | +          | +          | +          | +            | +          |
| VEGF        | -          | +          | -          | -            | -          |
| TFDP2       | +          | +          | +          | +            | +          |
| PRDX1       | +          | +          | +          | +            | +          |
| SCO2        | +          | +          | +          | +            | +          |
| TUBG1       | +          | +          | +          | +            | +          |
| MYCN        | +          | +          | +          | +            | +          |
| ABL2        | -          | -          | -          | +            | +          |
| SLC20A1     | +          | +          | +          | +            | +          |
| CDKN2B      | -          | -          | -          | +            | +          |
| n.a.        | +          | +          | +          | +            | +          |
| FANCG       | +          | +          | +          | +            | +          |
| PMPCA       | +          | +          | +          | +            | +          |
| PSMC3       | +          | +          | +          | +            | +          |
| MCM7        | +          | +          | +          | +            | +          |
| ABCA3       | +          | +          | +          | +            | +          |
| EIF4EBP1    | +          | +          | +          | +            | +          |
| TNFRSF4     | -          | -          | +          | +            | +          |
| SRP72       | +          | +          | +          | +            | +          |
| ALG3        | +          | +          | +          | +            | +          |
| CKS1B       | +          | +          | +          | +            | +          |
| NSEP1       | +          | +          | +          | +            | +          |
| FARSLA      | +          | +          | +          | +            | +          |
| PRIM1       | +          | +          | +          | +            | +          |

| HGNC Symbol | signEx_4Tc | signEx_3Tc | signEx_2Tc | signEx_1 5Tc | signEx_1Tc |
|-------------|------------|------------|------------|--------------|------------|
| TBL3        | +          | +          | +          | +            | +          |
| JUND        | +          | +          | +          | +            | +          |
| PTBP1       | +          | +          | +          | +            | +          |
| MRE11A      | +          | +          | +          | +            | +          |
| HSPA5       | +          | +          | +          | +            | +          |
| OAT         | +          | +          | +          | +            | +          |
| TFRC        | +          | +          | +          | +            | +          |
| SHMT1       | +          | +          | +          | +            | +          |
| CLNS1A      | +          | +          | +          | +            | +          |
| SEMA3C      | -          | -          | -          | -            | -          |
| MCAM        | +          | +          | +          | +            | +          |
| MAPKAPK5    | +          | +          | +          | +            | +          |
| SIP1        | +          | +          | +          | +            | +          |
| NF2         | +          | +          | +          | +            | +          |
| SLC1A5      | +          | +          | +          | +            | +          |
| PSMA2       | +          | +          | +          | +            | +          |
| RAD51C      | +          | +          | +          | +            | +          |
| CTSC        | +          | +          | +          | +            | +          |
| HSPA8       | +          | +          | +          | +            | +          |
| n.a.        | +          | +          | +          | +            | +          |
| IGFBP2      | +          | +          | +          | +            | +          |
| DARS        | +          | +          | +          | +            | +          |
| UCHL3       | +          | +          | +          | +            | +          |
| GTF3A       | +          | +          | +          | +            | +          |
| RPL5        | +          | +          | +          | +            | +          |
| AMD1        | +          | +          | +          | +            | +          |
| HSPA1A      | -          | +          | +          | +            | +          |
| SYNGR3      | +          | +          | +          | +            | +          |
| NINJ1       | -          | -          | -          | +            | +          |
| SNRPA1      | +          | +          | +          | +            | +          |
| TAF9        | +          | +          | +          | +            | +          |
| SYNCRIP     | +          | +          | +          | +            | +          |
| n.a.        | +          | +          | +          | +            | +          |
| ITGB3BP     | +          | +          | +          | +            | +          |
| PTPRF       | +          | +          | +          | +            | +          |
| CHEK1       | +          | +          | +          | +            | +          |
| TCEB1       | +          | +          | +          | +            | +          |
| n.a.        | +          | +          | +          | +            | +          |
| VBP1        | +          | +          | +          | +            | +          |
| BUB1B       | +          | +          | +          | +            | +          |
| RACGAP1     | +          | +          | +          | +            | +          |
| AK3         | +          | +          | +          | +            | +          |
| HNRPF       | +          | +          | +          | +            | +          |
| PDAP1       | +          | +          | +          | +            | +          |
| SELE        | +          | +          | +          | +            | +          |
| n.a.        | +          | +          | +          | +            | +          |
| RCN1        | -          | -          | -          | -            | -          |
| GLDC        | +          | +          | +          | +            | +          |
| PMS1        | +          | -          | +          | +            | +          |
| PFKP        | +          | +          | +          | +            | +          |
| PDCD2       | +          | +          | +          | +            | +          |
| MGST2       | +          | +          | +          | +            | +          |
| NDUFB7      | +          | +          | +          | +            | +          |
| G22P1       | +          | +          | +          | +            | +          |
| n.a.        | +          | +          | +          | +            | +          |
| PBEF1       | -          | +          | -          | +            | +          |
| TBL2        | +          | +          | +          | +            | +          |



| HGNC Symbol | signEx_4Tc | signEx_3Tc | signEx_2Tc | signEx_1 5Tc | signEx_1Tc |
|-------------|------------|------------|------------|--------------|------------|
| GCN5L2      | +          | +          | +          | +            | +          |
| CDK2AP1     | +          | +          | +          | +            | +          |
| NOL1        | +          | +          | +          | +            | +          |
| SLC29A1     | +          | +          | +          | +            | +          |
| BNIP1       | +          | +          | +          | +            | +          |
| DBN1        | +          | +          | +          | +            | +          |
| EIF4G1      | +          | +          | +          | +            | +          |
| B4GALT2     | +          | +          | +          | +            | +          |
| TMEM5       | +          | +          | +          | +            | +          |
| FVT1        | -          | -          | -          | -            | -          |
| ETF1        | +          | +          | +          | +            | +          |
| ATF4        | +          | +          | +          | +            | +          |
| ILF3        | +          | +          | +          | +            | +          |
| RAMP1       | +          | +          | +          | +            | +          |
| n.a.        | +          | +          | +          | +            | +          |
| ADCY3       | +          | +          | +          | +            | +          |
| AFG3L2      | +          | +          | +          | +            | +          |
| PRPS1       | +          | +          | +          | +            | +          |
| OPRS1       | -          | +          | +          | +            | +          |
| TOMM70A     | +          | +          | +          | +            | +          |
| APRT        | +          | +          | +          | +            | +          |
| FGFR4       | -          | -          | -          | +            | +          |
| DEFA6       | +          | -          | -          | +            | +          |
| ZNF9        | +          | +          | +          | +            | +          |
| RAC3        | -          | -          | -          | -            | -          |
| WNT10B      | +          | -          | +          | +            | -          |
| NFRKB       | +          | +          | +          | +            | +          |
| CDK5R2      | -          | -          | -          | -            | -          |
| CYCS        | -          | -          | +          | +            | -          |
| YES1        | +          | +          | +          | +            | +          |
| DLEU1       | +          | +          | +          | +            | +          |
| BNIP3       | +          | +          | +          | +            | +          |
| RAD23A      | +          | +          | +          | +            | +          |
|             | -          | -          | -          | -            | -          |
| UBE2G2      | +          | +          | +          | +            | +          |
| KCNQ3       | -          | -          | -          | -            | -          |
| MTA1        | +          | +          | +          | +            | +          |
| LIG3        | +          | +          | +          | +            | +          |
| ITGA2B      | +          | -          | +          | +            | +          |
| TOMM34      | +          | +          | +          | +            | -          |
| ITIH4       | +          | +          | +          | +            | +          |
| POLD1       | +          | +          | +          | +            | +          |
| IKBKAP      | +          | +          | +          | +            | +          |
| ASNS        | +          | +          | +          | +            | +          |
| MX1         | -          | -          | -          | -            | -          |
| XRCC5       | +          | +          | +          | +            | +          |
| XPO1        | +          | +          | +          | +            | +          |
| RAD54L      | +          | +          | +          | +            | +          |
| PTHLH       | -          | -          | -          | -            | +          |
| MSH2        | +          | +          | +          | +            | +          |
| CDKL1       | +          | +          | +          | +            | +          |
| ADA         | +          | +          | +          | +            | +          |
| n.a.        | +          | +          | +          | +            | +          |
| TGFB1       | -          | -          | -          | -            | -          |
| NPTX2       | -          | -          | -          | -            | -          |
| BAG1        | +          | +          | +          | +            | +          |
| BAG1        | +          | +          | +          | +            | +          |

| HGNC Symbol | signEx_4Tc | signEx_3Tc | signEx_2Tc | signEx_1 5Tc | signEx_1Tc |
|-------------|------------|------------|------------|--------------|------------|
| SHB         | +          | +          | +          | +            | +          |
| EIF3S10     | +          | +          | +          | +            | +          |
| HTATIP2     | -          | -          | -          | -            | -          |
| CALCA       | +          | +          | +          | +            | +          |
| C6orf108    | +          | +          | +          | +            | +          |
| ACY1        | +          | +          | +          | +            | +          |
| PASK        | -          | +          | -          | +            | +          |
| CEBPZ       | +          | +          | +          | +            | +          |
| RAP1A       | +          | +          | +          | +            | +          |
| NID         | +          | -          | -          | -            | -          |
| IDE         | +          | +          | +          | +            | +          |
| HOXB7       | +          | -          | -          | -            | -          |
| GUCY1B2     | +          | +          | +          | +            | +          |
| SERPINA7    | +          | +          | +          | +            | +          |
| FPRL2       | +          | +          | +          | +            | +          |
| MTRR        | +          | +          | +          | +            | +          |
| THRA        | +          | +          | +          | +            | +          |
| POR         | +          | +          | +          | +            | +          |
| YWHAH       | +          | +          | +          | +            | +          |
| TRIM28      | +          | +          | +          | +            | +          |
| DHX30       | +          | +          | +          | +            | +          |
| CDK8        | +          | +          | +          | +            | +          |
| CCNH        | +          | +          | +          | +            | +          |
| RFK         | +          | +          | +          | +            | +          |
| RABGGTB     | +          | +          | +          | +            | +          |
| PLK4        | +          | +          | +          | +            | +          |
| CYP4B1      | -          | -          | -          | -            | -          |
| TP53BP2     | +          | +          | +          | +            | +          |
| NVL         | +          | +          | +          | +            | +          |
| ARF1        | +          | +          | +          | +            | +          |
| PLK2        | +          | +          | +          | +            | +          |
| GZMA        | -          | +          | -          | +            | -          |
| NOLA2       | +          | +          | +          | +            | +          |
| HMBS        | +          | +          | +          | +            | +          |
| ITIH2       | -          | -          | -          | -            | -          |
| SACS        | +          | +          | +          | +            | +          |
| GABPA       | +          | +          | +          | +            | +          |
| ETS2        | +          | +          | +          | +            | +          |
| IL8RA       | +          | +          | +          | +            | +          |
| API5        | +          | +          | +          | +            | +          |
| n.a.        | +          | +          | +          | +            | +          |
| ICT1        | +          | +          | +          | +            | +          |
| DFFB        | +          | +          | +          | +            | +          |
| USP7        | +          | +          | +          | +            | +          |
| PAP         | +          | +          | +          | +            | +          |
| BSG         | +          | +          | +          | +            | +          |
| YIF1        | +          | +          | +          | +            | +          |
| POLE        | +          | +          | +          | +            | +          |
|             | -          | -          | +          | +            | -          |

| HGNC Symbol | signEx_0 5Tc | signEx_0Tc |
|-------------|--------------|------------|
| MYC         | +            | +          |
| CACNA1G     | +            | +          |
| NME1        | +            | +          |
| ADCY2       | -            | +          |
| C4orf9      | +            | +          |
| FKBP5       | +            | +          |
| CRKL        | +            | +          |
| RFC5        | +            | +          |
| PPP2CA      | +            | +          |
| TIMM8A      | +            | +          |
| n.a.        | +            | +          |
| MAD2L1      | +            | +          |
| MRPL12      | +            | +          |
| NME1        | +            | +          |
| METTL1      | +            | +          |
| SLC7A5      | +            | +          |
| SRM         | +            | +          |
| IL1B        | +            | +          |
| PAICS       | +            | +          |
| TOMM40      | +            | +          |
| PYCR1       | +            | +          |
| UMPK        | +            | +          |
| LRP8        | +            | +          |
| DUSP14      | +            | +          |
| METAP1      | +            | +          |
| ABCE1       | +            | +          |
| PA2G4       | +            | +          |
| BOP1        | +            | +          |
| RANBP1      | +            | +          |
| CTPS        | +            | +          |
| TRAP1       | +            | +          |
| HSPD1       | +            | +          |
| PFAS        | +            | +          |
| TEAD4       | +            | +          |
| MIF         | +            | +          |
| VAR2        | +            | +          |
| CENTG1      | +            | +          |
| DSCR2       | +            | +          |
| JAG2        | +            | +          |
| PRKAR1B     | +            | +          |
| n.a.        | +            | +          |
| MATK        | +            | +          |
| IARS        | +            | +          |
| GAL         | +            | +          |
| MCAM        | +            | +          |
| CAD         | +            | +          |
| FH          | +            | +          |
| SRPK1       | +            | +          |
| NEFH        | +            | +          |
| NP          | +            | +          |
| AHCY        | +            | +          |
| POLD2       | +            | +          |
| C1QBP       | +            | +          |
| CAMKK2      | +            | +          |
| n.a.        | +            | +          |
| BYSL        | +            | +          |
| NUP155      | +            | +          |

| HGNC Symbol | signEx_0 5Tc | signEx_0Tc |
|-------------|--------------|------------|
| IFRD2       | +            | +          |
| MRPL3       | +            | +          |
| HSPE1       | +            | +          |
| HSPE1       | +            | +          |
| n.a.        | +            | +          |
| EBNA1BP2    | +            | +          |
| TNFRSF8     | +            | +          |
| PRDX4       | +            | +          |
| CSE1L       | +            | +          |
| RPP40       | +            | +          |
| n.a.        | +            | +          |
| HRMT1L2     | +            | +          |
| n.a.        | +            | +          |
| n.a.        | +            | +          |
| MADH4       | +            | +          |
| IL9         | +            | +          |
| PDCD11      | +            | +          |
| HK2         | +            | +          |
| PWP2H       | +            | +          |
| n.a.        | +            | +          |
| NOLC1       | +            | +          |
| NOLC1       | +            | +          |
| CCT2        | +            | +          |
| DTYMK       | +            | +          |
| HNRPAB      | +            | +          |
| FASN        | +            | +          |
| FASN        | +            | +          |
| NMB         | +            | +          |
| CHC1        | +            | +          |
|             | +            | +          |
| KIAA0179    | +            | +          |
| NTHL1       | +            | +          |
| UNG         | +            | +          |
| KIAA0020    | +            | +          |
| n.a.        | +            | +          |
| n.a.        | +            | +          |
| POLE2       | +            | +          |
| MTHFD1      | +            | +          |
| NOL5A       | +            | +          |
| PRPS2       | +            | +          |
| RUVBL2      | +            | +          |
| GPI         | +            | +          |
| n.a.        | +            | +          |
| NPM3        | +            | +          |
| n.a.        | +            | +          |
| CDC20       | +            | +          |
| n.a.        | +            | +          |
| PRKDC       | +            | +          |
| CKS2        | +            | +          |
| CSE1L       | +            | +          |
| EEF1E1      | +            | +          |
| HRMT1L2     | +            | +          |
| n.a.        | +            | +          |
| TST         | +            | +          |
| DKC1        | +            | +          |
| RAN         | +            | +          |
| PDGFRA      | +            | +          |

| <b>HGNC Symbol</b> | <b>signEx_0 5Tc</b> | <b>signEx_0Tc</b> |
|--------------------|---------------------|-------------------|
| CDK4               | +                   | +                 |
| ALDH1B1            | +                   | +                 |
| SORD               | +                   | +                 |
| BDH                | +                   | +                 |
| GMPS               | +                   | +                 |
| GPR30              | +                   | +                 |
| PHB                | +                   | +                 |
| STRA13             | +                   | +                 |
| XPOT               | +                   | +                 |
| SMN1               | +                   | +                 |
| CHC1               | +                   | +                 |
| PLK1               | +                   | +                 |
| n.a.               | +                   | +                 |
| AK2                | +                   | +                 |
| n.a.               | +                   | +                 |
| MGST1              | +                   | +                 |
| CSDA               | +                   | +                 |
| n.a.               | +                   | +                 |
| ATP1B3             | +                   | +                 |
| BCS1L              | +                   | +                 |
| UNG                | +                   | +                 |
| PBP                | +                   | +                 |
| CDC6               | +                   | +                 |
| CDC7               | +                   | +                 |
| MTAP               | +                   | +                 |
| ADSL               | +                   | +                 |
| CDKN3              | +                   | +                 |
| VRK1               | +                   | +                 |
| WFDC2              | +                   | +                 |
| GSPT1              | +                   | +                 |
| SLC39A14           | +                   | +                 |
| n.a.               | +                   | +                 |
| RLN2               | +                   | +                 |
| BAG2               | +                   | +                 |
| HSD17B8            | +                   | +                 |
| UCHL3              | +                   | +                 |
| NME2               | +                   | +                 |
| MRPS12             | +                   | +                 |
| PCNA               | +                   | +                 |
| DPH2L2             | +                   | +                 |
| CCNB1              | +                   | +                 |
| MC1R               | +                   | +                 |
| SOD1               | +                   | +                 |
| ATP5G3             | +                   | +                 |
| CCT3               | +                   | +                 |
| RFC4               | +                   | +                 |
| CDC25A             | +                   | +                 |
| FRDA               | +                   | +                 |
| SNRPD1             | +                   | +                 |
| CHAF1A             | +                   | +                 |
| PRDX2              | +                   | +                 |
| BUB1               | +                   | +                 |
| CDC2               | +                   | +                 |
| POLR1C             | +                   | +                 |
| SLC19A1            | +                   | +                 |
| TOMM20             | +                   | +                 |
| MMP3               | +                   | +                 |

| HGNC Symbol | signEx_0 5Tc | signEx_0Tc |
|-------------|--------------|------------|
| UBE2C       | +            | +          |
| PTPN2       | +            | +          |
| RUVBL1      | +            | +          |
| TYMS        | +            | +          |
| DDX10       | +            | +          |
| TUFM        | +            | +          |
| AURKB       | +            | +          |
| RRS1        | +            | +          |
| GEMIN4      | +            | +          |
| PTMA        | +            | +          |
| CYP51A1     | +            | +          |
| ARHGEF5     | +            | +          |
| KIAA0690    | +            | +          |
| VDAC1       | +            | +          |
| DDX1        | +            | +          |
| SCAMP1      | +            | +          |
| DDX18       | +            | +          |
| PES1        | +            | +          |
| RANGAP1     | +            | +          |
| APEX1       | +            | +          |
| MYBL2       | +            | +          |
| USP10       | +            | +          |
| n.a.        | +            | +          |
| RPA3        | +            | +          |
| CXCL12      | +            | +          |
| n.a.        | +            | +          |
| MCM3        | +            | +          |
| GMNN        | +            | +          |
| HSPA9B      | +            | +          |
| TCERG1      | +            | +          |
| RNU3IP2     | +            | +          |
| SFRS7       | +            | +          |
| MSH6        | +            | +          |
| CENPF       | +            | +          |
| MXI1        | +            | +          |
| AMD1        | +            | +          |
| ELK1        | +            | +          |
| ILF3        | +            | +          |
| TFDP1       | +            | +          |
| n.a.        | +            | +          |
| TOP2A       | +            | +          |
| EIF5A       | +            | +          |
| n.a.        | +            | +          |
| n.a.        | +            | +          |
| ATIC        | +            | +          |
| ATIC        | +            | +          |
| PEX5        | +            | +          |
| TAF4B       | +            | +          |
| HDGF        | +            | +          |
| HDGF        | +            | +          |
| ILF2        | +            | +          |
| CCNA2       | +            | +          |
| MDH2        | +            | +          |
| PEG10       | +            | +          |
| PPRC1       | +            | +          |
| SSRP1       | +            | +          |
| PTK9        | +            | +          |

| HGNC Symbol | signEx_0 5Tc | signEx_0Tc |
|-------------|--------------|------------|
| ACSL1       | +            | +          |
| PFKM        | +            | +          |
| HNRPD       | +            | +          |
| RPIA        | +            | +          |
| SLC16A1     | +            | +          |
| KCNJ6       | +            | +          |
| SFRS2       | +            | +          |
| PRKCI       | +            | +          |
| POLR2H      | +            | +          |
| ABCE1       | +            | +          |
| MELK        | +            | +          |
| DDX21       | +            | +          |
| SSSCA1      | +            | +          |
| n.a.        | +            | +          |
| HSPCA       | +            | +          |
| DEAF1       | +            | +          |
| n.a.        | +            | +          |
| EIF1AX      | +            | +          |
| n.a.        | +            | +          |
| n.a.        | +            | +          |
| SF3A3       | +            | +          |
| n.a.        | +            | +          |
| AK2         | +            | +          |
| PLAUR       | +            | +          |
| SCARB1      | +            | +          |
| MCM2        | +            | +          |
| EXOSC7      | +            | +          |
| KHSRP       | +            | +          |
| NUDC        | +            | +          |
| CGRRF1      | +            | +          |
| APEX1       | +            | +          |
| GARS        | +            | +          |
| EIF3S9      | +            | +          |
| IMPDH1      | +            | +          |
| VEGF        | -            | +          |
| TFDP2       | +            | +          |
| PRDX1       | +            | +          |
| SCO2        | +            | +          |
| TUBG1       | +            | +          |
| MYCN        | +            | +          |
| ABL2        | +            | +          |
| SLC20A1     | +            | +          |
| CDKN2B      | +            | +          |
| n.a.        | +            | +          |
| FANCG       | +            | +          |
| PMPCA       | +            | +          |
| PSMC3       | +            | +          |
| MCM7        | +            | +          |
| ABCA3       | +            | +          |
| EIF4EBP1    | +            | +          |
| TNFRSF4     | +            | +          |
| SRP72       | +            | +          |
| ALG3        | +            | +          |
| CKS1B       | +            | +          |
| NSEP1       | +            | +          |
| FARSLA      | +            | +          |
| PRIM1       | +            | +          |

| HGNC Symbol | signEx_0 5Tc | signEx_0Tc |
|-------------|--------------|------------|
| TBL3        | +            | +          |
| JUND        | +            | +          |
| PTBP1       | +            | +          |
| MRE11A      | +            | +          |
| HSPA5       | +            | +          |
| OAT         | +            | +          |
| TFRC        | +            | +          |
| SHMT1       | +            | +          |
| CLNS1A      | +            | +          |
| SEMA3C      | +            | +          |
| MCAM        | +            | +          |
| MAPKAPK5    | +            | +          |
| SIP1        | +            | +          |
| NF2         | +            | +          |
| SLC1A5      | +            | +          |
| PSMA2       | +            | +          |
| RAD51C      | +            | +          |
| CTSC        | +            | +          |
| HSPA8       | +            | +          |
| n.a.        | +            | +          |
| IGFBP2      | +            | +          |
| DARS        | +            | +          |
| UCHL3       | +            | +          |
| GTF3A       | +            | +          |
| RPL5        | +            | +          |
| AMD1        | +            | +          |
| HSPA1A      | +            | +          |
| SYNGR3      | +            | +          |
| NINJ1       | +            | +          |
| SNRPA1      | +            | +          |
| TAF9        | +            | +          |
| SYNCRIP     | +            | +          |
| n.a.        | +            | +          |
| ITGB3BP     | +            | +          |
| PTPRF       | +            | +          |
| CHEK1       | +            | +          |
| TCEB1       | +            | +          |
| n.a.        | +            | +          |
| VBP1        | +            | +          |
| BUB1B       | +            | +          |
| RACGAP1     | +            | +          |
| AK3         | +            | +          |
| HNRPF       | +            | +          |
| PDAP1       | +            | +          |
| SELE        | +            | +          |
| n.a.        | +            | +          |
| RCN1        | +            | +          |
| GLDC        | +            | +          |
| PMS1        | +            | +          |
| PFKP        | +            | +          |
| PDCD2       | +            | +          |
| MGST2       | +            | +          |
| NDUFB7      | +            | +          |
| G22P1       | +            | +          |
| n.a.        | +            | +          |
| PBEF1       | +            | +          |
| TBL2        | +            | +          |



| HGNC Symbol | signEx_0 5Tc | signEx_0Tc |
|-------------|--------------|------------|
| GCN5L2      | +            | +          |
| CDK2AP1     | +            | +          |
| NOL1        | +            | +          |
| SLC29A1     | +            | +          |
| BNIP1       | +            | +          |
| DBN1        | +            | +          |
| EIF4G1      | +            | +          |
| B4GALT2     | +            | +          |
| TMEM5       | +            | +          |
| FVT1        | +            | +          |
| ETF1        | +            | +          |
| ATF4        | +            | +          |
| ILF3        | +            | +          |
| RAMP1       | +            | +          |
| n.a.        | +            | +          |
| ADCY3       | +            | +          |
| AFG3L2      | +            | +          |
| PRPS1       | +            | +          |
| OPRS1       | +            | +          |
| TOMM70A     | +            | +          |
| APRT        | +            | +          |
| FGFR4       | +            | +          |
| DEFA6       | +            | +          |
| ZNF9        | +            | +          |
| RAC3        | +            | +          |
| WNT10B      | +            | +          |
| NFRKB       | +            | +          |
| CDK5R2      | +            | +          |
| CYCS        | +            | +          |
| YES1        | +            | +          |
| DLEU1       | +            | +          |
| BNIP3       | +            | +          |
| RAD23A      | +            | +          |
|             | +            | +          |
| UBE2G2      | +            | +          |
| KCNQ3       | -            | +          |
| MTA1        | +            | +          |
| LIG3        | +            | +          |
| ITGA2B      | +            | +          |
| TOMM34      | +            | +          |
| ITIH4       | +            | +          |
| POLD1       | +            | +          |
| IKBKAP      | +            | +          |
| ASNS        | +            | +          |
| MX1         | -            | +          |
| XRCC5       | +            | +          |
| XPO1        | +            | +          |
| RAD54L      | +            | +          |
| PTHLH       | -            | +          |
| MSH2        | +            | +          |
| CDKL1       | +            | +          |
| ADA         | +            | +          |
| n.a.        | +            | +          |
| TGFB1       | -            | +          |
| NPTX2       | -            | +          |
| BAG1        | +            | +          |
| BAG1        | +            | +          |

| HGNC Symbol | signEx_0 5Tc | signEx_0Tc |
|-------------|--------------|------------|
| SHB         | +            | +          |
| EIF3S10     | +            | +          |
| HTATIP2     | -            | +          |
| CALCA       | +            | +          |
| C6orf108    | +            | +          |
| ACY1        | +            | +          |
| PASK        | +            | +          |
| CEBPZ       | +            | +          |
| RAP1A       | +            | +          |
| NID         | -            | +          |
| IDE         | +            | +          |
| HOXB7       | -            | +          |
| GUCY1B2     | +            | +          |
| SERPINA7    | +            | +          |
| FPRL2       | +            | +          |
| MTRR        | +            | +          |
| THRA        | +            | +          |
| POR         | +            | +          |
| YWHAH       | +            | +          |
| TRIM28      | +            | +          |
| DHX30       | +            | +          |
| CDK8        | +            | +          |
| CCNH        | +            | +          |
| RFK         | +            | +          |
| RABGGTB     | +            | +          |
| PLK4        | +            | +          |
| CYP4B1      | -            | +          |
| TP53BP2     | +            | +          |
| NVL         | +            | +          |
| ARF1        | +            | +          |
| PLK2        | +            | +          |
| GZMA        | -            | +          |
| NOLA2       | +            | +          |
| HMBS        | +            | +          |
| ITIH2       | -            | +          |
| SACS        | +            | +          |
| GABPA       | +            | +          |
| ETS2        | +            | +          |
| IL8RA       | +            | +          |
| API5        | +            | +          |
| n.a.        | +            | +          |
| ICT1        | +            | +          |
| DFFB        | +            | +          |
| USP7        | +            | +          |
| PAP         | +            | +          |
| BSG         | +            | +          |
| YIF1        | +            | +          |
| POLE        | +            | +          |
|             | +            | +          |
